# Supplementary material for: Deep-sea water displacement from a turbidity current induced by the Super Typhoon Hagibis
Source: PeerJ. 2020 Dec 9;8:e10429. doi: 10.7717/peerj.10429 (PMC7733332; doi:10.7717/peerj.10429)
Supplement: Supplemental Information 2 [file peerj-08-10429-s002.xlsx]

## Sheet: Sheet1
SalCTD	TempCTD	DepthMeter	Time	TempE	SalE	Turb	Press
20.736	24.8789	0	0.5625	2.784	34.5	7.67	14.0467
30.691	25.1956	0.9144	0.562512	2.785	34.499	7.97	14.0481
32.566	25.2056	1.8288	0.562523	2.785	34.499	7.19	14.0495
33.248	25.1956	2.7432	0.562535	2.785	34.499	8.38	14.0502
33.453	25.2039	3.6576	0.562546	2.786	34.499	8.13	14.051
33.503	25.2056	4.572	0.562558	2.785	34.499	7.66	14.0502
33.524	25.2056	5.4864	0.562569	2.785	34.499	7.19	14.0517
33.531	25.2056	6.4008	0.562581	2.785	34.5	8.36	14.0517
33.537	25.2056	7.3152	0.562593	2.784	34.499	8.24	14.0517
33.542	25.2061	8.2296	0.562604	2.784	34.499	7.78	14.0524
33.543	25.215	9.144	0.583333	2.796	34.492	5.72	14.0488
33.545	25.2117	10.0584	0.583345	2.796	34.492	5.34	14.0502
33.546	25.2106	10.9728	0.583356	2.796	34.492	5.59	14.0517
33.55	25.2078	11.8872	0.583368	2.796	34.492	5.27	14.0517
33.554	25.225	12.8016	0.58338	2.796	34.492	4.67	14.0531
33.554	25.215	13.716	0.583391	2.796	34.492	6.56	14.0531
33.558	25.215	14.6304	0.583403	2.797	34.492	5.48	14.0524
33.563	25.2189	15.5448	0.583414	2.797	34.491	5.28	14.0531
33.564	25.215	16.4592	0.583426	2.797	34.492	5.16	14.0538
33.565	25.2244	17.3736	0.583437	2.797	34.492	5.62	14.0538
33.568	25.225	18.288	0.604167	2.802	34.491	3.74	14.051
33.568	25.225	19.2024	0.604178	2.802	34.49	4.39	14.0531
33.57	25.225	20.1168	0.60419	2.802	34.49	4.28	14.0531
33.579	25.225	21.0312	0.604201	2.802	34.491	3.91	14.0545
33.585	25.225	21.9456	0.604213	2.802	34.491	3.81	14.0545
33.587	25.225	22.86	0.604225	2.802	34.49	3.81	14.0545
33.587	25.2311	23.7744	0.604236	2.802	34.491	5.16	14.0545
33.591	25.225	24.6888	0.604248	2.802	34.49	4.2	14.0552
33.603	25.245	25.6032	0.604259	2.802	34.491	4.44	14.0545
33.611	25.255	26.5176	0.604271	2.802	34.491	5.3	14.0552
33.61	25.25	27.432	0.625	2.807	34.489	3.65	14.0538
33.613	25.255	28.3464	0.625012	2.807	34.488	3.98	14.0552
33.621	25.255	29.2608	0.625023	2.807	34.489	4.65	14.0566
33.638	25.2744	30.1752	0.625035	2.807	34.489	3.91	14.0566
33.664	25.2944	31.0896	0.625046	2.807	34.489	3.63	14.0566
33.681	25.3244	32.004	0.625058	2.807	34.49	3.84	14.0566
33.695	25.3161	32.9184	0.625069	2.807	34.489	4.2	14.0573
33.716	25.3533	33.8328	0.625081	2.807	34.49	4.07	14.0566
33.739	25.3639	34.7472	0.625093	2.807	34.49	3.79	14.0573
33.753	25.3639	35.6616	0.625104	2.807	34.489	5.12	14.0573
33.752	25.3639	36.576	0.645833	2.811	34.488	3.85	14.0531
33.76	25.3639	37.4904	0.645845	2.811	34.488	4.11	14.0552
33.78	25.3322	38.4048	0.645856	2.811	34.487	3.62	14.0559
33.804	25.2606	39.3192	0.645868	2.811	34.488	3.24	14.0559
33.818	25.215	40.2336	0.64588	2.811	34.488	4.61	14.0566
33.828	25.1767	41.148	0.645891	2.811	34.488	3.34	14.0559
33.878	24.6478	42.0624	0.645903	2.811	34.487	3.36	14.0566
33.937	24.5111	42.9768	0.645914	2.811	34.488	4.73	14.0566
33.976	24.3422	43.8912	0.645926	2.811	34.488	3.9	14.0566
34.015	24.0256	44.8056	0.645937	2.811	34.488	3.9	14.0566
34.035	23.9156	45.72	0.666667	2.81	34.487	4.16	14.0552
34.042	23.7667	46.6344	0.666678	2.81	34.487	3.46	14.0573
34.07	23.38	47.5488	0.66669	2.81	34.487	3.23	14.0581
34.108	23.1878	48.4632	0.666701	2.81	34.487	3.49	14.0588
34.127	23.1367	49.3776	0.666713	2.81	34.487	3.98	14.0588
34.136	23.1172	50.292	0.666725	2.81	34.487	4.97	14.0588
34.138	23.1072	51.2064	0.666736	2.81	34.486	3.45	14.0595
34.14	23.1072	52.1208	0.666748	2.81	34.487	3.82	14.0588
34.143	23.0794	53.0352	0.666759	2.81	34.487	3.95	14.0595
34.145	23.0189	53.9496	0.666771	2.81	34.487	4.84	14.0588
34.154	22.7839	54.864	0.6875	2.828	34.486	2.72	14.0559
34.171	22.5794	55.7784	0.687512	2.828	34.485	2.62	14.0581
34.191	22.2167	56.6928	0.687523	2.828	34.485	3.18	14.0581
34.223	21.8606	57.6072	0.687535	2.828	34.485	2.3	14.0581
34.249	21.7283	58.5216	0.687546	2.828	34.485	2.35	14.0588
34.265	21.6644	59.436	0.687558	2.828	34.485	2.38	14.0588
34.295	21.3261	60.3504	0.687569	2.828	34.485	3.02	14.0588
34.336	20.9994	61.2648	0.687581	2.828	34.484	2.22	14.0588
34.356	20.8233	62.1792	0.687593	2.828	34.485	2.83	14.0595
34.367	20.6033	63.0936	0.687604	2.828	34.485	2.54	14.0588
34.381	20.48	64.008	0.708333	2.859	34.48	1.98	14.0559
34.387	20.4461	64.9224	0.708345	2.86	34.479	2.21	14.0573
34.386	20.355	65.8368	0.708356	2.861	34.479	2.08	14.0581
34.399	20.1011	66.7512	0.708368	2.861	34.479	2.3	14.0595
34.411	20.0467	67.6656	0.70838	2.86	34.481	2.16	14.0595
34.417	19.915	68.58	0.708391	2.86	34.482	2.06	14.0595
34.424	19.8733	69.4944	0.708403	2.861	34.481	2.32	14.0595
34.427	19.7772	70.4088	0.708414	2.86	34.481	2.05	14.0595
34.435	19.6433	71.3232	0.708426	2.86	34.481	2.43	14.0602
34.443	19.6011	72.2376	0.708438	2.86	34.481	1.86	14.0595
34.443	19.5517	73.152	0.729167	2.827	34.483	2.96	14.0566
34.449	19.4111	74.0664	0.729178	2.825	34.484	3.5	14.0581
34.459	19.3111	74.9808	0.72919	2.825	34.484	2.83	14.0588
34.463	19.2222	75.8952	0.729201	2.826	34.484	3.17	14.0588
34.459	19.0639	76.8096	0.729213	2.825	34.483	2.95	14.0595
34.472	18.6717	77.724	0.729225	2.826	34.483	3.43	14.0595
34.493	18.5344	78.6384	0.729236	2.826	34.484	3.74	14.0595
34.503	18.2633	79.5528	0.729248	2.826	34.484	3.08	14.0595
34.511	18.155	80.4672	0.729259	2.826	34.484	3.63	14.0595
34.512	18.0783	81.3816	0.729271	2.826	34.483	3.11	14.0595
34.514	18.0194	82.296	0.75	2.808	34.485	3.07	14.0566
34.517	17.9511	83.2104	0.750012	2.807	34.485	3.49	14.0588
34.52	17.9106	84.1248	0.750023	2.81	34.484	3.18	14.0581
34.519	17.8122	85.0392	0.750035	2.807	34.485	3.14	14.0595
34.517	17.695	85.9536	0.750046	2.808	34.484	3.11	14.0595
34.516	17.5678	86.868	0.750058	2.809	34.484	3.47	14.0602
34.524	17.45	87.7824	0.750069	2.81	34.483	3.27	14.0595
34.521	17.3733	88.6968	0.750081	2.811	34.483	3.33	14.0602
34.523	17.0833	89.6112	0.750093	2.812	34.482	3.45	14.0595
34.531	16.9539	90.5256	0.750104	2.811	34.484	3.21	14.0595
34.535	16.9161	91.44	0.770833	2.778	34.487	4.76	14.0559
34.535	16.8761	92.3544	0.770845	2.778	34.488	4.77	14.0581
34.534	16.7983	93.2688	0.770856	2.778	34.488	4.89	14.0581
34.535	16.72	94.1832	0.770868	2.778	34.488	5.03	14.0581
34.536	16.6444	95.0976	0.77088	2.778	34.488	4.26	14.0588
34.536	16.5767	96.012	0.770891	2.778	34.488	4.22	14.0588
34.535	16.5272	96.9264	0.770903	2.778	34.487	4.55	14.0588
34.534	16.4872	97.8408	0.770914	2.778	34.487	4.51	14.0588
34.533	16.4667	98.7552	0.770926	2.778	34.487	5.06	14.0595
34.532	16.4572	99.6696	0.770938	2.778	34.487	4.26	14.0588
34.534	16.4094	100.584	0.791667	2.772	34.487	5.28	14.0552
34.534	16.375	101.498	0.791678	2.772	34.488	5.62	14.0573
34.536	16.2967	102.413	0.79169	2.772	34.488	5.37	14.0573
34.542	16.2233	103.327	0.791701	2.772	34.488	4.87	14.0573
34.545	16.2083	104.242	0.791713	2.772	34.488	5.18	14.0581
34.547	16.2044	105.156	0.791725	2.772	34.488	5.54	14.0581
34.549	16.195	106.07	0.791736	2.772	34.488	4.73	14.0581
34.551	16.195	106.985	0.791748	2.772	34.488	5.12	14.0573
34.55	16.1989	107.899	0.791759	2.772	34.488	4.77	14.0581
34.546	16.195	108.814	0.791771	2.772	34.488	6.49	14.0581
34.545	16.1939	109.728	0.8125	2.771	34.488	5.12	14.0552
34.544	16.1767	110.642	0.812512	2.77	34.488	5.24	14.0566
34.544	16.1517	111.557	0.812523	2.77	34.489	4.55	14.0573
34.548	16.1206	112.471	0.812535	2.771	34.488	4.09	14.0581
34.549	16.0733	113.386	0.812546	2.771	34.489	4.99	14.0581
34.548	16.0322	114.3	0.812558	2.771	34.488	5.32	14.0581
34.549	16.0111	115.214	0.812569	2.77	34.488	4.95	14.0588
34.549	15.9894	116.129	0.812581	2.77	34.488	4.54	14.0588
34.542	15.9478	117.043	0.812593	2.77	34.488	4.06	14.0588
34.536	15.8072	117.958	0.812604	2.771	34.488	4.32	14.0588
34.538	15.765	118.872	0.833333	2.768	34.487	3.47	14.0517
34.537	15.7367	119.786	0.833345	2.768	34.487	3.66	14.0538
34.533	15.6828	120.701	0.833356	2.768	34.487	4.1	14.0545
34.529	15.5633	121.615	0.833368	2.768	34.487	4.41	14.0545
34.529	15.5233	122.53	0.83338	2.768	34.488	3.63	14.0552
34.529	15.4928	123.444	0.833391	2.768	34.488	4.25	14.0552
34.52	15.4189	124.358	0.833403	2.768	34.488	3.94	14.0552
34.518	15.2861	125.273	0.833414	2.768	34.487	3.91	14.0552
34.523	15.2333	126.187	0.833426	2.768	34.488	3.68	14.0552
34.526	15.2317	127.102	0.833438	2.768	34.488	4.44	14.0552
34.524	15.2094	128.016	0.854167	2.773	34.487	3.23	14.051
34.521	15.1322	128.93	0.854178	2.773	34.486	3.85	14.0538
34.52	15.0828	129.845	0.85419	2.773	34.486	3.26	14.0538
34.521	15.0444	130.759	0.854201	2.773	34.486	4.14	14.0545
34.521	15.0122	131.674	0.854213	2.773	34.486	3.58	14.0545
34.519	14.9978	132.588	0.854225	2.773	34.486	3.52	14.0552
34.516	14.9422	133.502	0.854236	2.773	34.487	3.37	14.0552
34.516	14.8761	134.417	0.854248	2.773	34.487	3.34	14.0552
34.518	14.8578	135.331	0.854259	2.773	34.487	3.28	14.0552
34.519	14.8483	136.246	0.854271	2.773	34.486	3.61	14.0552
34.518	14.8483	137.16	0.875	2.794	34.484	2.37	14.0502
34.518	14.8483	138.074	0.875012	2.794	34.484	2.59	14.0517
34.518	14.8333	138.989	0.875023	2.794	34.484	2.4	14.0524
34.507	14.7933	139.903	0.875035	2.794	34.483	2.37	14.0531
34.501	14.6317	140.818	0.875046	2.794	34.483	2.3	14.0531
34.506	14.605	141.732	0.875058	2.794	34.484	2.54	14.0531
34.507	14.5956	142.646	0.875069	2.794	34.483	3.15	14.0538
34.504	14.5489	143.561	0.875081	2.794	34.484	2.43	14.0531
34.502	14.5022	144.475	0.875093	2.794	34.483	2.28	14.0538
34.503	14.4928	145.39	0.875104	2.794	34.484	2.03	14.0538
34.503	14.4928	146.304	0.895833	2.805	34.482	2.03	14.0488
34.503	14.4922	147.218	0.895845	2.805	34.483	1.83	14.0502
34.498	14.4617	148.133	0.895856	2.805	34.483	1.86	14.051
34.493	14.3939	149.047	0.895868	2.805	34.482	1.82	14.051
34.494	14.3256	149.962	0.89588	2.805	34.482	1.74	14.0517
34.491	14.2594	150.876	0.895891	2.805	34.482	2.05	14.0517
34.49	14.25	151.79	0.895903	2.805	34.482	1.83	14.0517
34.489	14.2311	152.705	0.895914	2.805	34.483	1.79	14.0524
34.485	14.1472	153.619	0.895926	2.805	34.482	2.46	14.0531
34.481	14.0606	154.534	0.895938	2.805	34.482	1.96	14.0517
34.481	14.0206	155.448	0.916667	2.827	34.479	1.54	14.0481
34.483	13.9894	156.362	0.916678	2.828	34.48	1.39	14.0495
34.481	13.9694	157.277	0.91669	2.828	34.472	1.54	14.0495
34.477	13.9472	158.191	0.916701	2.828	34.48	1.74	14.0502
34.478	13.9228	159.106	0.916713	2.828	34.474	1.6	14.051
34.478	13.9228	160.02	0.916725	2.827	34.477	1.57	14.051
34.478	13.855	160.934	0.916736	2.828	34.48	1.35	14.051
34.477	13.7961	161.849	0.916748	2.828	34.48	2	14.051
34.476	13.7544	162.763	0.916759	2.827	34.478	1.61	14.051
34.472	13.7444	163.678	0.916771	2.827	34.48	1.73	14.0517
34.472	13.7072	164.592	0.9375	2.825	34.48	1.66	14.046
34.475	13.6922	165.506	0.937512	2.825	34.48	1.7	14.0481
34.467	13.67	166.421	0.937523	2.824	34.48	1.57	14.0481
34.463	13.5728	167.335	0.937535	2.824	34.48	1.55	14.0495
34.466	13.53	168.25	0.937546	2.824	34.48	1.58	14.0495
34.468	13.53	169.164	0.937558	2.825	34.481	1.39	14.0495
34.467	13.5206	170.078	0.937569	2.825	34.48	1.67	14.0495
34.466	13.5111	170.993	0.937581	2.824	34.48	1.35	14.0495
34.464	13.5111	171.907	0.937593	2.824	34.481	2.03	14.0495
34.461	13.4839	172.822	0.937604	2.824	34.48	1.37	14.0495
34.459	13.4622	173.736	0.958333	2.815	34.48	2.96	14.046
34.456	13.4033	174.65	0.958345	2.815	34.48	1.82	14.0481
34.454	13.3706	175.565	0.958356	2.815	34.48	2.51	14.0481
34.454	13.3144	176.479	0.958368	2.815	34.481	2.09	14.0488
34.457	13.305	177.394	0.95838	2.815	34.48	2.11	14.0488
34.455	13.305	178.308	0.958391	2.815	34.48	3.98	14.0488
34.454	13.305	179.222	0.958403	2.814	34.481	14.3	14.0488
34.452	13.2978	180.137	0.958414	2.815	34.48	1.8	14.0488
34.452	13.2722	181.051	0.958426	2.815	34.48	2.44	14.0488
34.455	13.26	181.966	0.958438	2.815	34.481	2.31	14.0488
34.454	13.2394	182.88	0.979167	2.815	34.479	2.41	14.0445
34.452	13.2306	183.794	0.979178	2.814	34.481	2.48	14.0467
34.451	13.1961	184.709	0.97919	2.814	34.481	2.06	14.0474
34.449	13.165	185.623	0.979201	2.814	34.48	4.41	14.0474
34.45	13.1556	186.538	0.979213	2.815	34.48	2.66	14.0474
34.449	13.1272	187.452	0.979225	2.815	34.48	3.95	14.0481
34.447	13.1178	188.366	0.979236	2.815	34.48	2.96	14.0481
34.445	13.0978	189.281	0.979248	2.815	34.48	4.38	14.0481
34.444	13.0578	190.195	0.979259	2.815	34.48	2.88	14.0474
34.441	13.0083	191.11	0.979271	2.815	34.48	3.28	14.0481
34.439	12.9683	192.024	1	2.793	34.483	3.26	14.0445
34.44	12.9467	192.938	1.00001	2.794	34.482	2.98	14.0467
34.44	12.9344	193.853	1.00002	2.793	34.483	2.85	14.0467
34.441	12.9306	194.767	1.00003	2.793	34.482	2.73	14.0474
34.443	12.9217	195.682	1.00005	2.793	34.483	3.1	14.0474
34.443	12.9028	196.596	1.00006	2.793	34.483	2.62	14.0474
34.437	12.8767	197.51	1.00007	2.793	34.482	3.88	14.0474
34.434	12.8183	198.425	1.00008	2.793	34.483	2.78	14.0481
34.428	12.7511	199.339	1.00009	2.793	34.482	2.88	14.0474
34.427	12.6872	200.254	1.0001	2.793	34.483	3.28	14.0481
34.429	12.6683	201.168	1.02083	2.787	34.484	3.68	14.0452
34.428	12.65	202.082	1.02084	2.787	34.484	3.84	14.0467
34.427	12.6311	202.997	1.02086	2.787	34.484	3.4	14.0474
34.425	12.6311	203.911	1.02087	2.788	34.483	4.32	14.0474
34.423	12.6217	204.826	1.02088	2.788	34.482	3.3	14.0488
34.424	12.6122	205.74	1.02089	2.788	34.481	3.24	14.0488
34.428	12.6028	206.654	1.0209	2.788	34.481	3.93	14.0488
34.428	12.6028	207.569	1.02091	2.787	34.482	3.26	14.0481
34.426	12.5972	208.483	1.02093	2.787	34.482	3.42	14.0488
34.424	12.5933	209.398	1.02094	2.786	34.482	3.79	14.0495
34.418	12.5844	210.312	1.04167	2.706	34.49	39.38	14.0474
34.415	12.4967	211.226	1.04168	2.706	34.49	38.44	14.0481
34.417	12.4717	212.141	1.04169	2.708	34.489	40.57	14.0481
34.415	12.4539	213.055	1.0417	2.708	34.49	39.88	14.0488
34.414	12.4344	213.97	1.04171	2.709	34.488	41.41	14.0495
34.414	12.4156	214.884	1.04172	2.71	34.489	41.81	14.0495
34.411	12.3967	215.798	1.04174	2.71	34.489	42.75	14.0495
34.412	12.3861	216.713	1.04175	2.711	34.489	43.53	14.0495
34.41	12.3683	217.627	1.04176	2.711	34.489	40.9	14.0495
34.409	12.3617	218.542	1.04177	2.711	34.489	42.6	14.0495
34.412	12.3594	219.456	1.0625	2.77	34.485	36.94	14.0481
34.41	12.35	220.37	1.06251	2.769	34.484	35.16	14.0495
34.408	12.3061	221.285	1.06252	2.769	34.484	35.24	14.0488
34.407	12.2656	222.199	1.06253	2.768	34.484	35.16	14.0495
34.397	12.1944	223.114	1.06255	2.769	34.484	35.83	14.0502
34.39	12.0139	224.028	1.06256	2.769	34.484	38.32	14.0502
34.388	11.9467	224.942	1.06257	2.769	34.483	36.57	14.0502
34.383	11.8744	225.857	1.06258	2.769	34.484	37.12	14.051
34.378	11.81	226.771	1.06259	2.769	34.484	34.8	14.051
34.37	11.6878	227.686	1.0626	2.77	34.484	36.21	14.051
34.368	11.5506	228.6	1.08333	2.841	34.479	41.57	14.0467
34.367	11.5333	229.514	1.08334	2.844	34.477	38.56	14.0488
34.364	11.4789	230.429	1.08336	2.853	34.472	38.95	14.0495
34.365	11.43	231.343	1.08337	2.854	34.476	39.65	14.0502
34.361	11.3789	232.258	1.08338	2.847	34.479	40.57	14.0502
34.359	11.2822	233.172	1.08339	2.845	34.477	38.08	14.0502
34.36	11.2606	234.086	1.0834	2.841	34.48	38.33	14.0502
34.359	11.2606	235.001	1.08341	2.844	34.479	36.78	14.0502
34.356	11.245	235.915	1.08343	2.846	34.477	37.2	14.051
34.353	11.2039	236.83	1.08344	2.855	34.471	41.09	14.051
34.354	11.1667	237.744	1.10417	2.838	34.476	33.94	14.0481
34.356	11.1572	238.658	1.10418	2.839	34.475	33.09	14.0502
34.353	11.1572	239.573	1.10419	2.839	34.475	33.03	14.0502
34.35	11.1572	240.487	1.1042	2.839	34.475	33.31	14.051
34.352	11.1572	241.402	1.10421	2.84	34.476	32.7	14.0502
34.354	11.1383	242.316	1.10422	2.841	34.475	31.43	14.051
34.349	11.11	243.23	1.10424	2.841	34.475	33.29	14.0517
34.341	11.0106	244.145	1.10425	2.842	34.474	35.3	14.051
34.336	10.8856	245.059	1.10426	2.842	34.475	31.13	14.0517
34.338	10.8544	245.974	1.10427	2.842	34.475	29.33	14.0517
34.34	10.8367	246.888	1.125	3.045	34.452	73.96	14.0488
34.339	10.8294	247.802	1.12501	3.045	34.452	65.04	14.051
34.339	10.8178	248.717	1.12502	3.045	34.452	71.24	14.0517
34.338	10.8044	249.631	1.12503	3.045	34.452	66.42	14.0517
34.334	10.7356	250.546	1.12505	3.045	34.452	67.63	14.0524
34.333	10.6956	251.46	1.12506	3.045	34.451	70.67	14.0524
34.331	10.6633	252.374	1.12507	3.045	34.451	70.23	14.0531
34.325	10.6133	253.289	1.12508	3.044	34.452	72.62	14.0531
34.322	10.5256	254.203	1.12509	3.044	34.448	67.86	14.0531
34.322	10.5033	255.118	1.1251	3.044	34.451	68.84	14.0531
34.328	10.4878	256.032	1.14583	3.03	34.449	57.93	14.051
34.326	10.4783	256.946	1.14584	3.03	34.451	52.75	14.0531
34.321	10.4311	257.861	1.14586	3.03	34.45	56	14.0531
34.321	10.4217	258.775	1.14587	3.029	34.451	50.68	14.0538
34.322	10.4217	259.69	1.14588	3.029	34.451	58.12	14.0538
34.322	10.3933	260.604	1.14589	3.029	34.452	53.33	14.0538
34.322	10.3683	261.518	1.1459	3.029	34.452	55.26	14.0545
34.318	10.3467	262.433	1.14591	3.029	34.452	56	14.0552
34.315	10.2961	263.347	1.14593	3.03	34.451	63.42	14.0552
34.314	10.2706	264.262	1.14594	3.03	34.45	58.85	14.0552
34.315	10.2239	265.176	1.16667	2.749	34.478	128.66	14.0517
34.318	10.2233	266.09	1.16668	2.749	34.477	140.13	14.0545
34.317	10.2233	267.005	1.16669	2.749	34.477	149.55	14.0545
34.313	10.2139	267.919	1.1667	2.749	34.477	124.06	14.0545
34.312	10.2139	268.834	1.16671	2.749	34.477	137.43	14.0552
34.314	10.2139	269.748	1.16672	2.749	34.477	126.73	14.0559
34.314	10.195	270.662	1.16674	2.749	34.477	125.42	14.0559
34.313	10.1572	271.577	1.16675	2.749	34.477	132.12	14.0559
34.312	10.1383	272.491	1.16676	2.749	34.477	132.52	14.0566
34.31	10.1289	273.406	1.16677	2.749	34.477	137.22	14.0559
34.308	10.11	274.32	1.1875	2.747	34.482	79.6	14.0552
34.305	10.0706	275.234	1.18751	2.748	34.482	82.8	14.0566
34.306	10.0256	276.149	1.18752	2.747	34.483	83.05	14.0573
34.309	10.025	277.063	1.18753	2.747	34.482	77.94	14.0573
34.304	10.0156	277.978	1.18755	2.747	34.482	77.5	14.0573
34.3	9.94111	278.892	1.18756	2.747	34.483	77.31	14.0581
34.3	9.86389	279.806	1.18757	2.747	34.483	78.39	14.0581
34.301	9.85444	280.721	1.18758	2.747	34.482	80.09	14.0581
34.305	9.845	281.635	1.18759	2.747	34.482	78.56	14.0588
34.303	9.845	282.55	1.1876	2.747	34.482	82.7	14.0581
34.3	9.84111	283.464	1.20833	2.748	34.486	36.42	14.0566
34.302	9.83611	284.378	1.20834	2.748	34.486	36.27	14.0581
34.301	9.83556	285.293	1.20836	2.748	34.486	32.49	14.0588
34.3	9.83556	286.207	1.20837	2.748	34.487	33.61	14.0595
34.303	9.83556	287.122	1.20838	2.748	34.482	34.47	14.0595
34.304	9.82889	288.036	1.20839	2.748	34.484	35.33	14.0595
34.304	9.83556	288.95	1.2084	2.747	34.484	36.37	14.0595
34.306	9.82667	289.865	1.20841	2.745	34.486	36.69	14.0595
34.307	9.82611	290.779	1.20843	2.744	34.486	39.04	14.0595
34.307	9.82611	291.694	1.20844	2.743	34.486	35.8	14.0595
34.305	9.82611	292.608	1.22917	2.79	34.485	12.24	14.0545
34.304	9.82611	293.522	1.22918	2.791	34.484	13.37	14.0573
34.3	9.81667	294.437	1.22919	2.792	34.484	11.79	14.0573
34.296	9.80722	295.351	1.2292	2.792	34.483	14.15	14.0581
34.294	9.75667	296.266	1.22921	2.792	34.483	13.15	14.0588
34.294	9.69667	297.18	1.22922	2.791	34.485	11.83	14.0581
34.293	9.64611	298.094	1.22924	2.791	34.485	11.71	14.0588
34.291	9.61056	299.009	1.22925	2.791	34.485	11.93	14.0588
34.289	9.56333	299.923	1.22926	2.79	34.484	11.83	14.0595
34.288	9.465	300.838	1.22927	2.789	34.485	11.38	14.0588
34.287	9.43389	301.752	1.25	2.789	34.484	9.62	14.0566
34.288	9.41889	302.666	1.25001	2.79	34.483	9.58	14.0588
34.282	9.33222	303.581	1.25002	2.789	34.484	9.91	14.0588
34.276	9.22944	304.495	1.25003	2.789	34.484	9.11	14.0602
34.276	9.17389	305.41	1.25005	2.788	34.484	9.38	14.0602
34.276	9.14167	306.324	1.25006	2.787	34.484	9.97	14.0602
34.271	9.09611	307.238	1.25007	2.787	34.485	10.26	14.0602
34.27	9.01167	308.153	1.25008	2.787	34.485	9.24	14.0609
34.271	8.98	309.067	1.25009	2.787	34.485	8.46	14.0602
34.267	8.91944	309.982	1.2501	2.787	34.484	7.92	14.0602
34.266	8.85889	310.896	1.27083	2.751	34.485	15.87	14.0559
34.266	8.83889	311.81	1.27084	2.749	34.486	16.78	14.0573
34.265	8.80333	312.725	1.27086	2.748	34.486	17.42	14.0581
34.267	8.78167	313.639	1.27087	2.748	34.486	21.41	14.0588
34.268	8.76222	314.554	1.27088	2.748	34.486	20.45	14.0588
34.267	8.76222	315.468	1.27089	2.748	34.486	18.42	14.0588
34.267	8.76222	316.382	1.2709	2.748	34.487	14.68	14.0588
34.264	8.73056	317.297	1.27091	2.754	34.484	16.06	14.0588
34.261	8.68944	318.211	1.27093	2.753	34.486	13.68	14.0595
34.263	8.67667	319.126	1.27094	2.757	34.484	13.86	14.0588
34.263	8.66722	320.04	1.29167	2.68	34.493	22.05	14.0559
34.262	8.65778	320.954	1.29168	2.679	34.492	21.78	14.0581
34.264	8.63833	321.869	1.29169	2.679	34.492	24.2	14.0581
34.265	8.61	322.783	1.2917	2.677	34.493	23.69	14.0588
34.26	8.60056	323.698	1.29171	2.677	34.493	24.45	14.0588
34.254	8.52111	324.612	1.29172	2.677	34.493	26.27	14.0595
34.256	8.49556	325.526	1.29174	2.678	34.492	23.31	14.0595
34.26	8.48611	326.441	1.29175	2.678	34.492	23.53	14.0602
34.261	8.47611	327.355	1.29176	2.677	34.493	25.75	14.0595
34.259	8.46111	328.27	1.29177	2.68	34.491	19.83	14.0602
34.257	8.44778	329.184	1.3125	2.724	34.489	8.7	14.0559
34.254	8.41889	330.098	1.31251	2.72	34.492	9.47	14.0581
34.254	8.40944	331.013	1.31252	2.719	34.492	7.97	14.0588
34.254	8.4	331.927	1.31253	2.721	34.491	8.6	14.0588
34.251	8.38056	332.842	1.31255	2.724	34.489	10.03	14.0588
34.25	8.37389	333.756	1.31256	2.724	34.488	13.65	14.0588
34.251	8.38	334.67	1.31257	2.728	34.487	8.05	14.0595
34.253	8.37111	335.585	1.31258	2.726	34.488	9.06	14.0595
34.253	8.36167	336.499	1.31259	2.726	34.488	9.34	14.0602
34.25	8.34278	337.414	1.3126	2.727	34.487	10.26	14.0602
34.249	8.29389	338.328	1.33333	2.77	34.484	7.27	14.0531
34.249	8.25667	339.242	1.33334	2.77	34.483	8.67	14.0559
34.254	8.22778	340.157	1.33336	2.77	34.484	8.57	14.0559
34.256	8.22778	341.071	1.33337	2.77	34.484	9.47	14.0559
34.253	8.20889	341.986	1.33338	2.77	34.484	9.3	14.0566
34.255	8.19944	342.9	1.33339	2.77	34.484	9.31	14.0566
34.254	8.18944	343.814	1.3334	2.771	34.483	8.19	14.0566
34.253	8.16111	344.729	1.33341	2.77	34.484	9.69	14.0573
34.256	8.15556	345.643	1.33343	2.77	34.482	9.49	14.0566
34.257	8.16111	346.558	1.33344	2.77	34.483	9.5	14.0573
34.255	8.15111	347.472	1.35417	2.726	34.489	8.39	14.0538
34.249	8.14167	348.386	1.35418	2.726	34.489	6.74	14.0552
34.248	8.14111	349.301	1.35419	2.726	34.488	9.41	14.0559
34.25	8.13222	350.215	1.3542	2.726	34.488	8.2	14.0559
34.249	8.065	351.13	1.35421	2.726	34.488	7.19	14.0566
34.245	8.02667	352.044	1.35422	2.726	34.489	7.73	14.0559
34.245	7.97556	352.958	1.35424	2.726	34.488	7.25	14.0566
34.249	7.95278	353.873	1.35425	2.726	34.489	6.7	14.0573
34.249	7.92167	354.787	1.35426	2.726	34.488	8.14	14.0573
34.249	7.91167	355.702	1.35427	2.727	34.489	8.42	14.0566
34.247	7.90222	356.616	1.375	2.737	34.491	5.92	14.0517
34.245	7.88333	357.53	1.37501	2.737	34.49	7.91	14.0538
34.246	7.87722	358.445	1.37502	2.737	34.49	5.98	14.0545
34.249	7.88278	359.359	1.37503	2.737	34.491	6.74	14.0545
34.249	7.87333	360.274	1.37505	2.737	34.491	6.78	14.0552
34.249	7.86389	361.188	1.37506	2.738	34.491	6.54	14.0552
34.246	7.84389	362.102	1.37507	2.739	34.486	6.35	14.0552
34.245	7.80611	363.017	1.37508	2.74	34.479	5.85	14.0559
34.245	7.76944	363.931	1.37509	2.74	34.476	6.7	14.0559
34.246	7.73722	364.846	1.3751	2.739	34.477	5.89	14.0559
34.246	7.71056	365.76	1.39583	2.782	34.483	7.76	14.0488
34.245	7.71056	366.674	1.39584	2.782	34.481	8.42	14.051
34.247	7.70389	367.589	1.39586	2.782	34.482	7.28	14.0517
34.248	7.70056	368.503	1.39587	2.782	34.482	8.19	14.0517
34.246	7.68167	369.418	1.39588	2.782	34.482	9.02	14.0517
34.245	7.67222	370.332	1.39589	2.783	34.482	8	14.0524
34.245	7.67222	371.246	1.3959	2.783	34.48	8.19	14.0524
34.245	7.67222	372.161	1.39591	2.783	34.482	7.73	14.0524
34.246	7.66222	373.075	1.39593	2.783	34.481	7.72	14.0524
34.249	7.64333	373.99	1.39594	2.783	34.482	8.77	14.0524
34.251	7.64333	374.904	1.41667	2.748	34.485	8.95	14.0495
34.252	7.64333	375.818	1.41668	2.748	34.486	7.15	14.051
34.25	7.64333	376.733	1.41669	2.748	34.486	7.98	14.0517
34.246	7.61444	377.647	1.4167	2.748	34.485	12.55	14.0524
34.248	7.58667	378.562	1.41671	2.748	34.486	7.86	14.0524
34.248	7.53722	379.476	1.41672	2.748	34.485	6.77	14.0524
34.249	7.50889	380.39	1.41674	2.748	34.486	9.06	14.0524
34.25	7.49889	381.305	1.41675	2.749	34.486	8.87	14.0524
34.251	7.48944	382.219	1.41676	2.748	34.485	7.37	14.0524
34.252	7.48944	383.134	1.41677	2.748	34.486	7.82	14.0531
34.25	7.46056	384.048	1.4375	2.737	34.487	9.53	14.0488
34.247	7.43611	384.962	1.43751	2.737	34.487	9.28	14.051
34.244	7.43167	385.877	1.43752	2.737	34.487	7.22	14.051
34.242	7.4	386.791	1.43753	2.737	34.487	7.95	14.051
34.24	7.36444	387.706	1.43755	2.737	34.487	7.81	14.0517
34.24	7.345	388.62	1.43756	2.737	34.487	7.35	14.0524
34.24	7.32556	389.534	1.43757	2.737	34.487	7.08	14.0517
34.237	7.30667	390.449	1.43758	2.737	34.487	7.27	14.0524
34.237	7.29667	391.363	1.43759	2.736	34.488	9.37	14.0524
34.24	7.25222	392.278	1.4376	2.736	34.488	7.66	14.0517
34.24	7.23889	393.192	1.45833	2.758	34.484	7.16	14.0474
34.24	7.22944	394.106	1.45834	2.758	34.484	8.45	14.0495
34.239	7.22	395.021	1.45836	2.758	34.485	9.08	14.0495
34.237	7.22	395.935	1.45837	2.758	34.485	6.4	14.0502
34.237	7.205	396.85	1.45838	2.758	34.485	8.93	14.0502
34.236	7.19056	397.764	1.45839	2.758	34.485	7.03	14.051
34.235	7.17167	398.678	1.4584	2.758	34.482	7.24	14.051
34.239	7.17167	399.593	1.45841	2.758	34.484	8	14.0517
34.236	7.14278	400.507	1.45843	2.758	34.485	7.65	14.051
34.233	7.11833	401.422	1.45844	2.758	34.484	7.48	14.051
34.235	7.085	402.336	1.47917	2.756	34.45	335.11	14.0467
34.238	7.085	403.25	1.47918	2.759	34.448	420.64	14.0488
34.236	7.075	404.165	1.47919	2.754	34.452	285.06	14.0495
34.235	7.06556	405.079	1.4792	2.755	34.451	431.94	14.0502
34.236	7.04611	405.994	1.47921	2.755	34.449	314.28	14.0502
34.236	7.01833	406.908	1.47922	2.759	34.447	492.46	14.0502
34.235	7.01722	407.822	1.47924	2.761	34.438	459.82	14.051
34.232	7.00778	408.737	1.47925	2.761	34.441	565.66	14.0502
34.231	6.98833	409.651	1.47926	2.768	34.425	667.93	14.051
34.234	6.97833	410.566	1.47927	2.763	34.423	591.22	14.051
34.233	6.97056	411.48	1.5	2.791	34.475	84.53	14.0467
34.231	6.96889	412.394	1.50001	2.79	34.475	87.37	14.0488
34.232	6.94944	413.309	1.50002	2.791	34.475	97.57	14.0488
34.231	6.93944	414.223	1.50003	2.791	34.475	93.89	14.0488
34.229	6.91111	415.138	1.50005	2.791	34.475	83.84	14.0495
34.233	6.90111	416.052	1.50006	2.79	34.475	85.41	14.0495
34.236	6.89167	416.966	1.50007	2.789	34.476	84.29	14.0495
34.233	6.88167	417.881	1.50008	2.789	34.476	85.21	14.0495
34.231	6.88167	418.795	1.50009	2.789	34.476	89.69	14.0495
34.232	6.86833	419.71	1.5001	2.789	34.476	80.34	14.0502
34.237	6.85278	420.624	1.52083	2.792	34.48	30.52	14.0445
34.237	6.85278	421.538	1.52084	2.792	34.48	35.58	14.0467
34.235	6.84333	422.453	1.52086	2.791	34.48	36.46	14.0474
34.239	6.83333	423.367	1.52087	2.791	34.48	34.7	14.0481
34.236	6.83333	424.282	1.52088	2.791	34.48	33.73	14.0481
34.236	6.82222	425.196	1.52089	2.791	34.477	24.95	14.0488
34.239	6.81444	426.11	1.5209	2.791	34.477	33.47	14.0481
34.237	6.79833	427.025	1.52091	2.79	34.479	32.35	14.0488
34.233	6.74667	427.939	1.52093	2.789	34.482	43.83	14.0481
34.235	6.73667	428.854	1.52094	2.79	34.481	41.06	14.0488
34.241	6.71889	429.768	1.54167	2.793	34.48	20.28	14.0467
34.24	6.70778	430.682	1.54168	2.793	34.481	20.67	14.0488
34.235	6.68833	431.597	1.54169	2.793	34.48	23.78	14.0488
34.236	6.67889	432.511	1.5417	2.793	34.481	21.21	14.0488
34.236	6.66889	433.426	1.54171	2.793	34.481	22.86	14.0495
34.236	6.66056	434.34	1.54172	2.793	34.481	20.78	14.0495
34.238	6.65944	435.254	1.54174	2.793	34.48	22.08	14.0502
34.239	6.65944	436.169	1.54175	2.793	34.481	20.63	14.0502
34.237	6.64944	437.083	1.54176	2.793	34.481	20.04	14.0502
34.239	6.64	437.998	1.54177	2.793	34.481	21.62	14.0502
34.245	6.63056	438.912	1.5625	2.799	34.48	16.28	14.0467
34.246	6.63056	439.826	1.56251	2.799	34.481	13.96	14.0481
34.24	6.63056	440.741	1.56252	2.799	34.48	13.87	14.0488
34.237	6.62056	441.655	1.56253	2.799	34.48	14.58	14.0488
34.241	6.61556	442.57	1.56255	2.799	34.481	14.27	14.0495
34.242	6.61111	443.484	1.56256	2.799	34.481	16.38	14.0488
34.241	6.61111	444.398	1.56257	2.799	34.481	15.22	14.0495
34.24	6.61111	445.313	1.56258	2.799	34.481	14.74	14.0495
34.239	6.60111	446.227	1.56259	2.799	34.48	16.86	14.0495
34.242	6.60111	447.142	1.5626	2.799	34.48	14.66	14.0495
34.244	6.59167	448.056	1.58333	2.8	34.48	8.6	14.0474
34.242	6.59167	448.97	1.58334	2.8	34.481	9.6	14.0495
34.24	6.59	449.885	1.58336	2.8	34.48	9.9	14.0495
34.242	6.57222	450.799	1.58337	2.8	34.481	9.47	14.0502
34.24	6.55611	451.714	1.58338	2.8	34.481	9.28	14.0502
34.237	6.51333	452.628	1.58339	2.8	34.481	10.25	14.0502
34.239	6.49444	453.542	1.5834	2.8	34.481	11.16	14.0502
34.243	6.49444	454.457	1.58341	2.8	34.481	8.93	14.0502
34.241	6.485	455.371	1.58343	2.8	34.481	10.41	14.0502
34.24	6.485	456.286	1.58344	2.8	34.481	9.49	14.051
34.244	6.45556	457.2	1.60417	2.806	34.48	6.7	14.0502
34.245	6.43611	458.114	1.60418	2.806	34.48	6.64	14.0517
34.242	6.42667	459.029	1.60419	2.806	34.48	9.6	14.0524
34.245	6.39778	459.943	1.6042	2.806	34.479	7.57	14.0531
34.247	6.40556	460.858	1.60421	2.806	34.479	7.22	14.0531
34.242	6.37833	461.772	1.60422	2.806	34.48	7.88	14.0531
34.241	6.37167	462.686	1.60424	2.806	34.479	7.12	14.0531
34.243	6.36722	463.601	1.60425	2.806	34.479	9.91	14.0531
34.244	6.34889	464.515	1.60426	2.806	34.479	6.58	14.0538
34.242	6.33944	465.43	1.60427	2.806	34.48	7.34	14.0531
34.24	6.33944	466.344	1.625	2.81	34.48	5.4	14.0517
34.242	6.32944	467.258	1.62501	2.81	34.48	4.92	14.0531
34.245	6.30389	468.173	1.62502	2.81	34.481	6.29	14.0538
34.248	6.24222	469.087	1.62503	2.811	34.48	5.59	14.0538
34.248	6.22333	470.002	1.62505	2.81	34.479	4.52	14.0545
34.247	6.22278	470.916	1.62506	2.81	34.479	5.37	14.0545
34.249	6.22278	471.83	1.62507	2.81	34.48	5.08	14.0545
34.25	6.22278	472.745	1.62508	2.811	34.48	5.51	14.0545
34.248	6.22278	473.659	1.62509	2.811	34.48	4.61	14.0545
34.245	6.22278	474.574	1.6251	2.811	34.48	4.25	14.0552
34.245	6.22278	475.488	1.64583	2.82	34.48	2.76	14.0524
34.246	6.22278	476.402	1.64584	2.82	34.48	2.73	14.0552
34.246	6.22278	477.317	1.64586	2.82	34.479	2.82	14.0552
34.249	6.21278	478.231	1.64587	2.82	34.479	2.88	14.0559
34.252	6.21278	479.146	1.64588	2.82	34.48	2.86	14.0566
34.25	6.20333	480.06	1.64589	2.82	34.48	2.98	14.0559
34.249	6.19167	480.974	1.6459	2.82	34.48	3.02	14.0559
34.249	6.16444	481.889	1.64591	2.82	34.48	3.08	14.0559
34.249	6.15444	482.803	1.64593	2.82	34.48	3.21	14.0559
34.249	6.145	483.718	1.64594	2.82	34.48	3.21	14.0566
34.25	6.145	484.632	1.66667	2.813	34.48	5.31	14.0524
34.25	6.145	485.546	1.66668	2.813	34.48	3.81	14.0552
34.25	6.135	486.461	1.66669	2.813	34.478	6.11	14.0552
34.252	6.12333	487.375	1.6667	2.813	34.478	4.58	14.0552
34.253	6.11556	488.29	1.66671	2.813	34.48	3.97	14.0552
34.25	6.08611	489.204	1.66672	2.813	34.479	4.57	14.0559
34.25	6.06667	490.118	1.66674	2.813	34.48	3.69	14.0559
34.254	6.05722	491.033	1.66675	2.813	34.48	4.71	14.0559
34.252	6.04389	491.947	1.66676	2.813	34.481	3.52	14.0566
34.251	6.03778	492.862	1.66677	2.813	34.48	4.11	14.0559
34.252	6.02778	493.776	1.6875	2.811	34.48	7.15	14.0538
34.251	6.01833	494.69	1.68751	2.811	34.48	7.67	14.0559
34.251	6.01833	495.605	1.68752	2.81	34.48	13.25	14.0559
34.247	6.00833	496.519	1.68753	2.81	34.48	6.8	14.0566
34.248	5.99889	497.434	1.68755	2.811	34.48	16.69	14.0573
34.254	5.98889	498.348	1.68756	2.811	34.48	7.89	14.0573
34.26	5.96944	499.262	1.68757	2.81	34.48	8.81	14.0573
34.263	5.96944	500.177	1.68758	2.811	34.479	10	14.0566
34.255	5.96944	501.091	1.68759	2.811	34.48	5.91	14.0581
34.25	5.96944	502.006	1.6876	2.811	34.481	17.9	14.0573
34.25	5.95	502.92	1.70833	2.814	34.481	4.7	14.0552
34.252	5.91111	503.834	1.70834	2.814	34.481	4.61	14.0573
34.253	5.90111	504.749	1.70836	2.814	34.481	4.93	14.0581
34.253	5.88167	505.663	1.70837	2.814	34.481	4.58	14.0588
34.259	5.87167	506.578	1.70838	2.814	34.481	5.27	14.0588
34.261	5.85222	507.492	1.70839	2.814	34.481	5.28	14.0588
34.258	5.84278	508.406	1.7084	2.814	34.481	4.73	14.0588
34.26	5.83278	509.321	1.70841	2.814	34.481	5.5	14.0588
34.265	5.82333	510.235	1.70843	2.814	34.481	5.47	14.0595
34.266	5.82333	511.15	1.70844	2.814	34.481	6.04	14.0595
34.266	5.82333	512.064	1.72917	2.823	34.479	3.82	14.0552
34.264	5.82333	512.978	1.72918	2.823	34.479	4.2	14.0559
34.263	5.81333	513.893	1.72919	2.823	34.479	4	14.0566
34.261	5.81333	514.807	1.7292	2.823	34.479	4.44	14.0573
34.258	5.80556	515.722	1.72921	2.823	34.48	4.99	14.0573
34.261	5.77444	516.636	1.72922	2.823	34.479	4.49	14.0581
34.263	5.755	517.55	1.72924	2.823	34.479	6.1	14.0581
34.263	5.755	518.465	1.72925	2.823	34.48	4.25	14.0581
34.264	5.745	519.379	1.72926	2.823	34.479	3.91	14.0581
34.266	5.735	520.294	1.72927	2.823	34.479	3.4	14.0581
34.269	5.72556	521.208	1.75	2.834	34.478	4.22	14.0552
34.263	5.72556	522.122	1.75001	2.834	34.477	4.49	14.0573
34.26	5.71944	523.037	1.75002	2.834	34.474	5.03	14.0573
34.263	5.71556	523.951	1.75003	2.834	34.472	4.35	14.0573
34.263	5.71556	524.866	1.75005	2.834	34.477	4.99	14.0581
34.267	5.70889	525.78	1.75006	2.834	34.477	3.98	14.0588
34.268	5.69278	526.694	1.75007	2.834	34.476	5.92	14.0588
34.268	5.64722	527.609	1.75008	2.834	34.477	4.9	14.0588
34.269	5.63667	528.523	1.75009	2.834	34.477	4.45	14.0588
34.268	5.58833	529.438	1.7501	2.834	34.475	4.03	14.0588
34.268	5.55889	530.352	1.77083	2.835	34.477	4.6	14.0545
34.269	5.54944	531.266	1.77084	2.835	34.478	3.91	14.0559
34.271	5.53111	532.181	1.77086	2.835	34.477	4.46	14.0566
34.268	5.50667	533.095	1.77087	2.835	34.477	4.03	14.0573
34.267	5.49056	534.01	1.77088	2.835	34.476	3.95	14.0573
34.27	5.48833	534.924	1.77089	2.835	34.477	4.65	14.0581
34.273	5.48056	535.838	1.7709	2.835	34.477	4.07	14.0573
34.272	5.47111	536.753	1.77091	2.835	34.477	3.62	14.0581
34.271	5.46111	537.667	1.77093	2.835	34.477	4.07	14.0581
34.274	5.45222	538.582	1.77094	2.835	34.478	4.49	14.0581
34.276	5.45167	539.496	1.79167	2.834	34.477	2.15	14.0538
34.275	5.45167	540.41	1.79168	2.834	34.478	2.16	14.0552
34.272	5.43722	541.325	1.79169	2.834	34.477	2.22	14.0559
34.273	5.42222	542.239	1.7917	2.834	34.478	2.24	14.0573
34.275	5.42222	543.154	1.79171	2.834	34.477	2.19	14.0566
34.276	5.42222	544.068	1.79172	2.834	34.478	2.19	14.0573
34.275	5.415	544.982	1.79174	2.835	34.478	2.19	14.0573
34.276	5.415	545.897	1.79175	2.834	34.478	2.21	14.0566
34.276	5.41222	546.811	1.79176	2.835	34.478	2.22	14.0581
34.278	5.41556	547.726	1.79177	2.834	34.478	2.25	14.0588
34.28	5.41222	548.64	1.8125	2.831	34.478	3.56	14.0531
34.28	5.41222	549.554	1.81251	2.831	34.478	3.49	14.0552
34.282	5.40222	550.469	1.81252	2.831	34.478	3.47	14.0552
34.28	5.38278	551.383	1.81253	2.831	34.478	3.42	14.0559
34.276	5.37333	552.298	1.81255	2.831	34.478	3.56	14.0566
34.275	5.35889	553.212	1.81256	2.831	34.478	3.69	14.0566
34.275	5.34444	554.126	1.81257	2.831	34.478	3.74	14.0566
34.274	5.34333	555.041	1.81258	2.831	34.478	3.61	14.0573
34.277	5.34333	555.955	1.81259	2.831	34.478	3.49	14.0573
34.281	5.33389	556.87	1.8126	2.831	34.478	3.43	14.0573
34.281	5.33389	557.784	1.83333	2.833	34.477	4.23	14.0524
34.277	5.33389	558.698	1.83334	2.833	34.477	3.72	14.0552
34.271	5.33389	559.613	1.83336	2.833	34.477	3.49	14.0559
34.273	5.33389	560.527	1.83337	2.833	34.477	3.81	14.0559
34.277	5.33389	561.442	1.83338	2.833	34.478	3.85	14.0559
34.277	5.32389	562.356	1.83339	2.833	34.478	3.46	14.0566
34.277	5.32389	563.27	1.8334	2.833	34.477	4.39	14.0566
34.273	5.32389	564.185	1.83341	2.833	34.477	3.52	14.0566
34.276	5.32389	565.099	1.83343	2.833	34.478	3.93	14.0566
34.281	5.31389	566.014	1.83344	2.833	34.478	3.93	14.0573
34.282	5.29889	566.928	1.85417	2.834	34.477	3.56	14.0524
34.282	5.29444	567.842	1.85418	2.834	34.477	3.58	14.0538
34.283	5.29444	568.757	1.85419	2.834	34.477	3.36	14.0545
34.285	5.28611	569.671	1.8542	2.834	34.477	4.03	14.0552
34.285	5.28444	570.586	1.85421	2.834	34.478	2.98	14.0552
34.281	5.28444	571.5	1.85422	2.834	34.477	3.52	14.0545
34.278	5.28444	572.414	1.85424	2.834	34.478	3.05	14.0559
34.281	5.275	573.329	1.85425	2.834	34.478	2.89	14.0559
34.283	5.275	574.243	1.85426	2.834	34.478	3.04	14.0559
34.284	5.275	575.158	1.85427	2.834	34.478	3.69	14.0559
34.284	5.275	576.072	1.875	2.834	34.477	3.11	14.051
34.284	5.275	576.986	1.87501	2.834	34.477	3.23	14.0517
34.284	5.275	577.901	1.87502	2.834	34.477	3.18	14.0524
34.284	5.26889	578.815	1.87503	2.834	34.477	3.21	14.0531
34.286	5.27444	579.73	1.87505	2.834	34.477	3.42	14.0531
34.285	5.24556	580.644	1.87506	2.834	34.477	3.56	14.0531
34.285	5.24556	581.558	1.87507	2.834	34.477	3.58	14.0531
34.283	5.24556	582.473	1.87508	2.834	34.478	3.33	14.0538
34.281	5.23556	583.387	1.87509	2.834	34.478	3.47	14.0538
34.282	5.23556	584.302	1.8751	2.834	34.478	3.23	14.0545
34.286	5.22667	585.216	1.89583	2.834	34.477	3.04	14.0488
34.288	5.22556	586.13	1.89584	2.834	34.477	3.15	14.051
34.285	5.21611	587.045	1.89586	2.834	34.477	2.98	14.0517
34.284	5.21611	587.959	1.89587	2.834	34.477	2.79	14.0517
34.286	5.20611	588.874	1.89588	2.834	34.477	2.7	14.0517
34.287	5.19611	589.788	1.89589	2.834	34.477	2.76	14.0524
34.291	5.17667	590.702	1.8959	2.834	34.477	2.92	14.0517
34.292	5.16667	591.617	1.89591	2.834	34.477	2.92	14.0524
34.29	5.15889	592.531	1.89593	2.834	34.477	2.98	14.0531
34.29	5.13722	593.446	1.89594	2.834	34.478	3.11	14.0524
34.29	5.13722	594.36	1.91667	2.827	34.479	4.84	14.0474
34.292	5.13722	595.274	1.91668	2.827	34.478	3.39	14.0495
34.296	5.12722	596.189	1.91669	2.827	34.478	3.94	14.0495
34.297	5.12722	597.103	1.9167	2.827	34.478	4.55	14.0502
34.292	5.12722	598.018	1.91671	2.827	34.478	3.93	14.0502
34.288	5.12722	598.932	1.91672	2.827	34.478	4.46	14.0502
34.289	5.12111	599.846	1.91674	2.827	34.478	3.62	14.051
34.29	5.11778	600.761	1.91675	2.827	34.478	3.74	14.0502
34.294	5.11167	601.675	1.91676	2.827	34.478	4.3	14.051
34.297	5.10778	602.59	1.91677	2.827	34.478	4.14	14.051
34.292	5.10778	603.504	1.9375	2.828	34.478	3.98	14.046
34.291	5.09722	604.418	1.93751	2.829	34.478	5.31	14.0481
34.293	5.07833	605.333	1.93752	2.828	34.478	6.07	14.0488
34.295	5.07778	606.247	1.93753	2.828	34.478	3.77	14.0481
34.295	5.06833	607.162	1.93755	2.828	34.478	3.82	14.0495
34.293	5.05833	608.076	1.93756	2.829	34.478	3.79	14.0495
34.297	5.04889	608.99	1.93757	2.829	34.478	3.59	14.0495
34.299	5.02889	609.905	1.93758	2.829	34.478	4.32	14.0495
34.299	5.01944	610.819	1.93759	2.829	34.478	4.55	14.0495
34.298	5.01944	611.734	1.9376	2.829	34.478	3.81	14.0502
34.3	5.01444	612.648	1.95833	2.827	34.479	3.55	14.0431
34.304	5.00944	613.562	1.95834	2.827	34.478	3.5	14.0452
34.3	5.00444	614.477	1.95836	2.827	34.479	4.87	14.0452
34.296	4.99944	615.391	1.95837	2.827	34.479	4.67	14.046
34.296	4.99944	616.306	1.95838	2.827	34.479	3.97	14.0467
34.299	4.99	617.22	1.95839	2.827	34.479	4.06	14.0467
34.3	4.98944	618.134	1.9584	2.828	34.478	5.56	14.0467
34.299	4.98944	619.049	1.95841	2.828	34.478	4.57	14.0474
34.303	4.985	619.963	1.95843	2.828	34.478	4.6	14.0467
34.305	4.98	620.878	1.95844	2.828	34.478	3.59	14.0467
34.304	4.98944	621.792	1.97917	2.825	34.479	7.53	14.0424
34.303	4.98944	622.706	1.97918	2.825	34.478	6.17	14.0445
34.306	4.98	623.621	1.97919	2.825	34.478	6.68	14.0438
34.305	4.98	624.535	1.9792	2.825	34.477	6.19	14.0452
34.305	4.98	625.45	1.97921	2.825	34.478	6.65	14.0452
34.307	4.98	626.364	1.97922	2.825	34.478	6.39	14.046
34.307	4.98	627.278	1.97924	2.825	34.478	6.84	14.046
34.306	4.98	628.193	1.97925	2.825	34.478	5.94	14.046
34.307	4.98	629.107	1.97926	2.825	34.478	5.86	14.0452
34.305	4.98	630.022	1.97927	2.825	34.478	6.02	14.0452
34.303	4.98	630.936	2	2.824	34.478	6.02	14.0431
34.303	4.98	631.85	2.00001	2.825	34.478	6.29	14.0452
34.303	4.98	632.765	2.00002	2.825	34.479	6.81	14.046
34.305	4.98	633.679	2.00003	2.825	34.478	7.89	14.046
34.304	4.98	634.594	2.00005	2.825	34.479	6.17	14.0467
34.303	4.98	635.508	2.00006	2.825	34.478	6.29	14.0467
34.301	4.98	636.422	2.00007	2.825	34.479	6.55	14.0474
34.301	4.98	637.337	2.00008	2.825	34.479	8.19	14.0467
34.303	4.975	638.251	2.00009	2.825	34.479	8.48	14.0467
34.303	4.97944	639.166	2.0001	2.825	34.479	7.97	14.0467
34.304	4.975	640.08	2.02083	2.824	34.477	7.34	14.0424
34.307	4.97	640.994	2.02084	2.824	34.478	7.38	14.046
34.305	4.97	641.909	2.02086	2.824	34.478	6.93	14.0452
34.299	4.97	642.823	2.02087	2.824	34.479	8.46	14.046
34.3	4.96	643.738	2.02088	2.824	34.479	7.44	14.0467
34.304	4.96	644.652	2.02089	2.824	34.479	6.89	14.0467
34.304	4.96	645.566	2.0209	2.824	34.479	6.56	14.0467
34.304	4.96	646.481	2.02091	2.824	34.479	6.9	14.0474
34.306	4.95444	647.395	2.02093	2.824	34.478	8.36	14.0474
34.304	4.95	648.31	2.02094	2.825	34.479	6.99	14.0467
34.301	4.94444	649.224	2.04167	2.824	34.477	6.68	14.0424
34.304	4.94056	650.138	2.04168	2.824	34.478	7.97	14.0445
34.304	4.94056	651.053	2.04169	2.824	34.478	6.61	14.0452
34.303	4.94056	651.967	2.0417	2.824	34.476	6.14	14.0445
34.304	4.94056	652.882	2.04171	2.824	34.476	6.51	14.0452
34.306	4.93167	653.796	2.04172	2.824	34.477	6.61	14.0452
34.309	4.93056	654.71	2.04174	2.824	34.477	6.54	14.046
34.31	4.93056	655.625	2.04175	2.824	34.477	5.95	14.046
34.306	4.93056	656.539	2.04176	2.824	34.477	6.59	14.046
34.306	4.93056	657.454	2.04177	2.824	34.477	5.83	14.046
34.307	4.93056	658.368	2.0625	2.824	34.478	6.97	14.0431
34.306	4.92833	659.282	2.06251	2.824	34.478	6.62	14.0452
34.304	4.91056	660.197	2.06252	2.824	34.479	5.89	14.0452
34.303	4.90111	661.111	2.06253	2.824	34.478	5.78	14.046
34.307	4.89111	662.026	2.06255	2.824	34.478	6.21	14.046
34.307	4.88111	662.94	2.06256	2.824	34.478	6.4	14.046
34.304	4.88111	663.854	2.06257	2.824	34.478	6.2	14.0467
34.309	4.855	664.769	2.06258	2.824	34.478	6.23	14.0467
34.314	4.85167	665.683	2.06259	2.824	34.478	6.59	14.0467
34.313	4.85167	666.598	2.0626	2.824	34.478	6.86	14.046
34.311	4.85167	667.512	2.08333	2.825	34.478	5.81	14.0431
34.308	4.84167	668.426	2.08334	2.825	34.478	5.5	14.0452
34.31	4.84111	669.341	2.08336	2.826	34.478	5.6	14.0467
34.313	4.82778	670.255	2.08337	2.826	34.478	5.48	14.0467
34.311	4.83167	671.17	2.08338	2.826	34.478	5.41	14.0474
34.314	4.81222	672.084	2.08339	2.826	34.478	5.47	14.0474
34.316	4.81222	672.998	2.0834	2.826	34.478	5.43	14.0474
34.311	4.80222	673.913	2.08341	2.826	34.478	5.02	14.0481
34.307	4.80222	674.827	2.08343	2.826	34.478	5.44	14.0481
34.307	4.80222	675.742	2.08344	2.826	34.478	5.37	14.0481
34.306	4.80222	676.656	2.10417	2.825	34.477	5.97	14.0467
34.307	4.80222	677.57	2.10418	2.825	34.477	5.82	14.0488
34.308	4.80222	678.485	2.10419	2.825	34.477	8.92	14.0488
34.309	4.80222	679.399	2.1042	2.825	34.478	7.73	14.0488
34.307	4.80222	680.314	2.10421	2.825	34.477	6.4	14.0495
34.305	4.80222	681.228	2.10422	2.825	34.478	6.2	14.0495
34.306	4.80222	682.142	2.10424	2.825	34.477	5.97	14.0495
34.312	4.8	683.057	2.10425	2.825	34.477	6.51	14.0495
34.314	4.79556	683.971	2.10426	2.825	34.477	7.25	14.0502
34.31	4.80222	684.886	2.10427	2.825	34.478	6.27	14.0502
34.312	4.79222	685.8	2.125	2.825	34.475	7.21	14.0452
34.312	4.79222	686.714	2.12501	2.825	34.476	6.04	14.0481
34.311	4.79222	687.629	2.12502	2.825	34.475	6.23	14.0488
34.311	4.79222	688.543	2.12503	2.825	34.476	6.89	14.0488
34.312	4.79222	689.458	2.12505	2.825	34.476	6.73	14.0488
34.315	4.79222	690.372	2.12506	2.825	34.477	6.26	14.0502
34.317	4.78278	691.286	2.12507	2.825	34.477	8.36	14.0502
34.314	4.77167	692.201	2.12508	2.825	34.477	6.24	14.0502
34.315	4.75278	693.115	2.12509	2.825	34.478	7.21	14.051
34.317	4.74167	694.03	2.1251	2.825	34.478	8.33	14.0502
34.32	4.73	694.944	2.14583	2.833	34.476	5.48	14.0474
34.32	4.72333	695.858	2.14584	2.833	34.476	4.89	14.0502
34.32	4.72333	696.773	2.14586	2.833	34.477	5.54	14.0502
34.322	4.71333	697.687	2.14587	2.834	34.476	4.46	14.051
34.319	4.71333	698.602	2.14588	2.834	34.476	5.15	14.051
34.318	4.71333	699.516	2.14589	2.834	34.477	4.77	14.0524
34.321	4.70333	700.43	2.1459	2.834	34.476	5.43	14.0517
34.321	4.70333	701.345	2.14591	2.834	34.476	5.37	14.0517
34.319	4.70333	702.259	2.14593	2.834	34.476	5.57	14.0517
34.321	4.68389	703.174	2.14594	2.834	34.477	7.41	14.0517
34.325	4.68333	704.088	2.16667	2.842	34.478	4.35	14.0502
34.325	4.67389	705.002	2.16668	2.842	34.478	4.62	14.0517
34.325	4.66389	705.917	2.16669	2.842	34.477	4.83	14.0524
34.328	4.65389	706.831	2.1667	2.842	34.478	4.54	14.0531
34.327	4.65389	707.746	2.16671	2.842	34.477	5.25	14.0524
34.321	4.65389	708.66	2.16672	2.842	34.478	5.03	14.0531
34.32	4.64167	709.574	2.16674	2.841	34.477	4.46	14.0531
34.325	4.62611	710.489	2.16675	2.841	34.477	5.19	14.0531
34.329	4.62444	711.403	2.16676	2.842	34.477	4.95	14.0531
34.331	4.61556	712.318	2.16677	2.842	34.478	6.11	14.0524
34.331	4.61444	713.232	2.1875	2.848	34.476	4.38	14.051
34.33	4.61444	714.146	2.18751	2.848	34.477	5.21	14.0531
34.327	4.61444	715.061	2.18752	2.848	34.476	4.45	14.0538
34.326	4.60444	715.975	2.18753	2.848	34.476	4.58	14.0538
34.328	4.60444	716.89	2.18755	2.848	34.476	4.54	14.0552
34.329	4.60444	717.804	2.18756	2.848	34.476	4.38	14.0545
34.33	4.60167	718.718	2.18757	2.848	34.476	4.41	14.0545
34.328	4.595	719.633	2.18758	2.848	34.476	4.64	14.0552
34.325	4.595	720.547	2.18759	2.848	34.477	4.13	14.0552
34.323	4.58833	721.462	2.1876	2.848	34.476	4.07	14.0552
34.323	4.595	722.376	2.20833	2.854	34.476	3.68	14.0531
34.324	4.595	723.29	2.20834	2.854	34.475	3.49	14.0552
34.327	4.585	724.205	2.20836	2.854	34.475	3.65	14.0552
34.328	4.585	725.119	2.20837	2.854	34.476	4.03	14.0559
34.327	4.585	726.034	2.20838	2.854	34.476	4.41	14.0559
34.329	4.57889	726.948	2.20839	2.854	34.476	3.81	14.0559
34.33	4.57333	727.862	2.2084	2.854	34.476	3.82	14.0559
34.335	4.54556	728.777	2.20841	2.854	34.476	3.65	14.0566
34.339	4.53556	729.691	2.20843	2.854	34.476	4.2	14.0566
34.339	4.53556	730.606	2.20844	2.854	34.475	4.44	14.0566
34.334	4.53556	731.52	2.22917	2.844	34.478	4.52	14.0538
34.333	4.52556	732.434	2.22918	2.842	34.48	4.97	14.0559
34.338	4.51556	733.349	2.22919	2.841	34.482	3.45	14.0559
34.336	4.50611	734.263	2.2292	2.843	34.479	3.71	14.0566
34.337	4.50556	735.178	2.22921	2.843	34.479	3.82	14.0573
34.342	4.50556	736.092	2.22922	2.843	34.479	3.58	14.0573
34.342	4.50556	737.006	2.22924	2.843	34.479	3.63	14.0573
34.342	4.50833	737.921	2.22925	2.842	34.479	3.81	14.0573
34.342	4.50556	738.835	2.22926	2.843	34.479	3.75	14.0573
34.336	4.51167	739.75	2.22927	2.843	34.479	3.68	14.0581
34.331	4.50556	740.664	2.25	2.826	34.478	4.19	14.0545
34.332	4.50556	741.578	2.25001	2.826	34.478	5.4	14.0566
34.333	4.50556	742.493	2.25002	2.827	34.479	4.77	14.0573
34.334	4.50167	743.407	2.25003	2.827	34.479	4.36	14.0573
34.333	4.50389	744.322	2.25005	2.827	34.479	4.65	14.0581
34.336	4.49611	745.236	2.25006	2.827	34.479	3.95	14.0581
34.338	4.48611	746.15	2.25007	2.827	34.477	5.06	14.0581
34.336	4.48611	747.065	2.25008	2.826	34.479	4.48	14.0588
34.336	4.47611	747.979	2.25009	2.826	34.478	4.23	14.0588
34.337	4.47611	748.894	2.2501	2.826	34.479	4.44	14.0581
34.338	4.47611	749.808	2.27083	2.829	34.478	5.09	14.0545
34.34	4.46611	750.722	2.27084	2.829	34.477	4.35	14.0573
34.34	4.45944	751.637	2.27086	2.829	34.478	4.16	14.0573
34.342	4.45611	752.551	2.27087	2.829	34.477	5.13	14.0573
34.341	4.44611	753.466	2.27088	2.829	34.478	4.54	14.0573
34.339	4.43667	754.38	2.27089	2.829	34.478	4.38	14.0581
34.343	4.43556	755.294	2.2709	2.829	34.478	5.76	14.0573
34.345	4.42667	756.209	2.27091	2.829	34.478	4.73	14.0581
34.343	4.42667	757.123	2.27093	2.829	34.478	4.29	14.0588
34.34	4.41667	758.038	2.27094	2.829	34.477	4.25	14.0581
34.343	4.415	758.952	2.29167	2.831	34.478	4.6	14.0552
34.347	4.40667	759.866	2.29168	2.831	34.478	3.93	14.0573
34.347	4.39944	760.781	2.29169	2.831	34.478	3.82	14.0573
34.345	4.39667	761.695	2.2917	2.831	34.478	4.03	14.0573
34.344	4.39111	762.61	2.29171	2.831	34.478	3.87	14.0581
34.347	4.38667	763.524	2.29172	2.831	34.478	5.08	14.0581
34.35	4.38667	764.438	2.29174	2.831	34.478	4.9	14.0588
34.349	4.37667	765.353	2.29175	2.831	34.478	4.23	14.0588
34.349	4.36722	766.267	2.29176	2.831	34.478	4.39	14.0588
34.35	4.36722	767.182	2.29177	2.831	34.478	3.98	14.0588
34.35	4.36722	768.096	2.3125	2.838	34.477	3.24	14.0538
34.35	4.36278	769.01	2.31251	2.838	34.477	3.42	14.0559
34.35	4.36722	769.925	2.31252	2.838	34.477	3.95	14.0566
34.35	4.36167	770.839	2.31253	2.838	34.477	3.42	14.0566
34.348	4.35722	771.754	2.31255	2.838	34.476	2.85	14.0573
34.35	4.34722	772.668	2.31256	2.838	34.475	3.05	14.0573
34.352	4.33444	773.582	2.31257	2.838	34.476	3.66	14.0581
34.352	4.32611	774.497	2.31258	2.838	34.476	3.56	14.0581
34.353	4.31722	775.411	2.31259	2.838	34.476	3.1	14.0581
34.353	4.30722	776.326	2.3126	2.838	34.475	3.45	14.0581
34.354	4.30722	777.24	2.33333	2.845	34.477	2.7	14.0552
34.353	4.29889	778.154	2.33334	2.846	34.477	2.62	14.0573
34.356	4.29778	779.069	2.33336	2.845	34.477	3.08	14.0573
34.355	4.29778	779.983	2.33337	2.846	34.477	4.38	14.0581
34.353	4.28778	780.898	2.33338	2.846	34.478	3.18	14.0588
34.354	4.27778	781.812	2.33339	2.846	34.478	3.69	14.0581
34.355	4.26778	782.726	2.3334	2.846	34.477	3.93	14.0581
34.358	4.25778	783.641	2.33341	2.846	34.477	3.01	14.0588
34.354	4.25778	784.555	2.33343	2.846	34.477	2.57	14.0588
34.349	4.25778	785.47	2.33344	2.846	34.477	2.56	14.0588
34.353	4.24778	786.384	2.35417	2.838	34.478	3.4	14.0531
34.358	4.22778	787.298	2.35418	2.838	34.477	2.83	14.0552
34.36	4.22778	788.213	2.35419	2.838	34.477	3.24	14.0559
34.358	4.21833	789.127	2.3542	2.838	34.478	3.02	14.0559
34.357	4.21833	790.042	2.35421	2.838	34.477	3.14	14.0559
34.358	4.20556	790.956	2.35422	2.838	34.477	2.64	14.0559
34.36	4.19667	791.87	2.35424	2.838	34.477	2.96	14.0559
34.361	4.18833	792.785	2.35425	2.838	34.477	2.91	14.0566
34.361	4.17833	793.699	2.35426	2.838	34.477	3.31	14.0566
34.361	4.16833	794.614	2.35427	2.838	34.477	2.72	14.0566
34.361	4.16833	795.528	2.375	2.855	34.475	2.62	14.0517
34.361	4.16833	796.442	2.37501	2.855	34.475	2.16	14.0538
34.36	4.16833	797.357	2.37502	2.855	34.475	2.41	14.0545
34.36	4.16833	798.271	2.37503	2.855	34.475	2.85	14.0545
34.359	4.16833	799.186	2.37505	2.855	34.475	2.48	14.0545
34.359	4.16833	800.1	2.37506	2.855	34.475	2.31	14.0552
34.358	4.16833	801.014	2.37507	2.855	34.475	3.69	14.0552
34.359	4.16833	801.929	2.37508	2.855	34.474	3.24	14.0559
34.359	4.16833	802.843	2.37509	2.855	34.474	2.37	14.0552
34.358	4.16833	803.758	2.3751	2.855	34.475	2.32	14.0552
34.358	4.16833	804.672	2.39583	2.86	34.475	2.32	14.0517
34.359	4.16833	805.586	2.39584	2.86	34.475	3.23	14.0524
34.358	4.16833	806.501	2.39586	2.86	34.474	2.14	14.0531
34.358	4.16833	807.415	2.39587	2.86	34.475	2.08	14.0538
34.361	4.16444	808.33	2.39588	2.86	34.475	3.31	14.0538
34.359	4.16833	809.244	2.39589	2.86	34.475	2	14.0538
34.358	4.16444	810.158	2.3959	2.86	34.475	2.34	14.0538
34.358	4.16667	811.073	2.39591	2.86	34.475	2.48	14.0545
34.363	4.15833	811.987	2.39593	2.86	34.475	3.65	14.0545
34.362	4.16222	812.902	2.39594	2.86	34.475	2.5	14.0545
34.361	4.16833	813.816		NA	NA	NA	NA
34.362	4.15833	814.73	NA	NA	NA	NA	NA
34.361	4.15833	815.645	NA	NA	NA	NA	NA
34.361	4.15833	816.559	NA	NA	NA	NA	NA
34.363	4.15833	817.474	NA	NA	NA	NA	NA
34.366	4.14833	818.388	NA	NA	NA	NA	NA
34.363	4.14833	819.302	NA	NA	NA	NA	NA
34.365	4.14833	820.217	NA	NA	NA	NA	NA
34.368	4.14833	821.131	NA	NA	NA	NA	NA
34.367	4.12889	822.046	NA	NA	NA	NA	NA
34.367	4.12889	822.96	NA	NA	NA	NA	NA
34.368	4.12889	823.874	NA	NA	NA	NA	NA
34.371	4.12889	824.789	NA	NA	NA	NA	NA
34.37	4.12167	825.703	NA	NA	NA	NA	NA
34.369	4.11889	826.618	NA	NA	NA	NA	NA
34.365	4.11889	827.532	NA	NA	NA	NA	NA
34.365	4.11333	828.446	NA	NA	NA	NA	NA
34.369	4.10889	829.361	NA	NA	NA	NA	NA
34.368	4.09889	830.275	NA	NA	NA	NA	NA
34.369	4.08889	831.19	NA	NA	NA	NA	NA
34.371	4.06889	832.104	NA	NA	NA	NA	NA
34.372	4.06889	833.018	NA	NA	NA	NA	NA
34.371	4.05889	833.933	NA	NA	NA	NA	NA
34.372	4.05889	834.847	NA	NA	NA	NA	NA
34.37	4.05889	835.762	NA	NA	NA	NA	NA
34.367	4.05889	836.676	NA	NA	NA	NA	NA
34.371	4.05444	837.59	NA	NA	NA	NA	NA
34.374	4.04889	838.505	NA	NA	NA	NA	NA
34.373	4.03889	839.419	NA	NA	NA	NA	NA
34.375	4.02889	840.334	NA	NA	NA	NA	NA
34.375	4.02889	841.248	NA	NA	NA	NA	NA
34.375	4.02889	842.162	NA	NA	NA	NA	NA
34.376	3.99944	843.077	NA	NA	NA	NA	NA
34.376	3.98944	843.991	NA	NA	NA	NA	NA
34.377	3.98944	844.906	NA	NA	NA	NA	NA
34.379	3.98	845.82	NA	NA	NA	NA	NA
34.381	3.98278	846.734	NA	NA	NA	NA	NA
34.378	3.97944	847.649	NA	NA	NA	NA	NA
34.378	3.97944	848.563	NA	NA	NA	NA	NA
34.378	3.96944	849.478	NA	NA	NA	NA	NA
34.378	3.96944	850.392	NA	NA	NA	NA	NA
34.38	3.96222	851.306	NA	NA	NA	NA	NA
34.38	3.95611	852.221	NA	NA	NA	NA	NA
34.382	3.94	853.135	NA	NA	NA	NA	NA
34.383	3.93389	854.05	NA	NA	NA	NA	NA
34.38	3.92944	854.964	NA	NA	NA	NA	NA
34.38	3.92944	855.878	NA	NA	NA	NA	NA
34.379	3.92944	856.793	NA	NA	NA	NA	NA
34.379	3.92944	857.707	NA	NA	NA	NA	NA
34.379	3.92944	858.622	NA	NA	NA	NA	NA
34.381	3.92667	859.536	NA	NA	NA	NA	NA
34.381	3.91944	860.45	NA	NA	NA	NA	NA
34.384	3.89944	861.365	NA	NA	NA	NA	NA
34.386	3.88944	862.279	NA	NA	NA	NA	NA
34.381	3.88944	863.194	NA	NA	NA	NA	NA
34.381	3.88944	864.108	NA	NA	NA	NA	NA
34.386	3.87944	865.022	NA	NA	NA	NA	NA
34.389	3.87944	865.937	NA	NA	NA	NA	NA
34.388	3.87944	866.851	NA	NA	NA	NA	NA
34.388	3.87944	867.766	NA	NA	NA	NA	NA
34.387	3.87944	868.68	NA	NA	NA	NA	NA
34.389	3.87944	869.594	NA	NA	NA	NA	NA
34.394	3.86944	870.509	NA	NA	NA	NA	NA
34.391	3.86944	871.423	NA	NA	NA	NA	NA
34.385	3.86	872.338	NA	NA	NA	NA	NA
34.386	3.85944	873.252	NA	NA	NA	NA	NA
34.386	3.85944	874.166	NA	NA	NA	NA	NA
34.386	3.85944	875.081	NA	NA	NA	NA	NA
34.389	3.85944	875.995	NA	NA	NA	NA	NA
34.389	3.84944	876.91	NA	NA	NA	NA	NA
34.388	3.84278	877.824	NA	NA	NA	NA	NA
34.389	3.83944	878.738	NA	NA	NA	NA	NA
34.388	3.83944	879.653	NA	NA	NA	NA	NA
34.389	3.83389	880.567	NA	NA	NA	NA	NA
34.391	3.83944	881.482	NA	NA	NA	NA	NA
34.393	3.82944	882.396	NA	NA	NA	NA	NA
34.392	3.82944	883.31	NA	NA	NA	NA	NA
34.392	3.82944	884.225	NA	NA	NA	NA	NA
34.39	3.82222	885.139	NA	NA	NA	NA	NA
34.391	3.81611	886.054	NA	NA	NA	NA	NA
34.394	3.80944	886.968	NA	NA	NA	NA	NA
34.395	3.76333	887.882	NA	NA	NA	NA	NA
34.398	3.73	888.797	NA	NA	NA	NA	NA
34.398	3.73	889.711	NA	NA	NA	NA	NA
34.401	3.72	890.626	NA	NA	NA	NA	NA
34.404	3.72	891.54	NA	NA	NA	NA	NA
34.401	3.72	892.454	NA	NA	NA	NA	NA
34.398	3.72	893.369	NA	NA	NA	NA	NA
34.396	3.72	894.283	NA	NA	NA	NA	NA
34.397	3.72	895.198	NA	NA	NA	NA	NA
34.396	3.72	896.112	NA	NA	NA	NA	NA
34.394	3.72	897.026	NA	NA	NA	NA	NA
34.397	3.72	897.941	NA	NA	NA	NA	NA
34.4	3.71722	898.855	NA	NA	NA	NA	NA
34.402	3.71	899.77	NA	NA	NA	NA	NA
34.402	3.71	900.684	NA	NA	NA	NA	NA
34.401	3.7	901.598	NA	NA	NA	NA	NA
34.399	3.7	902.513	NA	NA	NA	NA	NA
34.402	3.69	903.427	NA	NA	NA	NA	NA
34.405	3.68889	904.342	NA	NA	NA	NA	NA
34.405	3.68	905.256	NA	NA	NA	NA	NA
34.4	3.68	906.17	NA	NA	NA	NA	NA
34.398	3.67944	907.085	NA	NA	NA	NA	NA
34.402	3.67667	907.999	NA	NA	NA	NA	NA
34.405	3.66	908.914	NA	NA	NA	NA	NA
34.402	3.66	909.828	NA	NA	NA	NA	NA
34.401	3.66	910.742	NA	NA	NA	NA	NA
34.406	3.65	911.657	NA	NA	NA	NA	NA
34.407	3.64	912.571	NA	NA	NA	NA	NA
34.402	3.64	913.486	NA	NA	NA	NA	NA
34.402	3.64	914.4	NA	NA	NA	NA	NA
34.404	3.63	915.314	NA	NA	NA	NA	NA
34.404	3.63	916.229	NA	NA	NA	NA	NA
34.404	3.63	917.143	NA	NA	NA	NA	NA
34.404	3.63	918.058	NA	NA	NA	NA	NA
34.405	3.63	918.972	NA	NA	NA	NA	NA
34.407	3.63	919.886	NA	NA	NA	NA	NA
34.408	3.62	920.801	NA	NA	NA	NA	NA
34.408	3.62333	921.715	NA	NA	NA	NA	NA
34.406	3.62	922.63	NA	NA	NA	NA	NA
34.405	3.63	923.544	NA	NA	NA	NA	NA
34.404	3.62333	924.458	NA	NA	NA	NA	NA
34.404	3.62	925.373	NA	NA	NA	NA	NA
34.405	3.62333	926.287	NA	NA	NA	NA	NA
34.407	3.62	927.202	NA	NA	NA	NA	NA
34.409	3.62	928.116	NA	NA	NA	NA	NA
34.413	3.62	929.03	NA	NA	NA	NA	NA
34.41	3.61	929.945	NA	NA	NA	NA	NA
34.403	3.61	930.859	NA	NA	NA	NA	NA
34.404	3.61	931.774	NA	NA	NA	NA	NA
34.406	3.60167	932.688	NA	NA	NA	NA	NA
34.407	3.6	933.602	NA	NA	NA	NA	NA
34.407	3.6	934.517	NA	NA	NA	NA	NA
34.407	3.6	935.431	NA	NA	NA	NA	NA
34.406	3.6	936.346	NA	NA	NA	NA	NA
34.406	3.6	937.26	NA	NA	NA	NA	NA
34.407	3.6	938.174	NA	NA	NA	NA	NA
34.406	3.6	939.089	NA	NA	NA	NA	NA
34.404	3.6	940.003	NA	NA	NA	NA	NA
34.407	3.6	940.918	NA	NA	NA	NA	NA
34.412	3.59167	941.832	NA	NA	NA	NA	NA
34.414	3.59	942.746	NA	NA	NA	NA	NA
34.412	3.58111	943.661	NA	NA	NA	NA	NA
34.409	3.58	944.575	NA	NA	NA	NA	NA
34.407	3.58	945.49	NA	NA	NA	NA	NA
34.408	3.58	946.404	NA	NA	NA	NA	NA
34.409	3.58	947.318	NA	NA	NA	NA	NA
34.407	3.58	948.233	NA	NA	NA	NA	NA
34.407	3.57056	949.147	NA	NA	NA	NA	NA
34.407	3.57222	950.062	NA	NA	NA	NA	NA
34.407	3.58	950.976	NA	NA	NA	NA	NA
34.406	3.57056	951.89	NA	NA	NA	NA	NA
34.406	3.57222	952.805	NA	NA	NA	NA	NA
34.406	3.57389	953.719	NA	NA	NA	NA	NA
34.406	3.57056	954.634	NA	NA	NA	NA	NA
34.405	3.57	955.548	NA	NA	NA	NA	NA
34.407	3.57556	956.462	NA	NA	NA	NA	NA
34.413	3.57	957.377	NA	NA	NA	NA	NA
34.411	3.57	958.291	NA	NA	NA	NA	NA
34.411	3.57556	959.206	NA	NA	NA	NA	NA
34.418	3.57	960.12	NA	NA	NA	NA	NA
34.416	3.57	961.034	NA	NA	NA	NA	NA
34.411	3.57	961.949	NA	NA	NA	NA	NA
34.412	3.57	962.863	NA	NA	NA	NA	NA
34.411	3.57	963.778	NA	NA	NA	NA	NA
34.408	3.57	964.692	NA	NA	NA	NA	NA
34.406	3.57	965.606	NA	NA	NA	NA	NA
34.406	3.57	966.521	NA	NA	NA	NA	NA
34.409	3.565	967.435	NA	NA	NA	NA	NA
34.415	3.55	968.35	NA	NA	NA	NA	NA
34.421	3.55	969.264	NA	NA	NA	NA	NA
34.423	3.55	970.178	NA	NA	NA	NA	NA
34.421	3.55	971.093	NA	NA	NA	NA	NA
34.418	3.55	972.007	NA	NA	NA	NA	NA
34.412	3.55	972.922	NA	NA	NA	NA	NA
34.412	3.54222	973.836	NA	NA	NA	NA	NA
34.414	3.53944	974.75	NA	NA	NA	NA	NA
34.413	3.54389	975.665	NA	NA	NA	NA	NA
34.412	3.53944	976.579	NA	NA	NA	NA	NA
34.413	3.53944	977.494	NA	NA	NA	NA	NA
34.413	3.53944	978.408	NA	NA	NA	NA	NA
34.412	3.53944	979.322	NA	NA	NA	NA	NA
34.413	3.53	980.237	NA	NA	NA	NA	NA
34.413	3.53944	981.151	NA	NA	NA	NA	NA
34.415	3.53333	982.066	NA	NA	NA	NA	NA
34.416	3.53	982.98	NA	NA	NA	NA	NA
34.418	3.52944	983.894	NA	NA	NA	NA	NA
34.419	3.52944	984.809	NA	NA	NA	NA	NA
34.42	3.52944	985.723	NA	NA	NA	NA	NA
34.422	3.52944	986.638	NA	NA	NA	NA	NA
34.424	3.51944	987.552	NA	NA	NA	NA	NA
34.427	3.51944	988.466	NA	NA	NA	NA	NA
34.427	3.51944	989.381	NA	NA	NA	NA	NA
34.426	3.51944	990.295	NA	NA	NA	NA	NA
34.426	3.51944	991.21	NA	NA	NA	NA	NA
34.424	3.51944	992.124	NA	NA	NA	NA	NA
34.42	3.51944	993.038	NA	NA	NA	NA	NA
34.416	3.50944	993.953	NA	NA	NA	NA	NA
34.418	3.50944	994.867	NA	NA	NA	NA	NA
34.423	3.49944	995.782	NA	NA	NA	NA	NA
34.424	3.49944	996.696	NA	NA	NA	NA	NA
34.423	3.49944	997.61	NA	NA	NA	NA	NA
34.422	3.49944	998.525	NA	NA	NA	NA	NA
34.422	3.49944	999.439	NA	NA	NA	NA	NA
34.423	3.49944	1000.35	NA	NA	NA	NA	NA
34.424	3.49944	1001.27	NA	NA	NA	NA	NA
34.425	3.49444	1002.18	NA	NA	NA	NA	NA
34.424	3.49778	1003.1	NA	NA	NA	NA	NA
34.424	3.49833	1004.01	NA	NA	NA	NA	NA
34.423	3.49556	1004.93	NA	NA	NA	NA	NA
34.426	3.48944	1005.84	NA	NA	NA	NA	NA
34.429	3.48944	1006.75	NA	NA	NA	NA	NA
34.424	3.48944	1007.67	NA	NA	NA	NA	NA
34.421	3.47944	1008.58	NA	NA	NA	NA	NA
34.424	3.47889	1009.5	NA	NA	NA	NA	NA
34.423	3.46944	1010.41	NA	NA	NA	NA	NA
34.424	3.465	1011.33	NA	NA	NA	NA	NA
34.423	3.46944	1012.24	NA	NA	NA	NA	NA
34.419	3.46944	1013.16	NA	NA	NA	NA	NA
34.418	3.46944	1014.07	NA	NA	NA	NA	NA
34.417	3.46722	1014.98	NA	NA	NA	NA	NA
34.418	3.46889	1015.9	NA	NA	NA	NA	NA
34.419	3.45944	1016.81	NA	NA	NA	NA	NA
34.419	3.45944	1017.73	NA	NA	NA	NA	NA
34.423	3.45944	1018.64	NA	NA	NA	NA	NA
34.429	3.44944	1019.56	NA	NA	NA	NA	NA
34.429	3.44944	1020.47	NA	NA	NA	NA	NA
34.429	3.44944	1021.38	NA	NA	NA	NA	NA
34.429	3.44944	1022.3	NA	NA	NA	NA	NA
34.428	3.43944	1023.21	NA	NA	NA	NA	NA
34.424	3.43944	1024.13	NA	NA	NA	NA	NA
34.428	3.42944	1025.04	NA	NA	NA	NA	NA
34.427	3.41944	1025.96	NA	NA	NA	NA	NA
34.423	3.41944	1026.87	NA	NA	NA	NA	NA
34.425	3.41944	1027.79	NA	NA	NA	NA	NA
34.427	3.41944	1028.7	NA	NA	NA	NA	NA
34.43	3.41944	1029.61	NA	NA	NA	NA	NA
34.431	3.41944	1030.53	NA	NA	NA	NA	NA
34.432	3.41	1031.44	NA	NA	NA	NA	NA
34.438	3.39944	1032.36	NA	NA	NA	NA	NA
34.439	3.39944	1033.27	NA	NA	NA	NA	NA
34.434	3.39944	1034.19	NA	NA	NA	NA	NA
34.43	3.39944	1035.1	NA	NA	NA	NA	NA
34.431	3.39944	1036.02	NA	NA	NA	NA	NA
34.43	3.39944	1036.93	NA	NA	NA	NA	NA
34.43	3.39944	1037.84	NA	NA	NA	NA	NA
34.432	3.39556	1038.76	NA	NA	NA	NA	NA
34.429	3.38944	1039.67	NA	NA	NA	NA	NA
34.432	3.38889	1040.59	NA	NA	NA	NA	NA
34.435	3.38722	1041.5	NA	NA	NA	NA	NA
34.436	3.37944	1042.42	NA	NA	NA	NA	NA
34.436	3.37944	1043.33	NA	NA	NA	NA	NA
34.435	3.37944	1044.24	NA	NA	NA	NA	NA
34.435	3.37944	1045.16	NA	NA	NA	NA	NA
34.434	3.37944	1046.07	NA	NA	NA	NA	NA
34.434	3.37944	1046.99	NA	NA	NA	NA	NA
34.434	3.37944	1047.9	NA	NA	NA	NA	NA
34.435	3.37944	1048.82	NA	NA	NA	NA	NA
34.438	3.37722	1049.73	NA	NA	NA	NA	NA
34.434	3.36944	1050.65	NA	NA	NA	NA	NA
34.428	3.36278	1051.56	NA	NA	NA	NA	NA
34.428	3.36944	1052.47	NA	NA	NA	NA	NA
34.434	3.36944	1053.39	NA	NA	NA	NA	NA
34.439	3.35889	1054.3	NA	NA	NA	NA	NA
34.436	3.35889	1055.22	NA	NA	NA	NA	NA
34.432	3.35889	1056.13	NA	NA	NA	NA	NA
34.433	3.35889	1057.05	NA	NA	NA	NA	NA
34.433	3.35889	1057.96	NA	NA	NA	NA	NA
34.431	3.35889	1058.88	NA	NA	NA	NA	NA
34.43	3.35889	1059.79	NA	NA	NA	NA	NA
34.432	3.35889	1060.7	NA	NA	NA	NA	NA
34.436	3.35889	1061.62	NA	NA	NA	NA	NA
34.439	3.34889	1062.53	NA	NA	NA	NA	NA
34.438	3.34889	1063.45	NA	NA	NA	NA	NA
34.437	3.34889	1064.36	NA	NA	NA	NA	NA
34.438	3.34444	1065.28	NA	NA	NA	NA	NA
34.433	3.33889	1066.19	NA	NA	NA	NA	NA
34.432	3.33889	1067.1	NA	NA	NA	NA	NA
34.433	3.33889	1068.02	NA	NA	NA	NA	NA
34.431	3.33889	1068.93	NA	NA	NA	NA	NA
34.429	3.33889	1069.85	NA	NA	NA	NA	NA
34.428	3.33778	1070.76	NA	NA	NA	NA	NA
34.428	3.33889	1071.68	NA	NA	NA	NA	NA
34.428	3.33556	1072.59	NA	NA	NA	NA	NA
34.428	3.33889	1073.51	NA	NA	NA	NA	NA
34.43	3.32889	1074.42	NA	NA	NA	NA	NA
34.433	3.33333	1075.33	NA	NA	NA	NA	NA
34.434	3.32889	1076.25	NA	NA	NA	NA	NA
34.434	3.32889	1077.16	NA	NA	NA	NA	NA
34.437	3.32889	1078.08	NA	NA	NA	NA	NA
34.441	3.31889	1078.99	NA	NA	NA	NA	NA
34.44	3.31889	1079.91	NA	NA	NA	NA	NA
34.438	3.31889	1080.82	NA	NA	NA	NA	NA
34.437	3.31889	1081.74	NA	NA	NA	NA	NA
34.438	3.30889	1082.65	NA	NA	NA	NA	NA
34.438	3.30889	1083.56	NA	NA	NA	NA	NA
34.438	3.29889	1084.48	NA	NA	NA	NA	NA
34.441	3.28889	1085.39	NA	NA	NA	NA	NA
34.44	3.28889	1086.31	NA	NA	NA	NA	NA
34.44	3.28889	1087.22	NA	NA	NA	NA	NA
34.439	3.28889	1088.14	NA	NA	NA	NA	NA
34.436	3.28889	1089.05	NA	NA	NA	NA	NA
34.435	3.28889	1089.96	NA	NA	NA	NA	NA
34.436	3.28778	1090.88	NA	NA	NA	NA	NA
34.439	3.28722	1091.79	NA	NA	NA	NA	NA
34.443	3.27889	1092.71	NA	NA	NA	NA	NA
34.443	3.27889	1093.62	NA	NA	NA	NA	NA
34.44	3.27889	1094.54	NA	NA	NA	NA	NA
34.442	3.27889	1095.45	NA	NA	NA	NA	NA
34.446	3.27333	1096.37	NA	NA	NA	NA	NA
34.446	3.26889	1097.28	NA	NA	NA	NA	NA
34.445	3.26889	1098.19	NA	NA	NA	NA	NA
34.445	3.26889	1099.11	NA	NA	NA	NA	NA
34.446	3.26333	1100.02	NA	NA	NA	NA	NA
34.444	3.25889	1100.94	NA	NA	NA	NA	NA
34.441	3.25889	1101.85	NA	NA	NA	NA	NA
34.442	3.24889	1102.77	NA	NA	NA	NA	NA
34.439	3.24889	1103.68	NA	NA	NA	NA	NA
34.441	3.23833	1104.6	NA	NA	NA	NA	NA
34.446	3.23833	1105.51	NA	NA	NA	NA	NA
34.446	3.23833	1106.42	NA	NA	NA	NA	NA
34.442	3.23833	1107.34	NA	NA	NA	NA	NA
34.441	3.23833	1108.25	NA	NA	NA	NA	NA
34.439	3.23833	1109.17	NA	NA	NA	NA	NA
34.438	3.23833	1110.08	NA	NA	NA	NA	NA
34.438	3.23833	1111	NA	NA	NA	NA	NA
34.441	3.23833	1111.91	NA	NA	NA	NA	NA
34.444	3.22833	1112.82	NA	NA	NA	NA	NA
34.445	3.21833	1113.74	NA	NA	NA	NA	NA
34.45	3.20278	1114.65	NA	NA	NA	NA	NA
34.452	3.18833	1115.57	NA	NA	NA	NA	NA
34.453	3.18833	1116.48	NA	NA	NA	NA	NA
34.456	3.18	1117.4	NA	NA	NA	NA	NA
34.456	3.18278	1118.31	NA	NA	NA	NA	NA
34.458	3.17833	1119.23	NA	NA	NA	NA	NA
34.46	3.17833	1120.14	NA	NA	NA	NA	NA
34.46	3.17833	1121.05	NA	NA	NA	NA	NA
34.459	3.17833	1121.97	NA	NA	NA	NA	NA
34.459	3.17833	1122.88	NA	NA	NA	NA	NA
34.457	3.17833	1123.8	NA	NA	NA	NA	NA
34.456	3.17833	1124.71	NA	NA	NA	NA	NA
34.457	3.17833	1125.63	NA	NA	NA	NA	NA
34.458	3.17833	1126.54	NA	NA	NA	NA	NA
34.459	3.17667	1127.46	NA	NA	NA	NA	NA
34.458	3.16833	1128.37	NA	NA	NA	NA	NA
34.452	3.16833	1129.28	NA	NA	NA	NA	NA
34.448	3.16833	1130.2	NA	NA	NA	NA	NA
34.448	3.16833	1131.11	NA	NA	NA	NA	NA
34.449	3.16778	1132.03	NA	NA	NA	NA	NA
34.449	3.16056	1132.94	NA	NA	NA	NA	NA
34.45	3.16278	1133.86	NA	NA	NA	NA	NA
34.45	3.16833	1134.77	NA	NA	NA	NA	NA
34.451	3.15833	1135.68	NA	NA	NA	NA	NA
34.453	3.15833	1136.6	NA	NA	NA	NA	NA
34.453	3.15833	1137.51	NA	NA	NA	NA	NA
34.452	3.15833	1138.43	NA	NA	NA	NA	NA
34.452	3.15833	1139.34	NA	NA	NA	NA	NA
34.452	3.15833	1140.26	NA	NA	NA	NA	NA
34.454	3.15833	1141.17	NA	NA	NA	NA	NA
34.455	3.15833	1142.09	NA	NA	NA	NA	NA
34.452	3.15833	1143	NA	NA	NA	NA	NA
34.45	3.15833	1143.91	NA	NA	NA	NA	NA
34.449	3.15833	1144.83	NA	NA	NA	NA	NA
34.449	3.15833	1145.74	NA	NA	NA	NA	NA
34.448	3.15833	1146.66	NA	NA	NA	NA	NA
34.448	3.15833	1147.57	NA	NA	NA	NA	NA
34.447	3.15833	1148.49	NA	NA	NA	NA	NA
34.447	3.15833	1149.4	NA	NA	NA	NA	NA
34.448	3.15833	1150.32	NA	NA	NA	NA	NA
34.449	3.15833	1151.23	NA	NA	NA	NA	NA
34.453	3.14889	1152.14	NA	NA	NA	NA	NA
34.455	3.14778	1153.06	NA	NA	NA	NA	NA
34.455	3.14778	1153.97	NA	NA	NA	NA	NA
34.457	3.14056	1154.89	NA	NA	NA	NA	NA
34.457	3.14778	1155.8	NA	NA	NA	NA	NA
34.458	3.14611	1156.72	NA	NA	NA	NA	NA
34.461	3.13778	1157.63	NA	NA	NA	NA	NA
34.461	3.13778	1158.54	NA	NA	NA	NA	NA
34.46	3.13778	1159.46	NA	NA	NA	NA	NA
34.461	3.13778	1160.37	NA	NA	NA	NA	NA
34.462	3.13778	1161.29	NA	NA	NA	NA	NA
34.461	3.13778	1162.2	NA	NA	NA	NA	NA
34.459	3.13778	1163.12	NA	NA	NA	NA	NA
34.46	3.13778	1164.03	NA	NA	NA	NA	NA
34.459	3.13778	1164.95	NA	NA	NA	NA	NA
34.459	3.13778	1165.86	NA	NA	NA	NA	NA
34.457	3.12778	1166.77	NA	NA	NA	NA	NA
34.452	3.12778	1167.69	NA	NA	NA	NA	NA
34.456	3.12778	1168.6	NA	NA	NA	NA	NA
34.461	3.11778	1169.52	NA	NA	NA	NA	NA
34.461	3.11333	1170.43	NA	NA	NA	NA	NA
34.46	3.11778	1171.35	NA	NA	NA	NA	NA
34.462	3.11667	1172.26	NA	NA	NA	NA	NA
34.463	3.09778	1173.18	NA	NA	NA	NA	NA
34.465	3.09056	1174.09	NA	NA	NA	NA	NA
34.464	3.08778	1175	NA	NA	NA	NA	NA
34.458	3.08778	1175.92	NA	NA	NA	NA	NA
34.456	3.07833	1176.83	NA	NA	NA	NA	NA
34.46	3.07722	1177.75	NA	NA	NA	NA	NA
34.462	3.07722	1178.66	NA	NA	NA	NA	NA
34.461	3.07722	1179.58	NA	NA	NA	NA	NA
34.461	3.07722	1180.49	NA	NA	NA	NA	NA
34.46	3.07722	1181.4	NA	NA	NA	NA	NA
34.46	3.07722	1182.32	NA	NA	NA	NA	NA
34.459	3.07722	1183.23	NA	NA	NA	NA	NA
34.461	3.07722	1184.15	NA	NA	NA	NA	NA
34.46	3.07722	1185.06	NA	NA	NA	NA	NA
34.458	3.07722	1185.98	NA	NA	NA	NA	NA
34.457	3.07722	1186.89	NA	NA	NA	NA	NA
34.459	3.07167	1187.81	NA	NA	NA	NA	NA
34.459	3.07722	1188.72	NA	NA	NA	NA	NA
34.458	3.06889	1189.63	NA	NA	NA	NA	NA
34.459	3.06778	1190.55	NA	NA	NA	NA	NA
34.463	3.06722	1191.46	NA	NA	NA	NA	NA
34.47	3.03167	1192.38	NA	NA	NA	NA	NA
34.47	2.99667	1193.29	NA	NA	NA	NA	NA
34.468	2.99667	1194.21	NA	NA	NA	NA	NA
34.473	2.98667	1195.12	NA	NA	NA	NA	NA
34.474	2.97667	1196.04	NA	NA	NA	NA	NA
34.475	2.97667	1196.95	NA	NA	NA	NA	NA
34.479	2.97667	1197.86	NA	NA	NA	NA	NA
34.482	2.97667	1198.78	NA	NA	NA	NA	NA
34.481	2.97667	1199.69	NA	NA	NA	NA	NA
34.482	2.97889	1200.61	NA	NA	NA	NA	NA
34.48	2.97667	1201.52	NA	NA	NA	NA	NA
34.48	2.97667	1202.44	NA	NA	NA	NA	NA
34.476	2.97667	1203.35	NA	NA	NA	NA	NA
34.469	2.97667	1204.26	NA	NA	NA	NA	NA
34.473	2.97444	1205.18	NA	NA	NA	NA	NA
34.473	2.96667	1206.09	NA	NA	NA	NA	NA
34.47	2.96667	1207.01	NA	NA	NA	NA	NA
34.473	2.96667	1207.92	NA	NA	NA	NA	NA
34.478	2.95667	1208.84	NA	NA	NA	NA	NA
34.48	2.95667	1209.75	NA	NA	NA	NA	NA
34.478	2.95667	1210.67	NA	NA	NA	NA	NA
34.476	2.95667	1211.58	NA	NA	NA	NA	NA
34.478	2.95667	1212.49	NA	NA	NA	NA	NA
34.479	2.95667	1213.41	NA	NA	NA	NA	NA
34.478	2.95667	1214.32	NA	NA	NA	NA	NA
34.478	2.95667	1215.24	NA	NA	NA	NA	NA
34.477	2.94611	1216.15	NA	NA	NA	NA	NA
34.473	2.94611	1217.07	NA	NA	NA	NA	NA
34.472	2.94611	1217.98	NA	NA	NA	NA	NA
34.475	2.94556	1218.9	NA	NA	NA	NA	NA
34.475	2.93611	1219.81	NA	NA	NA	NA	NA
34.474	2.94611	1220.72	NA	NA	NA	NA	NA
34.475	2.94611	1221.64	NA	NA	NA	NA	NA
34.478	2.94611	1222.55	NA	NA	NA	NA	NA
34.483	2.94611	1223.47	NA	NA	NA	NA	NA
34.478	2.94611	1224.38	NA	NA	NA	NA	NA
34.477	2.94611	1225.3	NA	NA	NA	NA	NA
34.477	2.95111	1226.21	NA	NA	NA	NA	NA
34.473	2.95389	1227.12	NA	NA	NA	NA	NA
34.476	2.94556	1228.04	NA	NA	NA	NA	NA
34.478	2.94611	1228.95	NA	NA	NA	NA	NA
34.478	2.93889	1229.87	NA	NA	NA	NA	NA
34.477	2.93611	1230.78	NA	NA	NA	NA	NA
34.475	2.93611	1231.7	NA	NA	NA	NA	NA
34.473	2.93611	1232.61	NA	NA	NA	NA	NA
34.471	2.93611	1233.53	NA	NA	NA	NA	NA
34.472	2.93611	1234.44	NA	NA	NA	NA	NA
34.471	2.93611	1235.35	NA	NA	NA	NA	NA
34.473	2.93611	1236.27	NA	NA	NA	NA	NA
34.477	2.93611	1237.18	NA	NA	NA	NA	NA
34.477	2.93611	1238.1	NA	NA	NA	NA	NA
34.477	2.92611	1239.01	NA	NA	NA	NA	NA
34.478	2.92611	1239.93	NA	NA	NA	NA	NA
34.475	2.92611	1240.84	NA	NA	NA	NA	NA
34.473	2.93167	1241.76	NA	NA	NA	NA	NA
34.476	2.92611	1242.67	NA	NA	NA	NA	NA
34.477	2.92611	1243.58	NA	NA	NA	NA	NA
34.474	2.93556	1244.5	NA	NA	NA	NA	NA
34.474	2.93389	1245.41	NA	NA	NA	NA	NA
34.477	2.92167	1246.33	NA	NA	NA	NA	NA
34.475	2.92611	1247.24	NA	NA	NA	NA	NA
34.475	2.92611	1248.16	NA	NA	NA	NA	NA
34.477	2.92611	1249.07	NA	NA	NA	NA	NA
34.477	2.92611	1249.98	NA	NA	NA	NA	NA
34.478	2.91889	1250.9	NA	NA	NA	NA	NA
34.481	2.92167	1251.81	NA	NA	NA	NA	NA
34.481	2.91611	1252.73	NA	NA	NA	NA	NA
34.483	2.91611	1253.64	NA	NA	NA	NA	NA
34.481	2.91611	1254.56	NA	NA	NA	NA	NA
34.479	2.925	1255.47	NA	NA	NA	NA	NA
34.482	2.90611	1256.39	NA	NA	NA	NA	NA
34.483	2.90611	1257.3	NA	NA	NA	NA	NA
34.482	2.90611	1258.21	NA	NA	NA	NA	NA
34.481	2.90611	1259.13	NA	NA	NA	NA	NA
34.476	2.90611	1260.04	NA	NA	NA	NA	NA
34.475	2.89667	1260.96	NA	NA	NA	NA	NA
34.477	2.90611	1261.87	NA	NA	NA	NA	NA
34.479	2.89611	1262.79	NA	NA	NA	NA	NA
34.479	2.89611	1263.7	NA	NA	NA	NA	NA
34.481	2.89611	1264.62	NA	NA	NA	NA	NA
34.481	2.89611	1265.53	NA	NA	NA	NA	NA
34.479	2.89611	1266.44	NA	NA	NA	NA	NA
34.481	2.89611	1267.36	NA	NA	NA	NA	NA
34.481	2.89611	1268.27	NA	NA	NA	NA	NA
34.48	2.89611	1269.19	NA	NA	NA	NA	NA
34.485	2.88556	1270.1	NA	NA	NA	NA	NA
34.488	2.87722	1271.02	NA	NA	NA	NA	NA
34.483	2.87556	1271.93	NA	NA	NA	NA	NA
34.479	2.87389	1272.84	NA	NA	NA	NA	NA
34.482	2.87556	1273.76	NA	NA	NA	NA	NA
34.485	2.86556	1274.67	NA	NA	NA	NA	NA
34.486	2.86556	1275.59	NA	NA	NA	NA	NA
34.486	2.86556	1276.5	NA	NA	NA	NA	NA
34.485	2.86556	1277.42	NA	NA	NA	NA	NA
34.485	2.86556	1278.33	NA	NA	NA	NA	NA
34.484	2.86556	1279.25	NA	NA	NA	NA	NA
34.484	2.86556	1280.16	NA	NA	NA	NA	NA
34.484	2.86556	1281.07	NA	NA	NA	NA	NA
34.489	2.86222	1281.99	NA	NA	NA	NA	NA
34.494	2.85556	1282.9	NA	NA	NA	NA	NA
34.488	2.85556	1283.82	NA	NA	NA	NA	NA
34.482	2.85556	1284.73	NA	NA	NA	NA	NA
34.484	2.85556	1285.65	NA	NA	NA	NA	NA
34.484	2.85556	1286.56	NA	NA	NA	NA	NA
34.484	2.85556	1287.48	NA	NA	NA	NA	NA
34.488	2.85556	1288.39	NA	NA	NA	NA	NA
34.489	2.85556	1289.3	NA	NA	NA	NA	NA
34.489	2.85556	1290.22	NA	NA	NA	NA	NA
34.49	2.85556	1291.13	NA	NA	NA	NA	NA
34.489	2.85556	1292.05	NA	NA	NA	NA	NA
34.489	2.85556	1292.96	NA	NA	NA	NA	NA
34.488	2.85556	1293.88	NA	NA	NA	NA	NA
34.488	2.85556	1294.79	NA	NA	NA	NA	NA
34.487	2.85556	1295.7	NA	NA	NA	NA	NA
34.487	2.85556	1296.62	NA	NA	NA	NA	NA
34.486	2.85556	1297.53	NA	NA	NA	NA	NA
34.484	2.85556	1298.45	NA	NA	NA	NA	NA
34.483	2.85556	1299.36	NA	NA	NA	NA	NA
34.483	2.86167	1300.28	NA	NA	NA	NA	NA
34.485	2.85556	1301.19	NA	NA	NA	NA	NA
34.483	2.85556	1302.11	NA	NA	NA	NA	NA
34.486	2.86556	1303.02	NA	NA	NA	NA	NA
34.49	2.86556	1303.93	NA	NA	NA	NA	NA
34.489	2.86556	1304.85	NA	NA	NA	NA	NA
34.489	2.86556	1305.76	NA	NA	NA	NA	NA
34.488	2.86556	1306.68	NA	NA	NA	NA	NA
34.488	2.86556	1307.59	NA	NA	NA	NA	NA
34.487	2.86556	1308.51	NA	NA	NA	NA	NA
34.487	2.86556	1309.42	NA	NA	NA	NA	NA
34.486	2.86556	1310.34	NA	NA	NA	NA	NA
34.486	2.86556	1311.25	NA	NA	NA	NA	NA
34.485	2.86556	1312.16	NA	NA	NA	NA	NA
34.485	2.86556	1313.08	NA	NA	NA	NA	NA
34.484	2.86556	1313.99	NA	NA	NA	NA	NA
34.484	2.86556	1314.91	NA	NA	NA	NA	NA
34.484	2.86556	1315.82	NA	NA	NA	NA	NA
34.483	2.86556	1316.74	NA	NA	NA	NA	NA
34.483	2.86556	1317.65	NA	NA	NA	NA	NA
34.483	2.86556	1318.56	NA	NA	NA	NA	NA
34.486	2.87167	1319.48	NA	NA	NA	NA	NA
34.486	2.87556	1320.39	NA	NA	NA	NA	NA
34.483	2.87556	1321.31	NA	NA	NA	NA	NA
34.48	2.88556	1322.22	NA	NA	NA	NA	NA
34.485	2.85556	1323.14	NA	NA	NA	NA	NA
34.488	2.85556	1324.05	NA	NA	NA	NA	NA
34.488	2.83722	1324.97	NA	NA	NA	NA	NA
34.486	2.85556	1325.88	NA	NA	NA	NA	NA
34.482	2.86556	1326.79	NA	NA	NA	NA	NA
34.481	2.86556	1327.71	NA	NA	NA	NA	NA
34.48	2.85556	1328.62	NA	NA	NA	NA	NA
34.485	2.85333	1329.54	NA	NA	NA	NA	NA
34.488	2.835	1330.45	NA	NA	NA	NA	NA
34.489	2.835	1331.37	NA	NA	NA	NA	NA
34.49	2.835	1332.28	NA	NA	NA	NA	NA
34.489	2.835	1333.2	NA	NA	NA	NA	NA
34.489	2.835	1334.11	NA	NA	NA	NA	NA
34.488	2.835	1335.02	NA	NA	NA	NA	NA
34.488	2.835	1335.94	NA	NA	NA	NA	NA
34.487	2.835	1336.85	NA	NA	NA	NA	NA
34.487	2.835	1337.77	NA	NA	NA	NA	NA
34.488	2.835	1338.68	NA	NA	NA	NA	NA
34.489	2.835	1339.6	NA	NA	NA	NA	NA
34.487	2.835	1340.51	NA	NA	NA	NA	NA
34.485	2.835	1341.42	NA	NA	NA	NA	NA
34.486	2.835	1342.34	NA	NA	NA	NA	NA
34.486	2.835	1343.25	NA	NA	NA	NA	NA
34.488	2.835	1344.17	NA	NA	NA	NA	NA
34.487	2.835	1345.08	NA	NA	NA	NA	NA
34.487	2.835	1346	NA	NA	NA	NA	NA
34.487	2.835	1346.91	NA	NA	NA	NA	NA
34.487	2.84389	1347.83	NA	NA	NA	NA	NA
34.485	2.835	1348.74	NA	NA	NA	NA	NA
34.481	2.835	1349.65	NA	NA	NA	NA	NA
34.484	2.83	1350.57	NA	NA	NA	NA	NA
34.486	2.83111	1351.48	NA	NA	NA	NA	NA
34.486	2.825	1352.4	NA	NA	NA	NA	NA
34.488	2.825	1353.31	NA	NA	NA	NA	NA
34.488	2.82611	1354.23	NA	NA	NA	NA	NA
34.486	2.835	1355.14	NA	NA	NA	NA	NA
34.488	2.825	1356.06	NA	NA	NA	NA	NA
34.488	2.825	1356.97	NA	NA	NA	NA	NA
34.488	2.825	1357.88	NA	NA	NA	NA	NA
34.489	2.825	1358.8	NA	NA	NA	NA	NA
34.489	2.825	1359.71	NA	NA	NA	NA	NA
34.489	2.81833	1360.63	NA	NA	NA	NA	NA
34.489	2.81722	1361.54	NA	NA	NA	NA	NA
34.489	2.82389	1362.46	NA	NA	NA	NA	NA
34.489	2.825	1363.37	NA	NA	NA	NA	NA
34.486	2.82444	1364.28	NA	NA	NA	NA	NA
34.486	2.81667	1365.2	NA	NA	NA	NA	NA
34.49	2.81778	1366.11	NA	NA	NA	NA	NA
34.493	2.815	1367.03	NA	NA	NA	NA	NA
34.493	2.815	1367.94	NA	NA	NA	NA	NA
34.49	2.81944	1368.86	NA	NA	NA	NA	NA
34.49	2.815	1369.77	NA	NA	NA	NA	NA
34.491	2.815	1370.69	NA	NA	NA	NA	NA
34.491	2.815	1371.6	NA	NA	NA	NA	NA
34.492	2.815	1372.51	NA	NA	NA	NA	NA
34.491	2.815	1373.43	NA	NA	NA	NA	NA
34.489	2.815	1374.34	NA	NA	NA	NA	NA
34.489	2.815	1375.26	NA	NA	NA	NA	NA
34.488	2.815	1376.17	NA	NA	NA	NA	NA
34.488	2.815	1377.09	NA	NA	NA	NA	NA
34.487	2.815	1378	NA	NA	NA	NA	NA
34.487	2.815	1378.92	NA	NA	NA	NA	NA
34.486	2.815	1379.83	NA	NA	NA	NA	NA
34.488	2.81333	1380.74	NA	NA	NA	NA	NA
34.488	2.795	1381.66	NA	NA	NA	NA	NA
34.491	2.795	1382.57	NA	NA	NA	NA	NA
34.493	2.80389	1383.49	NA	NA	NA	NA	NA
34.491	2.80667	1384.4	NA	NA	NA	NA	NA
34.492	2.805	1385.32	NA	NA	NA	NA	NA

## Sheet: Sheet2
Date	timeT	timeN	L	B	G	R
2019-10-14 15:27:29	43752.6	0.644086	88.8575	85.43	91.13	85.71
2019-10-14 15:27:29	43752.6	0.644086	89.1046	85.68	91.37	85.97
2019-10-14 15:27:29	43752.6	0.644086	89.0579	85.97	91.3	85.84
2019-10-14 15:27:29	43752.6	0.644086	88.9694	85.74	91.24	85.75
2019-10-14 15:27:29	43752.6	0.644086	89.0941	85.9	91.35	85.89
2019-10-14 15:27:29	43752.6	0.644086	89.0171	85.73	91.15	86.09
2019-10-14 15:27:29	43752.6	0.644086	88.6534	85.35	90.92	85.47
2019-10-14 15:27:29	43752.6	0.644086	89.2074	85.83	91.46	86.08
2019-10-14 15:27:29	43752.6	0.644086	89.4794	86.09	91.72	86.38
2019-10-14 15:27:29	43752.6	0.644086	89.4933	86.37	91.74	86.28
2019-10-14 15:27:29	43752.6	0.644086	88.932	85.85	91.17	85.72
2019-10-14 15:27:29	43752.6	0.644086	88.7747	85.59	91.08	85.47
2019-10-14 15:27:29	43752.6	0.644086	89.3289	86.35	91.53	86.15
2019-10-14 15:27:29	43752.6	0.644086	89.1927	86.09	91.43	85.99
2019-10-14 15:27:29	43752.6	0.644086	89.5482	86.35	91.7	86.55
2019-10-14 15:27:29	43752.6	0.644086	89.4641	86.45	91.69	86.25
2019-10-14 15:27:29	43752.6	0.644086	88.6911	85.42	90.94	85.53
2019-10-14 15:27:29	43752.6	0.644086	89.2024	85.99	91.41	86.1
2019-10-14 15:27:29	43752.6	0.644086	89.4057	86.19	91.58	86.37
2019-10-14 15:27:29	43752.6	0.644086	89.5008	86.27	91.65	86.52
2019-10-14 15:27:29	43752.6	0.644086	89.476	86.45	91.7	86.27
2019-10-14 15:27:29	43752.6	0.644086	89.3425	85.98	91.61	86.18
2019-10-14 15:27:29	43752.6	0.644086	89.2412	86.07	91.43	86.16
2019-10-14 15:27:29	43752.6	0.644086	89.1977	86.23	91.35	86.11
2019-10-14 15:27:29	43752.6	0.644086	89.0378	85.89	91.21	85.98
2019-10-14 15:27:29	43752.6	0.644086	88.972	85.65	91.16	85.95
2019-10-14 15:27:29	43752.6	0.644086	88.7513	85.43	91	85.61
2019-10-14 15:27:29	43752.6	0.644086	88.4083	85.09	90.66	85.26
2019-10-14 15:27:29	43752.6	0.644086	88.9881	85.79	91.15	85.97
2019-10-14 15:27:29	43752.6	0.644086	89.0809	85.96	91.28	85.96
2019-10-14 15:27:29	43752.6	0.644086	88.853	85.67	91.05	85.76
2019-10-14 15:27:29	43752.6	0.644086	88.6264	85.73	90.81	85.45
2019-10-14 15:27:29	43752.6	0.644086	89.2145	86.29	91.26	86.32
2019-10-14 15:27:29	43752.6	0.644086	89.1532	86.35	91.21	86.19
2019-10-14 15:27:29	43752.6	0.644086	89.3872	86.36	91.5	86.4
2019-10-14 15:27:29	43752.6	0.644086	89.3214	86.25	91.45	86.32
2019-10-14 15:27:29	43752.6	0.644086	89.4169	86.28	91.5	86.53
2019-10-14 15:27:29	43752.6	0.644086	90.0282	87.09	92.17	86.95
2019-10-14 15:27:29	43752.6	0.644086	89.4322	86.32	91.61	86.35
2019-10-14 15:27:29	43752.6	0.644086	89.2597	85.93	91.55	86.04
2019-10-14 15:27:29	43752.6	0.644086	89.585	86.42	91.8	86.45
2019-10-14 15:27:29	43752.6	0.644086	89.434	86.31	91.62	86.34
2019-10-14 15:27:29	43752.6	0.644086	89.5869	86.77	91.74	86.44
2019-10-14 15:27:29	43752.6	0.644086	89.5595	86.45	91.72	86.51
2019-10-14 15:27:29	43752.6	0.644086	88.7975	85.31	90.99	85.83
2019-10-14 15:27:29	43752.6	0.644086	88.8364	85.58	91.07	85.7
2019-10-14 15:27:29	43752.6	0.644086	88.7939	85.59	90.97	85.75
2019-10-14 15:27:29	43752.6	0.644086	88.9155	85.65	91.13	85.82
2019-10-14 15:27:29	43752.6	0.644086	89.047	85.79	91.23	86.01
2019-10-14 15:27:29	43752.6	0.644086	89.1906	85.98	91.29	86.3
2019-10-14 15:27:29	43752.6	0.644086	89.0279	85.83	91.21	85.97
2019-10-14 15:27:29	43752.6	0.644086	89.317	86.06	91.5	86.28
2019-10-14 15:27:29	43752.6	0.644086	89.0835	85.98	91.25	86.02
2019-10-14 15:27:29	43752.6	0.644086	88.9285	85.66	91.14	85.84
2019-10-14 15:27:29	43752.6	0.644086	89.177	85.9	91.42	86.03
2019-10-14 15:27:29	43752.6	0.644086	89.2626	85.95	91.5	86.14
2019-10-14 15:27:29	43752.6	0.644086	89.5666	86.42	91.84	86.31
2019-10-14 15:27:29	43752.6	0.644086	89.6766	86.5	91.91	86.51
2019-10-14 15:27:29	43752.6	0.644086	89.7329	86.47	91.92	86.69
2019-10-14 15:27:29	43752.6	0.644086	89.027	85.73	91.34	85.75
2019-10-14 15:27:29	43752.6	0.644086	88.9902	85.79	91.23	85.82
2019-10-14 15:27:29	43752.6	0.644086	88.8962	85.77	91.15	85.67
2019-10-14 15:27:29	43752.6	0.644086	89.0853	85.82	91.32	85.95
2019-10-14 15:27:29	43752.6	0.644086	89.1717	85.96	91.44	85.95
2019-10-14 15:27:29	43752.6	0.644086	89.4683	86.3	91.65	86.4
2019-10-14 15:27:29	43752.6	0.644086	89.2345	86.04	91.46	86.09
2019-10-14 15:27:29	43752.6	0.644086	89.2113	85.99	91.42	86.11
2019-10-14 15:27:29	43752.6	0.644086	89.4633	86.31	91.67	86.34
2019-10-14 15:27:29	43752.6	0.644086	89.2658	86.13	91.45	86.18
2019-10-14 15:27:29	43752.6	0.644086	89.1622	85.95	91.39	86.02
2019-10-14 15:27:29	43752.6	0.644086	89.1358	85.95	91.34	86.03
2019-10-14 15:27:29	43752.6	0.644086	89.2453	86.23	91.37	86.23
2019-10-14 15:27:29	43752.6	0.644086	89.1474	85.97	91.31	86.12
2019-10-14 15:27:29	43752.6	0.644086	89.257	86.28	91.37	86.25
2019-10-14 15:27:29	43752.6	0.644086	89.3217	86.33	91.44	86.31
2019-10-14 15:27:29	43752.6	0.644086	89.1322	86.17	91.24	86.13
2019-10-14 15:27:29	43752.6	0.644086	89.0006	85.77	91.17	85.98
2019-10-14 15:27:29	43752.6	0.644086	89.632	86.7	91.8	86.5
2019-10-14 15:27:29	43752.6	0.644086	89.5571	86.48	91.7	86.53
2019-10-14 15:27:29	43752.6	0.644086	89.8252	86.73	91.94	86.86
2019-10-14 15:27:29	43752.6	0.644086	89.1754	85.98	91.32	86.19
2019-10-14 15:27:29	43752.6	0.644086	89.0836	86.08	91.19	86.1
2019-10-14 15:27:29	43752.6	0.644086	89.0672	86.3	91.17	86
2019-10-14 15:27:29	43752.6	0.644086	88.9472	86	91.08	85.89
2019-10-14 15:27:29	43752.6	0.644086	88.8608	85.76	91	85.85
2019-10-14 15:27:29	43752.6	0.644086	89.2298	86.22	91.31	86.3
2019-10-14 15:27:29	43752.6	0.644086	89.2346	86.29	91.33	86.25
2019-10-14 15:27:29	43752.6	0.644086	89.0835	86	91.19	86.13
2019-10-14 15:27:29	43752.6	0.644086	88.9514	85.95	90.99	86.1
2019-10-14 15:27:29	43752.6	0.644086	89.2871	86.3	91.29	86.5
2019-10-14 15:27:29	43752.6	0.644086	89.6088	86.38	91.67	86.8
2019-10-14 15:27:29	43752.6	0.644086	89.2789	85.91	91.5	86.21
2019-10-14 15:27:29	43752.6	0.644086	88.9544	85.86	91.14	85.85
2019-10-14 15:27:29	43752.6	0.644086	89.0759	86.05	91.31	85.85
2019-10-14 15:27:29	43752.6	0.644086	89.0787	85.74	91.36	85.88
2019-10-14 15:27:29	43752.6	0.644086	89.0586	85.72	91.35	85.84
2019-10-14 15:27:29	43752.6	0.644086	88.9035	85.62	91.1	85.85
2019-10-14 15:27:29	43752.6	0.644086	88.8008	85.58	91.05	85.62
2019-10-14 15:27:29	43752.6	0.644086	88.6471	85.42	90.86	85.54
2019-10-14 15:27:29	43752.6	0.644086	88.6606	85.57	90.92	85.41
2019-10-14 15:27:29	43752.6	0.644086	89.3095	86.31	91.52	86.12
2019-10-14 15:27:29	43752.6	0.644086	89.2505	86.04	91.36	86.34
2019-10-14 15:27:29	43752.6	0.644086	89.1145	85.86	91.26	86.15
2019-10-14 15:27:29	43752.6	0.644086	88.8549	85.68	90.98	85.9
2019-10-14 15:27:29	43752.6	0.644086	89.7902	86.5	91.91	86.89
2019-10-14 15:27:29	43752.6	0.644086	89.4857	86.48	91.67	86.35
2019-10-14 15:27:29	43752.6	0.644086	89.3585	86.22	91.57	86.22
2019-10-14 15:27:29	43752.6	0.644086	89.3423	86.33	91.47	86.32
2019-10-14 15:27:29	43752.6	0.644086	88.747	85.72	90.88	85.72
2019-10-14 15:27:29	43752.6	0.644086	88.9312	85.86	91.08	85.89
2019-10-14 15:27:29	43752.6	0.644086	89.7045	86.84	91.83	86.63
2019-10-14 15:27:29	43752.6	0.644086	89.3644	86.32	91.53	86.28
2019-10-14 15:27:29	43752.6	0.644086	89.2642	86.04	91.47	86.17
2019-10-14 15:27:29	43752.6	0.644086	89.3459	86.18	91.48	86.37
2019-10-14 15:27:29	43752.6	0.644086	89.5551	86.49	91.72	86.48
2019-10-14 15:27:29	43752.6	0.644086	89.7389	86.47	91.92	86.71
2019-10-14 15:27:29	43752.6	0.644086	89.8458	86.71	92.03	86.76
2019-10-14 15:27:29	43752.6	0.644086	89.7359	86.52	91.89	86.74
2019-10-14 15:27:29	43752.6	0.644086	89.6692	86.55	91.75	86.78
2019-10-14 15:27:29	43752.6	0.644086	89.8275	86.72	91.9	86.95
2019-10-14 15:27:29	43752.6	0.644086	90.0577	86.93	92.17	87.11
2019-10-14 15:27:29	43752.6	0.644086	89.7028	86.65	91.91	86.54
2019-10-14 15:27:29	43752.6	0.644086	88.6165	85.1	90.86	85.56
2019-10-14 15:27:29	43752.6	0.644086	88.9087	85.46	91.13	85.87
2019-10-14 15:27:29	43752.6	0.644086	88.9621	85.9	91.13	85.88
2019-10-14 15:27:29	43752.6	0.644086	88.5105	85.39	90.74	85.33
2019-10-14 15:27:29	43752.6	0.644086	88.6998	85.85	90.82	85.63
2019-10-14 15:27:29	43752.6	0.644086	89.1426	86.16	91.28	86.09
2019-10-14 15:27:29	43752.6	0.644086	88.3777	84.87	90.61	85.34
2019-10-14 15:27:29	43752.6	0.644086	88.3798	85.05	90.66	85.18
2019-10-14 15:27:29	43752.6	0.644086	88.2651	85	90.52	85.09
2019-10-14 15:27:29	43752.6	0.644086	88.2661	85.29	90.46	85.1
2019-10-14 15:27:29	43752.6	0.644086	88.81	85.71	91.02	85.66
2019-10-14 15:27:29	43752.6	0.644086	89.0115	85.76	91.16	86.04
2019-10-14 15:27:29	43752.6	0.644086	89.1408	85.97	91.37	85.98
2019-10-14 15:27:29	43752.6	0.644086	89.3281	86.18	91.47	86.33
2019-10-14 15:27:29	43752.6	0.644086	89.4664	86.29	91.72	86.26
2019-10-14 15:27:29	43752.6	0.644086	88.7896	85.41	91.11	85.53
2019-10-14 15:27:29	43752.6	0.644086	88.6659	85.23	90.98	85.44
2019-10-14 15:27:29	43752.6	0.644086	88.7005	85.19	90.95	85.63
2019-10-14 15:27:29	43752.6	0.644086	88.7991	85.33	91.05	85.71
2019-10-14 15:27:29	43752.6	0.644086	88.7708	85.36	90.95	85.8
2019-10-14 15:27:29	43752.6	0.644086	89.0227	85.94	91.2	85.93
2019-10-14 15:27:29	43752.6	0.644086	88.9492	85.83	91.03	86.06
2019-10-14 15:27:29	43752.6	0.644086	88.9598	85.9	91.07	85.99
2019-10-14 15:27:29	43752.6	0.644086	88.654	85.66	90.83	85.53
2019-10-14 15:27:29	43752.6	0.644086	89.2511	86.25	91.32	86.34
2019-10-14 15:27:29	43752.6	0.644086	89.1161	85.98	91.27	86.09
2019-10-14 15:27:29	43752.6	0.644086	89.3912	86.52	91.45	86.45
2019-10-14 15:27:29	43752.6	0.644086	89.0421	85.9	91.19	86.03
2019-10-14 15:27:29	43752.6	0.644086	88.8608	85.69	91.09	85.7
2019-10-14 15:27:29	43752.6	0.644086	89.5329	86.37	91.67	86.55
2019-10-14 15:27:29	43752.6	0.644086	89.7972	86.64	91.92	86.84
2019-10-14 15:27:29	43752.6	0.644086	89.8696	86.89	92.01	86.81
2019-10-14 15:27:29	43752.6	0.644086	89.3784	86.47	91.54	86.25
2019-10-14 15:27:29	43752.6	0.644086	88.8434	85.51	91.07	85.75
2019-10-14 15:27:29	43752.6	0.644086	88.8716	85.45	91.14	85.73
2019-10-14 15:27:29	43752.6	0.644086	88.4498	85.04	90.72	85.3
2019-10-14 15:27:29	43752.6	0.644086	88.9398	85.84	91.17	85.75
2019-10-14 15:27:29	43752.6	0.644086	89.0336	85.91	91.25	85.88
2019-10-14 15:27:29	43752.6	0.644086	88.9807	85.83	91.15	85.93
2019-10-14 15:27:29	43752.6	0.644086	89.1083	86.04	91.25	86.08
2019-10-14 15:27:29	43752.6	0.644086	89.1534	86.08	91.37	85.98
2019-10-14 15:27:29	43752.6	0.644086	89.1429	86.14	91.32	86.02
2019-10-14 15:27:29	43752.6	0.644086	89.0363	85.82	91.16	86.1
2019-10-14 15:27:29	43752.6	0.644086	88.9247	85.47	91.14	85.9
2019-10-14 15:27:29	43752.6	0.644086	88.9495	85.82	91.17	85.79
2019-10-14 15:27:29	43752.6	0.644086	89.054	85.91	91.3	85.85
2019-10-14 15:27:29	43752.6	0.644086	88.9614	85.71	91.12	85.97
2019-10-14 15:27:29	43752.6	0.644086	89.1033	86.13	91.28	85.97
2019-10-14 15:27:29	43752.6	0.644086	88.902	85.87	91.12	85.71
2019-10-14 15:27:29	43752.6	0.644086	88.9453	85.86	91.15	85.8
2019-10-14 15:27:29	43752.6	0.644086	88.8158	85.71	91.04	85.64
2019-10-14 15:27:29	43752.6	0.644086	89.104	85.92	91.21	86.19
2019-10-14 15:27:29	43752.6	0.644086	89.0321	85.84	91.2	86
2019-10-14 15:27:29	43752.6	0.644086	88.9789	85.81	91.11	86.01
2019-10-14 15:27:29	43752.6	0.644086	89.1201	85.86	91.29	86.11
2019-10-14 15:27:29	43752.6	0.644086	88.8681	85.83	91.07	85.71
2019-10-14 15:27:29	43752.6	0.644086	89.049	85.99	91.23	85.94
2019-10-14 15:27:29	43752.6	0.644086	89.1578	85.73	91.4	86.07
2019-10-14 15:27:29	43752.6	0.644086	89.4973	86.27	91.69	86.43
2019-10-14 15:27:29	43752.6	0.644086	89.3089	86.2	91.52	86.16
2019-10-14 15:27:29	43752.6	0.644086	89.1384	85.92	91.34	86.05
2019-10-14 15:27:29	43752.6	0.644086	89.2244	86.21	91.43	86.05
2019-10-14 15:27:29	43752.6	0.644086	88.948	85.99	91.17	85.72
2019-10-14 15:27:29	43752.6	0.644086	88.6422	85.64	90.88	85.4
2019-10-14 15:27:29	43752.6	0.644086	88.7886	85.63	91.05	85.56
2019-10-14 15:27:29	43752.6	0.644086	89.2563	86.28	91.43	86.13
2019-10-14 15:27:29	43752.6	0.644086	89.4069	86.41	91.59	86.27
2019-10-14 15:27:29	43752.6	0.644086	89.2661	86.19	91.5	86.06
2019-10-14 15:27:29	43752.6	0.644086	89.2929	86.27	91.53	86.06
2019-10-14 15:27:29	43752.6	0.644086	88.5748	85.49	90.83	85.33
2019-10-14 15:27:29	43752.6	0.644086	88.3957	85.29	90.63	85.2
2019-10-14 15:27:29	43752.6	0.644086	88.372	85.34	90.59	85.18
2019-10-14 15:27:29	43752.6	0.644086	88.5888	85.4	90.79	85.49
2019-10-14 15:27:29	43752.6	0.644086	88.7448	85.6	90.92	85.68
2019-10-14 15:27:29	43752.6	0.644086	89.404	86.36	91.6	86.26
2019-10-14 15:27:29	43752.6	0.644086	89.3036	86.36	91.49	86.14
2019-10-14 15:27:29	43752.6	0.644086	89.3675	86.24	91.5	86.38
2019-10-14 15:27:29	43752.6	0.644086	88.8281	85.68	90.97	85.83
2019-10-14 15:27:29	43752.6	0.644086	88.7283	85.51	90.94	85.62
2019-10-14 15:27:29	43752.6	0.644086	88.5535	85.3	90.79	85.41
2019-10-14 15:27:29	43752.6	0.644086	88.401	85.23	90.61	85.28
2019-10-14 15:27:29	43752.6	0.644086	88.3347	85.27	90.53	85.2
2019-10-14 15:27:29	43752.6	0.644086	88.3285	85.03	90.5	85.33
2019-10-14 15:27:29	43752.6	0.644086	88.7354	85.58	91.02	85.46
2019-10-14 15:27:29	43752.6	0.644086	88.743	85.67	90.99	85.51
2019-10-14 15:27:29	43752.6	0.644086	88.7811	85.69	91	85.61
2019-10-14 15:27:29	43752.6	0.644086	88.8526	85.65	91.14	85.59
2019-10-14 15:27:29	43752.6	0.644086	88.4241	85.38	90.61	85.3
2019-10-14 15:27:29	43752.6	0.644086	88.5337	85.46	90.72	85.42
2019-10-14 15:27:29	43752.6	0.644086	88.455	85.32	90.71	85.23
2019-10-14 15:27:29	43752.6	0.644086	88.3916	85.3	90.56	85.32
2019-10-14 15:27:29	43752.6	0.644086	88.3464	85.17	90.6	85.14
2019-10-14 15:27:29	43752.6	0.644086	88.3299	85.05	90.58	85.17
2019-10-14 15:27:29	43752.6	0.644086	88.5093	85.14	90.7	85.5
2019-10-14 15:27:29	43752.6	0.644086	88.4211	85.51	90.61	85.24
2019-10-14 15:27:29	43752.6	0.644086	88.3283	85.21	90.49	85.28
2019-10-14 15:27:29	43752.6	0.644086	88.2515	84.99	90.56	84.97
2019-10-14 15:27:29	43752.6	0.644086	88.8534	85.84	91.15	85.5
2019-10-14 15:27:29	43752.6	0.644086	88.7911	85.71	91.11	85.42
2019-10-14 15:27:29	43752.6	0.644086	88.6691	85.43	90.87	85.59
2019-10-14 15:27:29	43752.6	0.644086	88.7004	85.45	90.95	85.53
2019-10-14 15:27:29	43752.6	0.644086	88.9009	85.91	91.09	85.75
2019-10-14 15:27:29	43752.6	0.644086	89.0142	85.74	91.25	85.88
2019-10-14 15:27:29	43752.6	0.644086	89.1157	86.03	91.29	86.03
2019-10-14 15:27:29	43752.6	0.644086	89.0596	85.93	91.27	85.92
2019-10-14 15:27:29	43752.6	0.644086	88.7469	85.64	90.87	85.77
2019-10-14 15:27:29	43752.6	0.644086	88.5169	85.31	90.69	85.48
2019-10-14 15:27:29	43752.6	0.644086	88.6909	85.42	90.95	85.51
2019-10-14 15:27:29	43752.6	0.644086	88.8359	85.81	91.07	85.61
2019-10-14 15:27:29	43752.6	0.644086	88.8206	85.59	90.99	85.8
2019-10-14 15:27:29	43752.6	0.644086	88.9249	85.81	91.13	85.79
2019-10-14 15:27:29	43752.6	0.644086	89.0144	85.84	91.18	85.98
2019-10-14 15:27:29	43752.6	0.644086	88.8338	85.6	90.98	85.86
2019-10-14 15:27:29	43752.6	0.644086	88.7534	85.65	90.93	85.67
2019-10-14 15:27:29	43752.6	0.644086	88.9761	85.87	91.17	85.86
2019-10-14 15:27:29	43752.6	0.644086	88.7459	85.64	90.96	85.59
2019-10-14 15:27:29	43752.6	0.644086	88.9484	85.86	91.14	85.83
2019-10-14 15:27:29	43752.6	0.644086	88.9198	85.69	91.16	85.76
2019-10-14 15:27:29	43752.6	0.644086	88.9513	85.91	91.13	85.84
2019-10-14 15:27:29	43752.6	0.644086	88.4264	85.29	90.56	85.44
2019-10-14 15:27:29	43752.6	0.644086	88.4388	85.25	90.64	85.34
2019-10-14 15:27:29	43752.6	0.644086	88.6315	85.31	90.86	85.53
2019-10-14 15:27:29	43752.6	0.644086	88.7715	85.55	90.96	85.71
2019-10-14 15:27:29	43752.6	0.644086	89.1788	86.06	91.3	86.21
2019-10-14 15:27:29	43752.6	0.644086	89.1125	85.98	91.33	85.96
2019-10-14 15:27:29	43752.6	0.644086	89.0856	85.9	91.31	85.94
2019-10-14 15:27:29	43752.6	0.644086	88.9273	85.72	91.06	85.97
2019-10-14 15:27:29	43752.6	0.644086	88.7925	85.53	91.01	85.69
2019-10-14 15:27:29	43752.6	0.644086	88.8007	85.66	91.08	85.53
2019-10-14 15:27:29	43752.6	0.644086	88.5234	85.25	90.83	85.25
2019-10-14 15:27:29	43752.6	0.644086	85.113	80.53	87.67	81.85
2019-10-14 15:27:29	43752.6	0.644086	88.6693	85.05	90.97	85.54
2019-10-14 15:27:29	43752.6	0.644086	89.4403	86.16	91.66	86.34
2019-10-14 15:27:29	43752.6	0.644086	90.2176	87.15	92.42	87.07
2019-10-14 15:27:29	43752.6	0.644086	89.3747	86.34	91.61	86.15
2019-10-14 15:27:29	43752.6	0.644086	89.328	86.14	91.6	86.09
2019-10-14 15:27:29	43752.6	0.644086	89.6694	86.67	91.89	86.46
2019-10-14 15:27:29	43752.6	0.644086	89.5162	86.52	91.76	86.26
2019-10-14 15:27:29	43752.6	0.644086	89.8289	86.72	92.04	86.68
2019-10-14 15:27:29	43752.6	0.644086	89.6857	86.37	91.91	86.59
2019-10-14 15:27:29	43752.6	0.644086	89.9592	86.82	92.1	86.96
2019-10-14 15:27:29	43752.6	0.644086	90.086	86.92	92.21	87.13
2019-10-14 15:27:29	43752.6	0.644086	90.2296	87.07	92.4	87.18
2019-10-14 15:27:29	43752.6	0.644086	89.7436	86.56	91.88	86.77
2019-10-14 15:27:29	43752.6	0.644086	89.7745	86.65	91.91	86.78
2019-10-14 15:27:29	43752.6	0.644086	89.0015	85.73	91.21	85.92
2019-10-14 15:27:29	43752.6	0.644086	88.6469	85.39	90.84	85.59
2019-10-14 15:27:29	43752.6	0.644086	88.3437	85.35	90.55	85.16
2019-10-14 15:27:29	43752.6	0.644086	88.2738	85.12	90.43	85.25
2019-10-14 15:27:29	43752.6	0.644086	87.9832	84.67	90.16	84.98
2019-10-14 15:27:29	43752.6	0.644086	88.1945	84.87	90.42	85.1
2019-10-14 15:27:29	43752.6	0.644086	88.0446	84.84	90.16	85.12
2019-10-14 15:27:29	43752.6	0.644086	88.543	85.44	90.75	85.4
2019-10-14 15:27:29	43752.6	0.644086	88.4619	85.32	90.63	85.41
2019-10-14 15:27:29	43752.6	0.644086	88.3624	85.33	90.54	85.25
2019-10-14 15:27:29	43752.6	0.644086	88.5774	85.58	90.71	85.54
2019-10-14 15:27:29	43752.6	0.644086	88.5902	85.59	90.74	85.52
2019-10-14 15:27:29	43752.6	0.644086	88.721	85.55	90.93	85.6
2019-10-14 15:27:29	43752.6	0.644086	88.695	85.74	90.92	85.46
2019-10-14 15:27:29	43752.6	0.644086	88.7449	85.5	90.95	85.66
2019-10-14 15:27:29	43752.6	0.644086	88.6295	85.45	90.87	85.45
2019-10-14 15:27:29	43752.6	0.644086	88.6811	85.54	90.92	85.49
2019-10-14 16:02:15	43752.7	0.668229	87.7709	83.89	90.2	84.49
2019-10-14 16:02:15	43752.7	0.668229	88.355	84.64	90.82	84.94
2019-10-14 16:02:14	43752.7	0.668229	88.3268	84.46	90.7	85.15
2019-10-14 16:02:14	43752.7	0.668229	88.0185	84.15	90.5	84.63
2019-10-14 16:02:14	43752.7	0.668229	88.1278	84.43	90.55	84.79
2019-10-14 16:02:14	43752.7	0.668229	88.063	84.07	90.52	84.77
2019-10-14 16:02:14	43752.7	0.668229	88.1663	84.23	90.67	84.76
2019-10-14 16:02:14	43752.7	0.668229	88.3766	84.62	90.82	85.02
2019-10-14 16:02:14	43752.7	0.668229	88.0853	84.11	90.54	84.79
2019-10-14 16:02:14	43752.7	0.668229	88.0641	84.29	90.53	84.67
2019-10-14 16:02:14	43752.7	0.668229	88.5574	84.59	90.92	85.44
2019-10-14 16:02:14	43752.7	0.668229	88.7045	84.92	91.03	85.59
2019-10-14 16:02:14	43752.7	0.668229	87.9161	84.15	90.31	84.66
2019-10-14 16:02:14	43752.7	0.668229	88.0401	84.44	90.47	84.65
2019-10-14 16:02:14	43752.7	0.668229	87.7696	83.9	90.16	84.56
2019-10-14 16:02:14	43752.7	0.668229	88.2614	84.43	90.63	85.08
2019-10-14 16:02:14	43752.7	0.668229	88.0105	84.18	90.46	84.67
2019-10-14 16:02:14	43752.7	0.668229	88.1849	84.36	90.6	84.91
2019-10-14 16:02:14	43752.7	0.668229	88.0659	84.33	90.51	84.7
2019-10-14 16:02:14	43752.7	0.668229	87.5491	83.76	90	84.19
2019-10-14 16:02:14	43752.7	0.668229	88.1583	84.41	90.55	84.9
2019-10-14 16:02:14	43752.7	0.668229	88.2555	84.31	90.73	84.91
2019-10-14 16:02:14	43752.7	0.668229	87.578	83.62	89.99	84.36
2019-10-14 16:02:14	43752.7	0.668229	88.6955	84.87	91.06	85.52
2019-10-14 16:02:14	43752.7	0.668229	88.2623	84.6	90.68	84.92
2019-10-14 16:02:14	43752.7	0.668229	87.6281	83.78	90.09	84.27
2019-10-14 16:02:14	43752.7	0.668229	88.2498	84.26	90.73	84.91
2019-10-14 16:02:14	43752.7	0.668229	88.542	84.66	90.88	85.44
2019-10-14 16:02:14	43752.7	0.668229	88.4629	84.65	90.9	85.14
2019-10-14 16:02:14	43752.7	0.668229	88.4358	84.56	90.8	85.28
2019-10-14 16:02:14	43752.7	0.668229	88.0391	84.35	90.44	84.74
2019-10-14 16:02:14	43752.7	0.668229	87.6185	83.62	90.11	84.26
2019-10-14 16:02:14	43752.7	0.668229	88.5786	84.73	90.99	85.32
2019-10-14 16:02:14	43752.7	0.668229	88.0275	84.12	90.46	84.75
2019-10-14 16:02:14	43752.7	0.668229	88.0111	84.05	90.41	84.82
2019-10-14 16:02:14	43752.7	0.668229	88.776	85.14	91.17	85.47
2019-10-14 16:02:14	43752.7	0.668229	88.4797	84.64	90.9	85.2
2019-10-14 16:02:14	43752.7	0.668229	87.9775	84.12	90.39	84.72
2019-10-14 16:02:14	43752.7	0.668229	88.769	85	91.16	85.52
2019-10-14 16:02:14	43752.7	0.668229	88.6612	84.89	91.12	85.28
2019-10-14 16:02:14	43752.7	0.668229	87.4949	83.39	89.99	84.17
2019-10-14 16:02:14	43752.7	0.668229	88.6643	84.73	91.08	85.43
2019-10-14 16:02:14	43752.7	0.668229	88.0601	84.04	90.47	84.87
2019-10-14 16:02:14	43752.7	0.668229	88.0909	84.26	90.5	84.83
2019-10-14 16:02:14	43752.7	0.668229	88.4484	84.55	90.9	85.13
2019-10-14 16:02:14	43752.7	0.668229	88.1854	84.36	90.56	84.99
2019-10-14 16:02:14	43752.7	0.668229	87.7505	83.84	90.18	84.48
2019-10-14 16:32:15	43752.7	0.689063	82.8043	79.54	85.66	78.45
2019-10-14 16:32:15	43752.7	0.689063	82.8566	79.49	85.82	78.33
2019-10-14 16:32:15	43752.7	0.689063	86.3095	83.31	88.79	82.59
2019-10-14 16:32:15	43752.7	0.689063	85.7761	82.72	88.22	82.15
2019-10-14 16:32:15	43752.7	0.689063	81.1763	77.58	84.22	76.58
2019-10-14 16:32:15	43752.7	0.689063	81.7156	78.31	84.63	77.3
2019-10-14 16:32:15	43752.7	0.689063	87.7446	84.91	90.17	84.07
2019-10-14 16:32:15	43752.7	0.689063	86.3892	83.63	88.68	82.95
2019-10-14 16:32:15	43752.7	0.689063	87.8866	85.16	90.19	84.41
2019-10-14 16:32:15	43752.7	0.689063	85.8197	82.96	88.11	82.42
2019-10-14 16:32:15	43752.7	0.689063	86.8772	83.89	89.13	83.6
2019-10-14 16:32:15	43752.7	0.689063	82.6801	79.26	85.62	78.22
2019-10-14 16:32:15	43752.7	0.689063	82.502	78.85	85.58	77.86
2019-10-14 16:32:15	43752.7	0.689063	86.3701	83.29	88.78	82.82
2019-10-14 16:32:15	43752.7	0.689063	82.1333	78.65	84.97	77.9
2019-10-14 16:32:15	43752.7	0.689063	86.9842	84.14	89.34	83.45
2019-10-14 16:32:15	43752.7	0.689063	82.4224	79.24	85.2	78.19
2019-10-14 16:32:15	43752.7	0.689063	82.0104	78.56	84.88	77.7
2019-10-14 16:32:15	43752.7	0.689063	86.7138	83.81	89.03	83.28
2019-10-14 16:32:15	43752.7	0.689063	87.8187	85.13	90.07	84.43
2019-10-14 16:32:15	43752.7	0.689063	87.5418	84.91	89.86	84
2019-10-14 16:32:15	43752.7	0.689063	83.3356	79.64	86.22	79.09
2019-10-14 16:32:15	43752.7	0.689063	87.4465	84.67	89.78	83.93
2019-10-14 16:32:15	43752.7	0.689063	87.119	84.14	89.58	83.43
2019-10-14 16:32:15	43752.7	0.689063	82.2633	78.56	85.25	77.82
2019-10-14 16:32:15	43752.7	0.689063	81.7931	78.14	84.78	77.33
2019-10-14 16:32:15	43752.7	0.689063	83.4987	80.31	86.24	79.34
2019-10-14 16:32:15	43752.7	0.689063	87.0097	84.23	89.32	83.54
2019-10-14 16:32:15	43752.7	0.689063	82.6129	79.32	85.56	78.09
2019-10-14 16:32:15	43752.7	0.689063	82.5224	79.17	85.43	78.1
2019-10-14 16:32:15	43752.7	0.689063	86.9783	84.5	89.28	83.41
2019-10-14 16:32:15	43752.7	0.689063	87.7224	84.86	90.04	84.27
2019-10-14 16:32:15	43752.7	0.689063	88.4004	85.6	90.71	84.94
2019-10-14 16:32:15	43752.7	0.689063	87.5262	84.62	89.89	84
2019-10-14 16:32:15	43752.7	0.689063	86.7053	83.48	89.08	83.28
2019-10-14 16:32:15	43752.7	0.689063	83.0381	79.74	86.05	78.39
2019-10-14 16:32:15	43752.7	0.689063	82.9082	79.4	85.9	78.38
2019-10-14 16:32:15	43752.7	0.689063	86.9634	83.98	89.3	83.52
2019-10-14 16:32:15	43752.7	0.689063	82.7612	79.02	85.53	78.76
2019-10-14 16:32:15	43752.7	0.689063	82.567	79.17	85.45	78.21
2019-10-14 16:32:15	43752.7	0.689063	81.9573	78.52	84.94	77.42
2019-10-14 16:32:15	43752.7	0.689063	87.5964	84.77	90.23	83.51
2019-10-14 16:32:15	43752.7	0.689063	87.1063	84.61	89.38	83.6
2019-10-14 16:32:15	43752.7	0.689063	87.7685	84.67	90.12	84.34
2019-10-14 16:32:15	43752.7	0.689063	88.0389	85.35	90.27	84.69
2019-10-14 16:32:15	43752.7	0.689063	83.2321	80.12	85.95	79.09
2019-10-14 16:32:15	43752.7	0.689063	82.3915	78.89	85.45	77.73
2019-10-14 17:02:15	43752.7	0.709896	83.0547	79.98	85.95	78.55
2019-10-14 17:02:15	43752.7	0.709896	82.551	79.74	85.5	77.84
2019-10-14 17:02:14	43752.7	0.709896	83.1853	80.18	85.94	78.93
2019-10-14 17:02:14	43752.7	0.709896	83.3777	80.29	86.17	79.08
2019-10-14 17:02:14	43752.7	0.709896	82.4976	79.3	85.51	77.81
2019-10-14 17:02:14	43752.7	0.709896	83.0856	79.99	85.96	78.63
2019-10-14 17:02:14	43752.7	0.709896	83.1909	80.14	86.1	78.65
2019-10-14 17:02:14	43752.7	0.709896	83.2061	80.17	86.12	78.65
2019-10-14 17:02:14	43752.7	0.709896	83.6266	80.44	86.56	79.09
2019-10-14 17:02:14	43752.7	0.709896	83.2736	80.11	86.15	78.84
2019-10-14 17:02:14	43752.7	0.709896	82.8448	80.01	85.78	78.17
2019-10-14 17:02:14	43752.7	0.709896	83.0578	79.8	85.97	78.59
2019-10-14 17:02:14	43752.7	0.709896	83.377	80.5	86.24	78.86
2019-10-14 17:02:14	43752.7	0.709896	82.91	79.54	85.83	78.47
2019-10-14 17:02:14	43752.7	0.709896	82.6695	79.85	85.65	77.9
2019-10-14 17:02:14	43752.7	0.709896	83.1559	79.92	86.18	78.46
2019-10-14 17:02:14	43752.7	0.709896	83.0153	79.71	85.91	78.6
2019-10-14 17:02:14	43752.7	0.709896	83.3554	80.25	86.15	79.06
2019-10-14 17:02:14	43752.7	0.709896	83.0737	79.94	85.98	78.57
2019-10-14 17:02:14	43752.7	0.709896	82.7364	79.49	85.61	78.34
2019-10-14 17:02:14	43752.7	0.709896	82.9265	79.87	85.86	78.34
2019-10-14 17:02:14	43752.7	0.709896	82.636	79.75	85.49	78.14
2019-10-14 17:02:14	43752.7	0.709896	83.3473	80.19	86.26	78.84
2019-10-14 17:02:14	43752.7	0.709896	82.8465	79.71	85.77	78.31
2019-10-14 17:02:14	43752.7	0.709896	82.8349	79.35	85.79	78.37
2019-10-14 17:02:14	43752.7	0.709896	83.4244	80.27	86.33	78.93
2019-10-14 17:02:14	43752.7	0.709896	82.7143	79.64	85.65	78.13
2019-10-14 17:02:14	43752.7	0.709896	82.8756	80.02	85.8	78.23
2019-10-14 17:02:14	43752.7	0.709896	82.6629	79.52	85.54	78.22
2019-10-14 17:02:14	43752.7	0.709896	82.6038	79.65	85.47	78.11
2019-10-14 17:02:14	43752.7	0.709896	83.1909	80.11	86.06	78.74
2019-10-14 17:02:14	43752.7	0.709896	82.7844	79.99	85.63	78.27
2019-10-14 17:02:14	43752.7	0.709896	82.9018	79.86	85.83	78.32
2019-10-14 17:02:14	43752.7	0.709896	83.6798	80.7	86.6	79.09
2019-10-14 17:02:14	43752.7	0.709896	82.728	79.55	85.64	78.23
2019-10-14 17:02:14	43752.7	0.709896	83.0235	80.02	85.94	78.45
2019-10-14 17:02:14	43752.7	0.709896	82.9006	79.91	85.92	78.12
2019-10-14 17:02:14	43752.7	0.709896	83.1845	80.32	86.11	78.54
2019-10-14 17:02:14	43752.7	0.709896	82.7938	79.74	85.71	78.24
2019-10-14 17:02:14	43752.7	0.709896	83.1573	80.26	86.06	78.57
2019-10-14 17:02:14	43752.7	0.709896	83.3396	80.38	86.22	78.82
2019-10-14 17:02:14	43752.7	0.709896	82.668	79.81	85.65	77.91
2019-10-14 17:02:14	43752.7	0.709896	83.2562	80.19	86.12	78.81
2019-10-14 17:02:14	43752.7	0.709896	83.0743	79.94	85.93	78.67
2019-10-14 17:02:14	43752.7	0.709896	82.7374	79.43	85.71	78.17
2019-10-14 17:02:14	43752.7	0.709896	83.052	79.93	85.95	78.56
2019-10-14 17:02:14	43752.7	0.709896	82.9645	80.1	85.89	78.32
2019-10-14 17:32:15	43752.7	0.730729	86.751	81.96	89.48	83.23
2019-10-14 17:32:15	43752.7	0.730729	84.4517	80.64	86.99	80.93
2019-10-14 17:32:14	43752.7	0.730729	86.6355	82.02	89.2	83.37
2019-10-14 17:32:14	43752.7	0.730729	90.282	86.14	92.63	87.26
2019-10-14 17:32:14	43752.7	0.730729	92.5374	88.07	94.86	89.69
2019-10-14 17:32:14	43752.7	0.730729	90.1492	86.05	92.62	86.87
2019-10-14 17:32:14	43752.7	0.730729	85.9753	81.73	88.6	82.45
2019-10-14 17:32:14	43752.7	0.730729	84.1764	79.24	86.86	80.8
2019-10-14 17:32:14	43752.7	0.730729	91.1093	86.95	93.49	88.03
2019-10-14 17:32:14	43752.7	0.730729	90.557	86.32	92.87	87.64
2019-10-14 17:32:14	43752.7	0.730729	85.182	80.74	87.93	81.49
2019-10-14 17:32:14	43752.7	0.730729	83.0702	78.45	86.01	79.07
2019-10-14 17:32:14	43752.7	0.730729	88.9458	84.49	91.52	85.6
2019-10-14 17:32:14	43752.7	0.730729	89.8103	85.35	92.24	86.75
2019-10-14 17:32:14	43752.7	0.730729	86.8621	82.61	89.41	83.49
2019-10-14 17:32:14	43752.7	0.730729	88.8573	84.91	91.43	85.32
2019-10-14 17:32:14	43752.7	0.730729	88.9058	84.16	91.45	85.73
2019-10-14 17:32:14	43752.7	0.730729	88.308	84.26	90.87	84.83
2019-10-14 17:32:14	43752.7	0.730729	87.1122	83.54	89.39	84.01
2019-10-14 17:32:14	43752.7	0.730729	86.4769	82.19	89.08	83.01
2019-10-14 17:32:14	43752.7	0.730729	87.3952	83.2	90.01	83.87
2019-10-14 17:32:14	43752.7	0.730729	78.5603	73.9	81.61	74.36
2019-10-14 17:32:14	43752.7	0.730729	87.2528	82.07	90.1	83.65
2019-10-14 17:32:14	43752.7	0.730729	83.3959	79.57	85.99	79.77
2019-10-14 17:32:14	43752.7	0.730729	85.0044	80.85	87.56	81.58
2019-10-14 17:32:14	43752.7	0.730729	89.8477	85.3	92.39	86.6
2019-10-14 17:32:14	43752.7	0.730729	83.3478	79.33	85.96	79.76
2019-10-14 17:32:14	43752.7	0.730729	83.8936	80.05	86.49	80.27
2019-10-14 17:32:14	43752.7	0.730729	86.509	82.71	89.13	82.82
2019-10-14 17:32:14	43752.7	0.730729	86.1162	81.7	88.79	82.56
2019-10-14 17:32:14	43752.7	0.730729	89.7398	85.29	92.32	86.38
2019-10-14 17:32:14	43752.7	0.730729	86.1751	82.36	88.68	82.72
2019-10-14 17:32:14	43752.7	0.730729	80.8294	75.98	83.89	76.68
2019-10-14 17:32:14	43752.7	0.730729	93.2756	88.92	95.55	90.48
2019-10-14 17:32:14	43752.7	0.730729	86.8667	83.17	89.38	83.35
2019-10-14 17:32:14	43752.7	0.730729	83.5341	79.44	86.2	79.87
2019-10-14 17:32:14	43752.7	0.730729	83.6336	78.81	86.36	80.13
2019-10-14 17:32:14	43752.7	0.730729	83.7197	79.49	86.42	80.04
2019-10-14 17:32:14	43752.7	0.730729	87.1998	83.6	89.66	83.75
2019-10-14 17:32:14	43752.7	0.730729	85.5787	81.82	88.1	82.07
2019-10-14 17:32:14	43752.7	0.730729	89.4848	84.81	92.03	86.28
2019-10-14 17:32:14	43752.7	0.730729	86.235	82.78	88.69	82.74
2019-10-14 17:32:14	43752.7	0.730729	87.6632	83.06	90.27	84.31
2019-10-14 17:32:14	43752.7	0.730729	84.9355	80.14	87.79	81.17
2019-10-14 17:32:14	43752.7	0.730729	85.598	81.6	88.13	82.16
2019-10-14 17:32:14	43752.7	0.730729	90.8507	87.17	93.21	87.63
2019-10-14 17:32:14	43752.7	0.730729	84.601	80.2	87.31	80.97
2019-10-14 18:02:15	43752.8	0.751563	85.1985	80.69	88.08	81.27
2019-10-14 18:02:15	43752.8	0.751563	82.4153	78.43	85.3	78.28
2019-10-14 18:02:15	43752.8	0.751563	84.6402	80.71	87.43	80.67
2019-10-14 18:02:15	43752.8	0.751563	83.6687	79.77	86.36	79.88
2019-10-14 18:02:15	43752.8	0.751563	83.4447	79.38	86.36	79.28
2019-10-14 18:02:15	43752.8	0.751563	83.2249	78.94	86.01	79.4
2019-10-14 18:02:15	43752.8	0.751563	84.6888	80.23	87.52	80.84
2019-10-14 18:02:15	43752.8	0.751563	85.0686	80.71	87.87	81.24
2019-10-14 18:02:15	43752.8	0.751563	83.1592	78.6	86	79.33
2019-10-14 18:02:15	43752.8	0.751563	83.0776	79.15	85.83	79.18
2019-10-14 18:02:15	43752.8	0.751563	83.4496	79.61	86.41	79.11
2019-10-14 18:02:15	43752.8	0.751563	84.5892	80.88	87.31	80.67
2019-10-14 18:02:15	43752.8	0.751563	85.053	81.47	87.69	81.25
2019-10-14 18:02:15	43752.8	0.751563	83.5235	79.4	86.2	79.85
2019-10-14 18:02:15	43752.8	0.751563	83.2724	78.98	86.18	79.21
2019-10-14 18:02:15	43752.8	0.751563	82.7466	79.05	85.54	78.68
2019-10-14 18:02:15	43752.8	0.751563	84.1619	80.23	86.79	80.51
2019-10-14 18:02:15	43752.8	0.751563	82.5039	78.94	85.27	78.44
2019-10-14 18:02:15	43752.8	0.751563	83.542	79.19	86.41	79.58
2019-10-14 18:02:15	43752.8	0.751563	84.6553	80.33	87.53	80.67
2019-10-14 18:02:15	43752.8	0.751563	82.8789	79.2	85.67	78.81
2019-10-14 18:02:15	43752.8	0.751563	84.4529	80.28	87.21	80.64
2019-10-14 18:02:15	43752.8	0.751563	84.9472	81.06	87.61	81.21
2019-10-14 18:02:15	43752.8	0.751563	82.8679	78.64	85.73	78.87
2019-10-14 18:02:15	43752.8	0.751563	82.7508	78.44	85.6	78.81
2019-10-14 18:02:15	43752.8	0.751563	84.6834	80.98	87.4	80.77
2019-10-14 18:02:15	43752.8	0.751563	84.6155	80.55	87.46	80.59
2019-10-14 18:02:15	43752.8	0.751563	82.0577	78.09	84.93	77.94
2019-10-14 18:02:15	43752.8	0.751563	83.0797	79.48	85.81	79.1
2019-10-14 18:02:15	43752.8	0.751563	83.7588	79.26	86.72	79.67
2019-10-14 18:02:15	43752.8	0.751563	84.4391	80.78	87.15	80.52
2019-10-14 18:02:15	43752.8	0.751563	82.7017	78.48	85.59	78.65
2019-10-14 18:02:15	43752.8	0.751563	84.1059	80.56	86.89	80
2019-10-14 18:02:15	43752.8	0.751563	85.2048	81.5	87.79	81.55
2019-10-14 18:02:15	43752.8	0.751563	84.3602	80.77	87.15	80.26
2019-10-14 18:02:15	43752.8	0.751563	82.1792	78.33	85.07	77.98
2019-10-14 18:02:15	43752.8	0.751563	83.6715	78.9	86.56	79.83
2019-10-14 18:02:15	43752.8	0.751563	82.7331	79.04	85.57	78.58
2019-10-14 18:02:15	43752.8	0.751563	83.8968	80.54	86.68	79.72
2019-10-14 18:02:15	43752.8	0.751563	83.7122	79.18	86.59	79.8
2019-10-14 18:02:15	43752.8	0.751563	83.4082	78.79	86.26	79.58
2019-10-14 18:02:15	43752.8	0.751563	82.8308	79.25	85.67	78.63
2019-10-14 18:02:15	43752.8	0.751563	84.9523	81.59	87.5	81.24
2019-10-14 18:02:15	43752.8	0.751563	84.5187	80.35	87.39	80.48
2019-10-14 18:02:15	43752.8	0.751563	82.7006	78.88	85.51	78.65
2019-10-14 18:02:15	43752.8	0.751563	83.5981	79.71	86.45	79.49
2019-10-14 18:02:15	43752.8	0.751563	83.0348	79.12	85.88	78.95
2019-10-14 18:32:15	43752.8	0.772396	91.304	87.87	93.52	88.27
2019-10-14 18:32:15	43752.8	0.772396	92.2825	88.65	94.46	89.4
2019-10-14 18:32:14	43752.8	0.772396	91.4803	87.75	93.63	88.69
2019-10-14 18:32:14	43752.8	0.772396	90.9857	87.46	93.2	87.99
2019-10-14 18:32:14	43752.8	0.772396	91.7268	88.15	93.86	88.91
2019-10-14 18:32:14	43752.8	0.772396	91.555	88.1	93.74	88.59
2019-10-14 18:32:14	43752.8	0.772396	91.8865	88.34	94.09	88.92
2019-10-14 18:32:14	43752.8	0.772396	91.6272	88.03	93.79	88.76
2019-10-14 18:32:14	43752.8	0.772396	91.531	87.97	93.76	88.52
2019-10-14 18:32:14	43752.8	0.772396	91.7268	88.36	93.87	88.81
2019-10-14 18:32:14	43752.8	0.772396	92.5338	88.98	94.61	89.82
2019-10-14 18:32:14	43752.8	0.772396	91.8886	88.43	94.02	89.03
2019-10-14 18:32:14	43752.8	0.772396	91.5202	88.17	93.56	88.8
2019-10-14 18:32:14	43752.8	0.772396	91.7452	88.27	93.98	88.69
2019-10-14 18:32:14	43752.8	0.772396	92.3025	88.66	94.38	89.62
2019-10-14 18:32:14	43752.8	0.772396	91.3794	87.78	93.61	88.38
2019-10-14 18:32:14	43752.8	0.772396	91.6821	88.33	93.82	88.77
2019-10-14 18:32:14	43752.8	0.772396	91.5965	87.97	93.78	88.7
2019-10-14 18:32:14	43752.8	0.772396	91.5402	87.97	93.74	88.59
2019-10-14 18:32:14	43752.8	0.772396	92.4474	88.83	94.65	89.51
2019-10-14 18:32:14	43752.8	0.772396	91.4666	88.07	93.59	88.6
2019-10-14 18:32:14	43752.8	0.772396	91.8381	88.3	94	88.95
2019-10-14 18:32:14	43752.8	0.772396	91.4726	87.97	93.63	88.58
2019-10-14 18:32:14	43752.8	0.772396	91.2351	87.42	93.47	88.31
2019-10-14 18:32:14	43752.8	0.772396	91.5061	88.09	93.74	88.43
2019-10-14 18:32:14	43752.8	0.772396	91.3406	87.72	93.52	88.45
2019-10-14 18:32:14	43752.8	0.772396	91.7588	88.2	93.92	88.88
2019-10-14 18:32:14	43752.8	0.772396	91.7649	88.15	93.93	88.9
2019-10-14 18:32:14	43752.8	0.772396	91.3779	87.79	93.58	88.43
2019-10-14 18:32:14	43752.8	0.772396	92.0163	88.21	94.25	89.09
2019-10-14 18:32:14	43752.8	0.772396	91.8382	88.4	93.94	89.03
2019-10-14 18:32:14	43752.8	0.772396	92.3622	88.83	94.52	89.48
2019-10-14 18:32:14	43752.8	0.772396	91.63	88.16	93.8	88.7
2019-10-14 18:32:14	43752.8	0.772396	91.9745	88.46	94.13	89.09
2019-10-14 18:32:14	43752.8	0.772396	90.6154	87.01	92.84	87.63
2019-10-14 18:32:14	43752.8	0.772396	91.8363	88.21	94.04	88.9
2019-10-14 18:32:14	43752.8	0.772396	91.7946	88.1	93.97	88.94
2019-10-14 18:32:14	43752.8	0.772396	91.8219	88.19	94.05	88.84
2019-10-14 18:32:14	43752.8	0.772396	92.2635	88.61	94.41	89.45
2019-10-14 18:32:14	43752.8	0.772396	91.5292	87.85	93.76	88.56
2019-10-14 18:32:14	43752.8	0.772396	91.1833	87.81	93.28	88.36
2019-10-14 18:32:14	43752.8	0.772396	92.2811	88.61	94.44	89.45
2019-10-14 18:32:14	43752.8	0.772396	90.7273	87.16	92.92	87.79
2019-10-14 18:32:14	43752.8	0.772396	91.7999	88.31	94.04	88.74
2019-10-14 18:32:14	43752.8	0.772396	92.0605	88.52	94.27	89.08
2019-10-14 18:32:14	43752.8	0.772396	91.3456	87.67	93.63	88.27
2019-10-14 18:32:14	43752.8	0.772396	92.2978	88.63	94.49	89.4
2019-10-14 19:02:15	43752.8	0.793229	91.8872	88.14	94.12	88.94
2019-10-14 19:02:15	43752.8	0.793229	91.7384	88.28	93.89	88.84
2019-10-14 19:02:14	43752.8	0.793229	91.2773	87.58	93.47	88.39
2019-10-14 19:02:14	43752.8	0.793229	91.2414	87.48	93.52	88.21
2019-10-14 19:02:14	43752.8	0.793229	91.6085	87.97	93.78	88.74
2019-10-14 19:02:14	43752.8	0.793229	91.9248	88.26	94.12	89.02
2019-10-14 19:02:14	43752.8	0.793229	91.7231	88.05	93.97	88.72
2019-10-14 19:02:14	43752.8	0.793229	91.3649	87.68	93.61	88.37
2019-10-14 19:02:14	43752.8	0.793229	92.3967	88.95	94.53	89.53
2019-10-14 19:02:14	43752.8	0.793229	91.5818	88.18	93.77	88.59
2019-10-14 19:02:14	43752.8	0.793229	91.5405	87.82	93.78	88.57
2019-10-14 19:02:14	43752.8	0.793229	92.2398	88.61	94.39	89.41
2019-10-14 19:02:14	43752.8	0.793229	91.3908	87.64	93.56	88.57
2019-10-14 19:02:14	43752.8	0.793229	92.3166	88.82	94.49	89.39
2019-10-14 19:02:14	43752.8	0.793229	91.9908	88.37	94.16	89.12
2019-10-14 19:02:14	43752.8	0.793229	91.5578	87.87	93.81	88.55
2019-10-14 19:02:14	43752.8	0.793229	92.1242	88.6	94.2	89.4
2019-10-14 19:02:14	43752.8	0.793229	91.9953	88.34	94.25	88.97
2019-10-14 19:02:14	43752.8	0.793229	92.1375	88.62	94.29	89.26
2019-10-14 19:02:14	43752.8	0.793229	91.9546	88.36	94.08	89.16
2019-10-14 19:02:14	43752.8	0.793229	92.1857	88.55	94.34	89.35
2019-10-14 19:02:14	43752.8	0.793229	92.7781	89.27	94.98	89.8
2019-10-14 19:02:14	43752.8	0.793229	91.1602	87.46	93.36	88.26
2019-10-14 19:02:14	43752.8	0.793229	92.0462	88.36	94.18	89.27
2019-10-14 19:02:14	43752.8	0.793229	92.2284	88.67	94.42	89.29
2019-10-14 19:02:14	43752.8	0.793229	91.498	87.83	93.67	88.64
2019-10-14 19:02:14	43752.8	0.793229	92.4808	88.68	94.67	89.64
2019-10-14 19:02:14	43752.8	0.793229	92.0895	88.49	94.31	89.11
2019-10-14 19:02:14	43752.8	0.793229	92.0088	88.35	94.21	89.09
2019-10-14 19:02:14	43752.8	0.793229	91.5378	87.82	93.75	88.62
2019-10-14 19:02:14	43752.8	0.793229	91.366	87.97	93.54	88.4
2019-10-14 19:02:14	43752.8	0.793229	91.7227	87.94	93.95	88.8
2019-10-14 19:02:14	43752.8	0.793229	91.9173	88.22	94.11	89.03
2019-10-14 19:02:14	43752.8	0.793229	91.1485	87.46	93.34	88.26
2019-10-14 19:02:14	43752.8	0.793229	92.7368	89.03	94.88	89.95
2019-10-14 19:02:14	43752.8	0.793229	91.522	88.02	93.74	88.51
2019-10-14 19:02:14	43752.8	0.793229	91.7389	88.16	93.95	88.77
2019-10-14 19:02:14	43752.8	0.793229	91.4185	87.92	93.68	88.32
2019-10-14 19:02:14	43752.8	0.793229	92.6082	88.99	94.74	89.81
2019-10-14 19:02:14	43752.8	0.793229	91.4766	87.75	93.7	88.54
2019-10-14 19:02:14	43752.8	0.793229	91.1727	87.49	93.35	88.31
2019-10-14 19:02:14	43752.8	0.793229	92.2309	88.61	94.39	89.38
2019-10-14 19:02:14	43752.8	0.793229	91.326	87.62	93.54	88.4
2019-10-14 19:02:14	43752.8	0.793229	92.0079	88.29	94.21	89.11
2019-10-14 19:02:14	43752.8	0.793229	92.1245	88.51	94.32	89.2
2019-10-14 19:02:14	43752.8	0.793229	91.6435	88.08	93.91	88.56
2019-10-14 19:02:14	43752.8	0.793229	91.0971	87.39	93.48	87.84
2019-10-14 19:32:15	43752.8	0.814063	92.1017	88.57	94.3	89.14
2019-10-14 19:32:15	43752.8	0.814063	92.0806	88.54	94.28	89.12
2019-10-14 19:32:15	43752.8	0.814063	90.662	87.08	92.86	87.72
2019-10-14 19:32:15	43752.8	0.814063	92.3966	88.9	94.57	89.47
2019-10-14 19:32:15	43752.8	0.814063	90.9128	87.26	93.12	87.98
2019-10-14 19:32:15	43752.8	0.814063	91.9701	88.34	94.1	89.18
2019-10-14 19:32:15	43752.8	0.814063	92.3167	88.74	94.46	89.48
2019-10-14 19:32:15	43752.8	0.814063	90.6284	87.09	92.76	87.8
2019-10-14 19:32:15	43752.8	0.814063	91.3619	87.85	93.48	88.55
2019-10-14 19:32:15	43752.8	0.814063	92.2132	88.55	94.29	89.54
2019-10-14 19:32:15	43752.8	0.814063	91.9734	88.32	94.13	89.14
2019-10-14 19:32:15	43752.8	0.814063	91.7842	88.29	93.9	88.97
2019-10-14 19:32:15	43752.8	0.814063	92.4067	88.96	94.54	89.54
2019-10-14 19:32:15	43752.8	0.814063	91.9264	88.32	94.06	89.12
2019-10-14 19:32:15	43752.8	0.814063	92.1948	88.61	94.41	89.22
2019-10-14 19:32:15	43752.8	0.814063	91.9166	88.34	94.07	89.06
2019-10-14 19:32:15	43752.8	0.814063	91.7546	88.24	93.9	88.89
2019-10-14 19:32:15	43752.8	0.814063	91.811	88.32	93.95	88.95
2019-10-14 19:32:15	43752.8	0.814063	91.1542	87.56	93.32	88.28
2019-10-14 19:32:15	43752.8	0.814063	92.2213	88.89	94.37	89.28
2019-10-14 19:32:15	43752.8	0.814063	91.8017	88.34	93.92	88.97
2019-10-14 19:32:15	43752.8	0.814063	91.2474	87.4	93.5	88.3
2019-10-14 19:32:15	43752.8	0.814063	91.6542	88.16	93.77	88.84
2019-10-14 19:32:15	43752.8	0.814063	91.6935	87.99	93.86	88.86
2019-10-14 19:32:15	43752.8	0.814063	91.4739	87.98	93.62	88.6
2019-10-14 19:32:15	43752.8	0.814063	91.4877	87.94	93.58	88.74
2019-10-14 19:32:15	43752.8	0.814063	91.6594	87.95	93.83	88.82
2019-10-14 19:32:15	43752.8	0.814063	91.6635	88.01	93.81	88.85
2019-10-14 19:32:15	43752.8	0.814063	92.3626	88.72	94.43	89.7
2019-10-14 19:32:15	43752.8	0.814063	91.5945	87.9	93.78	88.72
2019-10-14 19:32:15	43752.8	0.814063	92.1267	88.6	94.25	89.31
2019-10-14 19:32:15	43752.8	0.814063	92.3876	89.08	94.54	89.43
2019-10-14 19:32:15	43752.8	0.814063	91.623	87.91	93.74	88.89
2019-10-14 19:32:15	43752.8	0.814063	91.8948	88.43	94	89.09
2019-10-14 19:32:15	43752.8	0.814063	92.0944	88.89	94.22	89.15
2019-10-14 19:32:15	43752.8	0.814063	91.7368	88.19	93.91	88.83
2019-10-14 19:32:15	43752.8	0.814063	91.4092	88.03	93.5	88.6
2019-10-14 19:32:15	43752.8	0.814063	91.4	87.88	93.59	88.45
2019-10-14 19:32:15	43752.8	0.814063	91.8781	88.44	93.99	89.05
2019-10-14 19:32:15	43752.8	0.814063	92.4376	88.9	94.64	89.47
2019-10-14 19:32:15	43752.8	0.814063	91.4925	87.88	93.61	88.72
2019-10-14 19:32:15	43752.8	0.814063	91.6676	88.15	93.81	88.81
2019-10-14 19:32:15	43752.8	0.814063	92.1223	88.41	94.3	89.27
2019-10-14 19:32:15	43752.8	0.814063	91.4627	87.75	93.6	88.69
2019-10-14 19:32:15	43752.8	0.814063	91.8768	88.3	94.01	89.06
2019-10-14 19:32:15	43752.8	0.814063	92.635	89.2	94.76	89.78
2019-10-14 19:32:15	43752.8	0.814063	91.4703	88.03	93.65	88.51
2019-10-14 20:02:15	43752.8	0.834896	90.648	87.39	92.74	87.79
2019-10-14 20:02:15	43752.8	0.834896	91.0205	87.86	93.11	88.13
2019-10-14 20:02:14	43752.8	0.834896	90.9435	87.66	93.14	87.89
2019-10-14 20:02:14	43752.8	0.834896	90.7747	87.73	92.91	87.75
2019-10-14 20:02:14	43752.8	0.834896	90.4221	87.28	92.57	87.41
2019-10-14 20:02:14	43752.8	0.834896	91.216	87.82	93.39	88.25
2019-10-14 20:02:14	43752.8	0.834896	90.7227	87.55	92.78	87.9
2019-10-14 20:02:14	43752.8	0.834896	91.0937	87.81	93.27	88.08
2019-10-14 20:02:14	43752.8	0.834896	91.1936	87.97	93.46	87.98
2019-10-14 20:02:14	43752.8	0.834896	90.7917	87.69	92.85	87.94
2019-10-14 20:02:14	43752.8	0.834896	90.7802	87.55	92.98	87.7
2019-10-14 20:02:14	43752.8	0.834896	90.8054	87.48	92.95	87.87
2019-10-14 20:02:14	43752.8	0.834896	90.9597	88.07	92.95	88.16
2019-10-14 20:02:14	43752.8	0.834896	90.6716	87.6	92.78	87.71
2019-10-14 20:02:14	43752.8	0.834896	90.625	87.3	92.81	87.61
2019-10-14 20:02:14	43752.8	0.834896	91.0166	87.65	93.18	88.06
2019-10-14 20:02:14	43752.8	0.834896	90.7213	87.8	92.79	87.78
2019-10-14 20:02:14	43752.8	0.834896	91.1492	87.9	93.24	88.29
2019-10-14 20:02:14	43752.8	0.834896	91.0189	87.77	93.13	88.12
2019-10-14 20:02:14	43752.8	0.834896	90.5848	87.55	92.81	87.38
2019-10-14 20:02:14	43752.8	0.834896	91.1463	87.8	93.27	88.26
2019-10-14 20:02:14	43752.8	0.834896	91.1175	87.84	93.32	88.05
2019-10-14 20:02:14	43752.8	0.834896	91.8113	88.62	94.06	88.62
2019-10-14 20:02:14	43752.8	0.834896	90.6169	87.3	92.73	87.74
2019-10-14 20:02:14	43752.8	0.834896	90.8923	87.54	93.01	88.02
2019-10-14 20:02:14	43752.8	0.834896	91.8784	89.56	94.2	88.21
2019-10-14 20:02:14	43752.8	0.834896	91.1749	88.03	93.34	88.13
2019-10-14 20:02:14	43752.8	0.834896	90.7144	87.56	92.82	87.79
2019-10-14 20:02:14	43752.8	0.834896	90.6972	87.39	92.89	87.66
2019-10-14 20:02:14	43752.8	0.834896	90.7638	87.53	92.91	87.79
2019-10-14 20:02:14	43752.8	0.834896	92.9876	91.13	94.48	90.77
2019-10-14 20:02:14	43752.8	0.834896	90.5999	87.29	92.81	87.53
2019-10-14 20:02:14	43752.8	0.834896	90.714	87.44	92.96	87.56
2019-10-14 20:02:14	43752.8	0.834896	90.8887	88.05	92.94	87.95
2019-10-14 20:02:14	43752.8	0.834896	91.2277	87.95	93.41	88.2
2019-10-14 20:02:14	43752.8	0.834896	91.3154	87.96	93.42	88.47
2019-10-14 20:02:14	43752.8	0.834896	91.4592	88.32	93.6	88.46
2019-10-14 20:02:14	43752.8	0.834896	91.3698	88.26	93.5	88.38
2019-10-14 20:02:14	43752.8	0.834896	91.0425	87.81	93.3	87.85
2019-10-14 20:02:14	43752.8	0.834896	90.5282	87.38	92.66	87.55
2019-10-14 20:02:14	43752.8	0.834896	91.6263	88.48	93.93	88.31
2019-10-14 20:02:14	43752.8	0.834896	91.001	87.7	93.22	87.91
2019-10-14 20:02:14	43752.8	0.834896	90.6109	87.57	92.82	87.44
2019-10-14 20:02:14	43752.8	0.834896	90.6411	87.23	92.79	87.73
2019-10-14 20:02:14	43752.8	0.834896	90.6713	87.5	92.85	87.61
2019-10-14 20:02:14	43752.8	0.834896	90.9893	87.62	93.18	87.98
2019-10-14 20:02:14	43752.8	0.834896	91.3139	88.28	93.36	88.46
2019-10-14 20:32:15	43752.9	0.855729	88.7661	85.69	91	85.56
2019-10-14 20:32:15	43752.9	0.855729	88.7866	85.69	91.04	85.55
2019-10-14 20:32:14	43752.9	0.855729	88.8452	85.84	91.08	85.61
2019-10-14 20:32:14	43752.9	0.855729	89.5107	86.7	91.69	86.31
2019-10-14 20:32:14	43752.9	0.855729	88.6543	85.75	90.92	85.32
2019-10-14 20:32:14	43752.9	0.855729	89.0537	86.06	91.26	85.87
2019-10-14 20:32:14	43752.9	0.855729	88.7306	85.72	91.01	85.41
2019-10-14 20:32:14	43752.9	0.855729	88.8508	85.81	91.07	85.66
2019-10-14 20:32:14	43752.9	0.855729	89.1501	86.36	91.32	85.96
2019-10-14 20:32:14	43752.9	0.855729	89.4005	86.43	91.56	86.3
2019-10-14 20:32:14	43752.9	0.855729	89.6649	86.81	91.86	86.45
2019-10-14 20:32:14	43752.9	0.855729	88.7595	85.71	91	85.53
2019-10-14 20:32:14	43752.9	0.855729	89.1188	85.98	91.3	86.04
2019-10-14 20:32:14	43752.9	0.855729	89.3632	86.54	91.48	86.29
2019-10-14 20:32:14	43752.9	0.855729	88.6968	85.68	90.95	85.43
2019-10-14 20:32:14	43752.9	0.855729	88.8738	85.83	91.09	85.69
2019-10-14 20:32:14	43752.9	0.855729	89.473	86.78	91.6	86.33
2019-10-14 20:32:14	43752.9	0.855729	88.7961	85.72	91.03	85.59
2019-10-14 20:32:14	43752.9	0.855729	88.9215	85.99	91.14	85.69
2019-10-14 20:32:14	43752.9	0.855729	89.5649	86.74	91.8	86.26
2019-10-14 20:32:14	43752.9	0.855729	88.9343	85.87	91.17	85.72
2019-10-14 20:32:14	43752.9	0.855729	89.2936	86.3	91.51	86.09
2019-10-14 20:32:14	43752.9	0.855729	89.1802	86.21	91.37	86.02
2019-10-14 20:32:14	43752.9	0.855729	88.5917	85.56	90.83	85.36
2019-10-14 20:32:14	43752.9	0.855729	88.7831	85.87	91.06	85.43
2019-10-14 20:32:14	43752.9	0.855729	89.2478	86.23	91.41	86.16
2019-10-14 20:32:14	43752.9	0.855729	89.3405	86.35	91.57	86.11
2019-10-14 20:32:14	43752.9	0.855729	89.2948	86.08	91.55	86.1
2019-10-14 20:32:14	43752.9	0.855729	88.8679	85.88	91.06	85.71
2019-10-14 20:32:14	43752.9	0.855729	89.6002	86.53	91.84	86.38
2019-10-14 20:32:14	43752.9	0.855729	89.1472	86.23	91.32	86
2019-10-14 20:32:14	43752.9	0.855729	88.5124	85.41	90.78	85.25
2019-10-14 20:32:14	43752.9	0.855729	88.7843	85.85	91.01	85.54
2019-10-14 20:32:14	43752.9	0.855729	89.4148	86.64	91.63	86.13
2019-10-14 20:32:14	43752.9	0.855729	89.2616	86.2	91.47	86.1
2019-10-14 20:32:14	43752.9	0.855729	89.3697	86.45	91.58	86.15
2019-10-14 20:32:14	43752.9	0.855729	88.8453	85.69	91.14	85.55
2019-10-14 20:32:14	43752.9	0.855729	89.4686	86.41	91.68	86.3
2019-10-14 20:32:14	43752.9	0.855729	89.0707	85.9	91.31	85.89
2019-10-14 20:32:14	43752.9	0.855729	88.6678	85.66	90.93	85.38
2019-10-14 20:32:14	43752.9	0.855729	89.2517	86.32	91.45	86.06
2019-10-14 20:32:14	43752.9	0.855729	88.8575	85.67	91.18	85.52
2019-10-14 20:32:14	43752.9	0.855729	89.0658	85.96	91.29	85.89
2019-10-14 20:32:14	43752.9	0.855729	88.7778	85.87	91	85.53
2019-10-14 20:32:14	43752.9	0.855729	88.7954	85.87	91.03	85.53
2019-10-14 20:32:14	43752.9	0.855729	88.8584	85.67	91.1	85.68
2019-10-14 20:32:14	43752.9	0.855729	89.5474	86.53	91.75	86.38
2019-10-14 21:02:15	43752.9	0.876563	83.1842	80.07	85.98	78.89
2019-10-14 21:02:15	43752.9	0.876563	86.6217	83.62	88.9	83.3
2019-10-14 21:02:15	43752.9	0.876563	83.8157	80.41	86.72	79.42
2019-10-14 21:02:15	43752.9	0.876563	84.1595	80.62	86.99	79.96
2019-10-14 21:02:15	43752.9	0.876563	83.0353	79.87	85.76	78.9
2019-10-14 21:02:15	43752.9	0.876563	83.0035	79.73	85.83	78.71
2019-10-14 21:02:15	43752.9	0.876563	86.9797	83.98	89.44	83.3
2019-10-14 21:02:15	43752.9	0.876563	87.0242	84.06	89.22	83.85
2019-10-14 21:02:15	43752.9	0.876563	88.1513	85.58	90.33	84.86
2019-10-14 21:02:15	43752.9	0.876563	84.606	81.46	87.2	80.72
2019-10-14 21:02:15	43752.9	0.876563	87.9162	84.98	90.24	84.48
2019-10-14 21:02:15	43752.9	0.876563	83.2612	79.81	86.06	79.09
2019-10-14 21:02:15	43752.9	0.876563	82.443	79.16	85.21	78.27
2019-10-14 21:02:15	43752.9	0.876563	87.6453	84.6	89.99	84.21
2019-10-14 21:02:15	43752.9	0.876563	82.9655	79.55	85.78	78.75
2019-10-14 21:02:15	43752.9	0.876563	87.3334	84.33	89.73	83.78
2019-10-14 21:02:15	43752.9	0.876563	87.108	84.2	89.31	83.9
2019-10-14 21:02:15	43752.9	0.876563	83.6963	80.39	86.5	79.46
2019-10-14 21:02:15	43752.9	0.876563	88.2065	85.18	90.38	85.1
2019-10-14 21:02:15	43752.9	0.876563	88.0435	85.35	90.4	84.45
2019-10-14 21:02:15	43752.9	0.876563	88.0501	85.12	90.39	84.58
2019-10-14 21:02:15	43752.9	0.876563	82.5329	79.19	85.5	77.99
2019-10-14 21:02:15	43752.9	0.876563	88.0214	85.35	90.23	84.71
2019-10-14 21:02:15	43752.9	0.876563	83.2395	79.92	86.18	78.74
2019-10-14 21:02:15	43752.9	0.876563	82.323	78.8	85.31	77.81
2019-10-14 21:02:15	43752.9	0.876563	82.7527	79.47	85.55	78.52
2019-10-14 21:02:15	43752.9	0.876563	87.4614	84.58	89.93	83.72
2019-10-14 21:02:15	43752.9	0.876563	88.3133	85.76	90.51	84.98
2019-10-14 21:02:15	43752.9	0.876563	82.8926	79.6	85.86	78.33
2019-10-14 21:02:15	43752.9	0.876563	82.452	79.05	85.42	77.93
2019-10-14 21:02:15	43752.9	0.876563	88.0257	85.35	90.12	84.94
2019-10-14 21:02:15	43752.9	0.876563	87.3973	84.32	89.79	83.88
2019-10-14 21:02:15	43752.9	0.876563	88.1759	85.45	90.54	84.58
2019-10-14 21:02:15	43752.9	0.876563	87.4054	84.41	89.72	84.01
2019-10-14 21:02:15	43752.9	0.876563	82.4461	78.92	85.42	77.96
2019-10-14 21:02:15	43752.9	0.876563	82.3446	78.94	85.35	77.75
2019-10-14 21:02:15	43752.9	0.876563	83.0548	79.65	86.04	78.5
2019-10-14 21:02:15	43752.9	0.876563	87.952	85.14	90.28	84.46
2019-10-14 21:02:15	43752.9	0.876563	87.0209	84.06	89.25	83.78
2019-10-14 21:02:15	43752.9	0.876563	87.1963	84.37	89.3	84.15
2019-10-14 21:02:15	43752.9	0.876563	83.1378	79.97	85.9	78.93
2019-10-14 21:02:15	43752.9	0.876563	83.0325	79.53	86	78.55
2019-10-14 21:02:15	43752.9	0.876563	84.8714	81.82	87.47	80.94
2019-10-14 21:02:15	43752.9	0.876563	87.7965	84.95	90.21	84.15
2019-10-14 21:02:15	43752.9	0.876563	88.5712	85.93	90.84	85.13
2019-10-14 21:02:15	43752.9	0.876563	84.0942	80.59	86.91	79.91
2019-10-14 21:02:15	43752.9	0.876563	82.8471	79.36	85.87	78.25
2019-10-14 21:32:15	43752.9	0.897396	83.3362	80.8	86.01	79.06
2019-10-14 21:32:15	43752.9	0.897396	82.8595	80.02	85.64	78.49
2019-10-14 21:32:14	43752.9	0.897396	84.0537	81.31	86.94	79.44
2019-10-14 21:32:14	43752.9	0.897396	83.4885	80.75	86.31	79
2019-10-14 21:32:14	43752.9	0.897396	82.8256	79.9	85.84	78.03
2019-10-14 21:32:14	43752.9	0.897396	83.3371	80.46	86.19	78.84
2019-10-14 21:32:14	43752.9	0.897396	84.5505	81.97	87.23	80.28
2019-10-14 21:32:14	43752.9	0.897396	83.9813	81.3	86.9	79.28
2019-10-14 21:32:14	43752.9	0.897396	83.3756	80.62	86.26	78.77
2019-10-14 21:32:14	43752.9	0.897396	83.4108	80.72	86.27	78.83
2019-10-14 21:32:14	43752.9	0.897396	83.1442	80.51	85.78	78.98
2019-10-14 21:32:14	43752.9	0.897396	82.5736	79.83	85.47	77.94
2019-10-14 21:32:14	43752.9	0.897396	83.4866	80.61	86.39	78.89
2019-10-14 21:32:14	43752.9	0.897396	83.542	80.76	86.44	78.92
2019-10-14 21:32:14	43752.9	0.897396	83.4988	80.85	86.15	79.31
2019-10-14 21:32:14	43752.9	0.897396	83.8975	81.21	86.79	79.25
2019-10-14 21:32:14	43752.9	0.897396	83.5486	80.77	86.49	78.84
2019-10-14 21:32:14	43752.9	0.897396	83.164	80.27	86.09	78.53
2019-10-14 21:32:14	43752.9	0.897396	83.8562	81	86.73	79.31
2019-10-14 21:32:14	43752.9	0.897396	83.0504	80.36	85.68	78.92
2019-10-14 21:32:14	43752.9	0.897396	83.2329	80.28	86.18	78.58
2019-10-14 21:32:14	43752.9	0.897396	83.3984	80.6	86.15	79.07
2019-10-14 21:32:14	43752.9	0.897396	83.5403	80.59	86.46	78.94
2019-10-14 21:32:14	43752.9	0.897396	84.9573	82.09	87.63	80.81
2019-10-14 21:32:14	43752.9	0.897396	86.2433	85.38	87.84	83.44
2019-10-14 21:32:14	43752.9	0.897396	83.4929	80.61	86.36	78.97
2019-10-14 21:32:14	43752.9	0.897396	82.8719	80.13	85.66	78.45
2019-10-14 21:32:14	43752.9	0.897396	84.4178	81.69	87.14	80.12
2019-10-14 21:32:14	43752.9	0.897396	75.4985	71.15	79.21	69.88
2019-10-14 21:32:14	43752.9	0.897396	82.9398	80.4	85.56	78.77
2019-10-14 21:32:14	43752.9	0.897396	83.5544	80.64	86.51	78.87
2019-10-14 21:32:14	43752.9	0.897396	83.1416	80.47	85.87	78.81
2019-10-14 21:32:14	43752.9	0.897396	85.1945	83.07	87.94	80.62
2019-10-14 21:32:14	43752.9	0.897396	83.4028	80.62	86.23	78.92
2019-10-14 21:32:14	43752.9	0.897396	82.9954	80.2	85.75	78.66
2019-10-14 21:32:14	43752.9	0.897396	84.4121	81.87	87.09	80.13
2019-10-14 21:32:14	43752.9	0.897396	83.9405	80.99	86.84	79.38
2019-10-14 21:32:14	43752.9	0.897396	83.5353	80.87	86.3	79.13
2019-10-14 21:32:14	43752.9	0.897396	83.0699	80.46	85.76	78.79
2019-10-14 21:32:14	43752.9	0.897396	85.344	82.66	88.02	81.12
2019-10-14 21:32:14	43752.9	0.897396	83.4633	80.74	86.33	78.88
2019-10-14 21:32:14	43752.9	0.897396	83.3256	80.68	86	79.09
2019-10-14 21:32:14	43752.9	0.897396	83.5077	80.68	86.29	79.13
2019-10-14 21:32:14	43752.9	0.897396	81.813	79.06	84.66	77.28
2019-10-14 21:32:14	43752.9	0.897396	83.7894	82.64	86.24	79.42
2019-10-14 21:32:14	43752.9	0.897396	84.1228	81.57	86.9	79.65
2019-10-14 21:32:14	43752.9	0.897396	83.2836	80.71	86.05	78.84
2019-10-14 22:02:15	43752.9	0.918229	81.0587	78.25	83.95	76.46
2019-10-14 22:02:15	43752.9	0.918229	80.5728	77.88	83.52	75.82
2019-10-14 22:02:14	43752.9	0.918229	81.1593	78.29	84.18	76.33
2019-10-14 22:02:14	43752.9	0.918229	81.2546	78.47	84.19	76.56
2019-10-14 22:02:14	43752.9	0.918229	80.4128	77.42	83.5	75.5
2019-10-14 22:02:14	43752.9	0.918229	80.7549	77.95	83.72	76.01
2019-10-14 22:02:14	43752.9	0.918229	80.9345	78.05	83.92	76.18
2019-10-14 22:02:14	43752.9	0.918229	80.9568	78.45	83.88	76.18
2019-10-14 22:02:14	43752.9	0.918229	80.9297	78.26	83.83	76.26
2019-10-14 22:02:14	43752.9	0.918229	81.4089	78.63	84.32	76.76
2019-10-14 22:02:14	43752.9	0.918229	80.5688	77.63	83.46	76.02
2019-10-14 22:02:14	43752.9	0.918229	80.9069	78.16	83.77	76.34
2019-10-14 22:02:14	43752.9	0.918229	81.0635	78.43	84.03	76.25
2019-10-14 22:02:14	43752.9	0.918229	81.2015	78.29	84.15	76.53
2019-10-14 22:02:14	43752.9	0.918229	80.7315	78.07	83.57	76.18
2019-10-14 22:02:14	43752.9	0.918229	81.318	78.56	84.25	76.62
2019-10-14 22:02:14	43752.9	0.918229	81.279	78.5	84.18	76.65
2019-10-14 22:02:14	43752.9	0.918229	81.1926	78.6	84.11	76.46
2019-10-14 22:02:14	43752.9	0.918229	80.9522	78.07	83.88	76.31
2019-10-14 22:02:14	43752.9	0.918229	80.6373	77.72	83.6	75.94
2019-10-14 22:02:14	43752.9	0.918229	80.4157	77.82	83.32	75.71
2019-10-14 22:02:14	43752.9	0.918229	80.9751	78.38	83.94	76.15
2019-10-14 22:02:14	43752.9	0.918229	81.6291	78.96	84.58	76.86
2019-10-14 22:02:14	43752.9	0.918229	80.8436	78.03	83.83	76.06
2019-10-14 22:02:14	43752.9	0.918229	80.9925	78.19	83.91	76.34
2019-10-14 22:02:14	43752.9	0.918229	81.2039	78.41	84.1	76.59
2019-10-14 22:02:14	43752.9	0.918229	80.9891	78.03	83.91	76.39
2019-10-14 22:02:14	43752.9	0.918229	81.2502	78.56	84.17	76.55
2019-10-14 22:02:14	43752.9	0.918229	81.0091	78.41	83.88	76.37
2019-10-14 22:02:14	43752.9	0.918229	80.7918	78.2	83.78	75.92
2019-10-14 22:02:14	43752.9	0.918229	81.0433	78.15	84.04	76.27
2019-10-14 22:02:14	43752.9	0.918229	80.5037	77.48	83.47	75.84
2019-10-14 22:02:14	43752.9	0.918229	80.8816	78.36	83.81	76.1
2019-10-14 22:02:14	43752.9	0.918229	81.4938	78.7	84.4	76.86
2019-10-14 22:02:14	43752.9	0.918229	81.0391	78.37	83.99	76.27
2019-10-14 22:02:14	43752.9	0.918229	81.0715	78.5	84.03	76.25
2019-10-14 22:02:14	43752.9	0.918229	81.0454	78.24	83.97	76.38
2019-10-14 22:02:14	43752.9	0.918229	80.6206	77.8	83.51	76.03
2019-10-14 22:02:14	43752.9	0.918229	81.1104	78.24	84.04	76.46
2019-10-14 22:02:14	43752.9	0.918229	80.9098	78.25	83.9	76.06
2019-10-14 22:02:14	43752.9	0.918229	80.9237	78.03	83.88	76.23
2019-10-14 22:02:14	43752.9	0.918229	81.0265	78.44	83.96	76.26
2019-10-14 22:02:14	43752.9	0.918229	81.0246	78.42	83.93	76.32
2019-10-14 22:02:14	43752.9	0.918229	80.8356	77.98	83.76	76.19
2019-10-14 22:02:14	43752.9	0.918229	80.7583	77.8	83.75	76.02
2019-10-14 22:02:14	43752.9	0.918229	81.228	78.47	84.16	76.53
2019-10-14 22:02:14	43752.9	0.918229	80.414	77.75	83.29	75.79
2019-10-14 22:32:15	43752.9	0.939063	81.6821	78.75	84.64	77
2019-10-14 22:32:15	43752.9	0.939063	81.76	79.13	84.77	76.86
2019-10-14 22:32:15	43752.9	0.939063	82.0789	79.35	84.97	77.45
2019-10-14 22:32:15	43752.9	0.939063	82.2405	79.5	85.15	77.58
2019-10-14 22:32:15	43752.9	0.939063	81.3619	78.31	84.45	76.47
2019-10-14 22:32:15	43752.9	0.939063	81.4299	78.79	84.35	76.71
2019-10-14 22:32:15	43752.9	0.939063	81.5845	78.85	84.5	76.91
2019-10-14 22:32:15	43752.9	0.939063	82.5659	79.65	85.39	78.14
2019-10-14 22:32:15	43752.9	0.939063	81.4566	78.77	84.43	76.65
2019-10-14 22:32:15	43752.9	0.939063	82.731	79.82	85.73	77.96
2019-10-14 22:32:15	43752.9	0.939063	82.2676	79.58	85.15	77.64
2019-10-14 22:32:15	43752.9	0.939063	82.1593	79.49	85.09	77.43
2019-10-14 22:32:15	43752.9	0.939063	82.886	80.04	85.88	78.1
2019-10-14 22:32:15	43752.9	0.939063	82.5084	79.83	85.42	77.82
2019-10-14 22:32:15	43752.9	0.939063	82.2704	79.37	85.16	77.71
2019-10-14 22:32:15	43752.9	0.939063	81.8987	79.2	84.85	77.14
2019-10-14 22:32:15	43752.9	0.939063	82.3308	79.67	85.23	77.66
2019-10-14 22:32:15	43752.9	0.939063	82.0758	79.27	84.96	77.49
2019-10-14 22:32:15	43752.9	0.939063	82.4142	79.98	85.22	77.84
2019-10-14 22:32:15	43752.9	0.939063	82.3602	79.28	85.29	77.79
2019-10-14 22:32:15	43752.9	0.939063	82.1967	79.58	85.08	77.54
2019-10-14 22:32:15	43752.9	0.939063	81.3151	78.43	84.25	76.66
2019-10-14 22:32:15	43752.9	0.939063	82.0566	79.26	84.97	77.41
2019-10-14 22:32:15	43752.9	0.939063	82.0617	79.25	84.95	77.47
2019-10-14 22:32:15	43752.9	0.939063	81.9956	79.31	84.79	77.54
2019-10-14 22:32:15	43752.9	0.939063	82.8383	80.36	85.67	78.23
2019-10-14 22:32:15	43752.9	0.939063	81.5093	78.71	84.45	76.81
2019-10-14 22:32:15	43752.9	0.939063	81.9716	79.29	84.86	77.33
2019-10-14 22:32:15	43752.9	0.939063	81.8827	79.29	84.79	77.17
2019-10-14 22:32:15	43752.9	0.939063	82.4983	79.63	85.35	78
2019-10-14 22:32:15	43752.9	0.939063	83.0669	80.43	85.99	78.34
2019-10-14 22:32:15	43752.9	0.939063	82.6015	79.95	85.54	77.85
2019-10-14 22:32:15	43752.9	0.939063	81.8134	79.18	84.79	76.98
2019-10-14 22:32:15	43752.9	0.939063	81.8762	78.93	84.9	77.07
2019-10-14 22:32:15	43752.9	0.939063	81.8428	78.86	84.76	77.26
2019-10-14 22:32:15	43752.9	0.939063	82.1352	79.2	85.08	77.48
2019-10-14 22:32:15	43752.9	0.939063	81.5241	78.99	84.39	76.87
2019-10-14 22:32:15	43752.9	0.939063	81.6057	78.78	84.56	76.89
2019-10-14 22:32:15	43752.9	0.939063	81.8434	79.23	84.75	77.14
2019-10-14 22:32:15	43752.9	0.939063	82.1986	79.54	85.03	77.66
2019-10-14 22:32:15	43752.9	0.939063	81.8212	78.96	84.78	77.11
2019-10-14 22:32:15	43752.9	0.939063	81.7057	79.04	84.7	76.85
2019-10-14 22:32:15	43752.9	0.939063	83.0271	80.34	85.96	78.3
2019-10-14 22:32:15	43752.9	0.939063	82.2274	79.39	85.2	77.48
2019-10-14 22:32:15	43752.9	0.939063	81.8914	79.42	84.81	77.11
2019-10-14 22:32:15	43752.9	0.939063	82.0361	79.34	84.95	77.35
2019-10-14 22:32:15	43752.9	0.939063	81.854	79.01	84.76	77.24
2019-10-14 23:02:15	43753	0.959896	85.6796	82.62	88.34	81.63
2019-10-14 23:02:15	43753	0.959896	85.4684	82.22	88.16	81.43
2019-10-14 23:02:14	43753	0.959896	84.218	81.24	87.04	79.82
2019-10-14 23:02:14	43753	0.959896	86.0491	83.09	88.71	81.96
2019-10-14 23:02:14	43753	0.959896	85.8616	82.98	88.58	81.63
2019-10-14 23:02:14	43753	0.959896	84.8974	82.39	87.5	80.75
2019-10-14 23:02:14	43753	0.959896	84.4361	81.36	87.21	80.17
2019-10-14 23:02:14	43753	0.959896	83.7891	80.97	86.54	79.47
2019-10-14 23:02:14	43753	0.959896	84.1375	81.51	86.84	79.84
2019-10-14 23:02:14	43753	0.959896	85.9142	83.02	88.56	81.83
2019-10-14 23:02:14	43753	0.959896	84.9495	81.94	87.59	80.92
2019-10-14 23:02:14	43753	0.959896	86.0592	83.11	88.81	81.79
2019-10-14 23:02:14	43753	0.959896	86.2536	83.4	88.83	82.29
2019-10-14 23:02:14	43753	0.959896	85.9765	82.92	88.65	81.9
2019-10-14 23:02:14	43753	0.959896	86.46	83.53	89.08	82.44
2019-10-14 23:02:14	43753	0.959896	84.6806	82.05	87.37	80.41
2019-10-14 23:02:14	43753	0.959896	87.1752	84.28	89.73	83.27
2019-10-14 23:02:14	43753	0.959896	84.5552	81.75	87.23	80.38
2019-10-14 23:02:14	43753	0.959896	84.4042	81.72	87.06	80.22
2019-10-14 23:02:14	43753	0.959896	86.6034	83.59	89.16	82.74
2019-10-14 23:02:14	43753	0.959896	84.7505	82.19	87.37	80.59
2019-10-14 23:02:14	43753	0.959896	85.7213	82.62	88.35	81.75
2019-10-14 23:02:14	43753	0.959896	85.232	82.69	87.92	80.93
2019-10-14 23:02:14	43753	0.959896	85.1954	82.19	87.94	80.96
2019-10-14 23:02:14	43753	0.959896	84.5259	81.88	87.17	80.35
2019-10-14 23:02:14	43753	0.959896	86.0101	83.21	88.61	81.98
2019-10-14 23:02:14	43753	0.959896	85.7581	82.55	88.35	81.9
2019-10-14 23:02:14	43753	0.959896	85.2049	82.35	87.93	80.95
2019-10-14 23:02:14	43753	0.959896	85.4156	82.76	87.99	81.38
2019-10-14 23:02:14	43753	0.959896	85.8274	82.9	88.41	81.88
2019-10-14 23:02:14	43753	0.959896	87.0169	84.08	89.54	83.19
2019-10-14 23:02:14	43753	0.959896	86.0489	83.14	88.7	81.96
2019-10-14 23:02:14	43753	0.959896	86.0465	83.09	88.67	82.03
2019-10-14 23:02:14	43753	0.959896	85.4451	82.56	88.11	81.32
2019-10-14 23:02:14	43753	0.959896	86.466	83.52	88.97	82.68
2019-10-14 23:02:14	43753	0.959896	85.3119	82.51	88.02	81.07
2019-10-14 23:02:14	43753	0.959896	84.572	81.72	87.29	80.33
2019-10-14 23:02:14	43753	0.959896	84.7841	81.9	87.54	80.48
2019-10-14 23:02:14	43753	0.959896	86.5979	83.39	89.21	82.7
2019-10-14 23:02:14	43753	0.959896	84.6945	81.71	87.46	80.41
2019-10-14 23:02:14	43753	0.959896	84.0401	81.39	86.84	79.56
2019-10-14 23:02:14	43753	0.959896	86.1741	83.25	88.79	82.16
2019-10-14 23:02:14	43753	0.959896	85.6833	82.6	88.34	81.65
2019-10-14 23:02:14	43753	0.959896	86.0752	83.07	88.84	81.8
2019-10-14 23:02:14	43753	0.959896	84.8125	82.19	87.44	80.66
2019-10-14 23:02:14	43753	0.959896	84.5227	81.74	87.36	80.02
2019-10-14 23:02:14	43753	0.959896	84.9606	81.99	87.65	80.82
2019-10-14 23:32:15	43753	0.980729	87.6243	84.72	90.16	83.76
2019-10-14 23:32:15	43753	0.980729	86.1876	83.43	88.62	82.47
2019-10-14 23:32:14	43753	0.980729	87.3562	84.83	89.87	83.39
2019-10-14 23:32:14	43753	0.980729	85.9333	83.39	88.5	81.87
2019-10-14 23:32:14	43753	0.980729	85.3614	82.57	87.95	81.35
2019-10-14 23:32:14	43753	0.980729	86.2422	83.82	88.8	82.15
2019-10-14 23:32:14	43753	0.980729	87.407	84.39	89.91	83.65
2019-10-14 23:32:14	43753	0.980729	86.6763	83.87	89.25	82.7
2019-10-14 23:32:14	43753	0.980729	86.6815	84.02	89.25	82.66
2019-10-14 23:32:14	43753	0.980729	85.3916	82.83	87.91	81.43
2019-10-14 23:32:14	43753	0.980729	86.7333	84	89.23	82.88
2019-10-14 23:32:14	43753	0.980729	86.9543	84.31	89.48	83.01
2019-10-14 23:32:14	43753	0.980729	86.8414	84.25	89.34	82.93
2019-10-14 23:32:14	43753	0.980729	85.7515	83.06	88.28	81.82
2019-10-14 23:32:14	43753	0.980729	86.9221	84.15	89.38	83.16
2019-10-14 23:32:14	43753	0.980729	86.468	83.63	89.12	82.35
2019-10-14 23:32:14	43753	0.980729	86.0056	83.32	88.54	82.06
2019-10-14 23:32:14	43753	0.980729	86.4254	83.93	89.05	82.23
2019-10-14 23:32:14	43753	0.980729	85.5734	82.88	88.2	81.45
2019-10-14 23:32:14	43753	0.980729	86.7948	84.12	89.23	83.04
2019-10-14 23:32:14	43753	0.980729	86.7931	84.17	89.36	82.76
2019-10-14 23:32:14	43753	0.980729	86.6313	83.81	89.19	82.69
2019-10-14 23:32:14	43753	0.980729	86.0141	83.22	88.62	81.97
2019-10-14 23:32:14	43753	0.980729	87.0914	84.47	89.55	83.27
2019-10-14 23:32:14	43753	0.980729	85.8605	83.14	88.44	81.84
2019-10-14 23:32:14	43753	0.980729	86.2807	83.48	88.83	82.35
2019-10-14 23:32:14	43753	0.980729	86.7556	83.97	89.33	82.77
2019-10-14 23:32:14	43753	0.980729	86.829	83.72	89.3	83.17
2019-10-14 23:32:14	43753	0.980729	86.4089	83.75	88.95	82.44
2019-10-14 23:32:14	43753	0.980729	86.4329	83.62	88.95	82.57
2019-10-14 23:32:14	43753	0.980729	86.5522	83.98	89.18	82.38
2019-10-14 23:32:14	43753	0.980729	85.8423	83	88.37	81.97
2019-10-14 23:32:14	43753	0.980729	86.7008	83.95	89.22	82.81
2019-10-14 23:32:14	43753	0.980729	86.2879	83.7	88.83	82.29
2019-10-14 23:32:14	43753	0.980729	86.61	83.83	89.16	82.67
2019-10-14 23:32:14	43753	0.980729	86.5639	83.6	89.06	82.8
2019-10-14 23:32:14	43753	0.980729	86.6457	83.68	89.24	82.69
2019-10-14 23:32:14	43753	0.980729	86.7419	83.97	89.22	82.94
2019-10-14 23:32:14	43753	0.980729	86.4818	83.71	88.97	82.66
2019-10-14 23:32:14	43753	0.980729	87.3106	84.55	89.74	83.6
2019-10-14 23:32:14	43753	0.980729	85.5496	82.46	88.17	81.59
2019-10-14 23:32:14	43753	0.980729	86.363	83.34	88.86	82.62
2019-10-14 23:32:14	43753	0.980729	85.9051	83.28	88.56	81.7
2019-10-14 23:32:14	43753	0.980729	87.1974	84.55	89.71	83.28
2019-10-14 23:32:14	43753	0.980729	86.5274	83.8	89.02	82.68
2019-10-14 23:32:14	43753	0.980729	86.9307	84.03	89.52	82.96
2019-10-14 23:32:14	43753	0.980729	86.3708	83.67	88.86	82.52
2019-10-15 00:02:15	43753	1.00156	91.0746	88.21	93.19	88.02
2019-10-15 00:02:15	43753	1.00156	90.3591	87.56	92.52	87.19
2019-10-15 00:02:15	43753	1.00156	89.5506	86.35	91.76	86.44
2019-10-15 00:02:15	43753	1.00156	88.6973	85.89	90.92	85.41
2019-10-15 00:02:15	43753	1.00156	86.929	84.08	89.39	83.19
2019-10-15 00:02:15	43753	1.00156	89.7868	86.82	92.02	86.54
2019-10-15 00:02:15	43753	1.00156	90.9234	87.59	93.15	87.83
2019-10-15 00:02:15	43753	1.00156	89.2431	86.09	91.47	86.08
2019-10-15 00:02:15	43753	1.00156	88.876	85.75	91.14	85.63
2019-10-15 00:02:15	43753	1.00156	89.3121	86.53	91.67	85.75
2019-10-15 00:02:15	43753	1.00156	90.5841	87.41	92.78	87.49
2019-10-15 00:02:15	43753	1.00156	89.5466	86.37	91.78	86.38
2019-10-15 00:02:15	43753	1.00156	90.2994	87.48	92.49	87.08
2019-10-15 00:02:15	43753	1.00156	89.571	86.96	91.63	86.53
2019-10-15 00:02:15	43753	1.00156	90.7549	87.58	92.88	87.8
2019-10-15 00:02:15	43753	1.00156	90.6269	87.68	92.79	87.51
2019-10-15 00:02:15	43753	1.00156	89.0411	86.51	91.38	85.42
2019-10-15 00:02:15	43753	1.00156	90.4507	87.51	92.64	87.28
2019-10-15 00:02:15	43753	1.00156	90.6224	87.8	92.81	87.41
2019-10-15 00:02:15	43753	1.00156	90.9147	87.84	93.01	87.98
2019-10-15 00:02:15	43753	1.00156	89.7423	86.82	91.99	86.45
2019-10-15 00:02:15	43753	1.00156	90.1617	87.12	92.3	87.13
2019-10-15 00:02:15	43753	1.00156	88.4901	85.31	90.68	85.41
2019-10-15 00:02:15	43753	1.00156	90.7344	87.82	92.89	87.62
2019-10-15 00:02:15	43753	1.00156	91.0349	88.18	93.23	87.82
2019-10-15 00:02:15	43753	1.00156	91.2852	88.76	93.35	88.2
2019-10-15 00:02:15	43753	1.00156	89.7214	86.47	91.88	86.73
2019-10-15 00:02:15	43753	1.00156	90.2046	87.22	92.43	86.98
2019-10-15 00:02:15	43753	1.00156	89.6576	86.8	91.87	86.41
2019-10-15 00:02:15	43753	1.00156	91.3653	88.42	93.4	88.5
2019-10-15 00:02:15	43753	1.00156	90.872	88.04	93	87.78
2019-10-15 00:02:15	43753	1.00156	90.3763	87.29	92.49	87.41
2019-10-15 00:02:15	43753	1.00156	89.1765	86.21	91.43	85.89
2019-10-15 00:02:15	43753	1.00156	88.8301	86.49	91.06	85.35
2019-10-15 00:02:15	43753	1.00156	89.9878	86.73	92.1	87.09
2019-10-15 00:02:15	43753	1.00156	90.6401	87.53	92.74	87.71
2019-10-15 00:02:15	43753	1.00156	90.1839	87.24	92.35	87.06
2019-10-15 00:02:15	43753	1.00156	90.8129	87.91	92.94	87.75
2019-10-15 00:02:15	43753	1.00156	90.491	87.47	92.63	87.45
2019-10-15 00:02:15	43753	1.00156	90.3184	87.28	92.49	87.22
2019-10-15 00:02:15	43753	1.00156	89.1133	86.14	91.29	85.98
2019-10-15 00:02:15	43753	1.00156	89.9905	87.13	92.21	86.73
2019-10-15 00:02:15	43753	1.00156	90.1437	87.43	92.27	87.01
2019-10-15 00:02:15	43753	1.00156	90.277	87.41	92.44	87.13
2019-10-15 00:02:15	43753	1.00156	90.9736	88.26	93.11	87.82
2019-10-15 00:02:15	43753	1.00156	89.6371	86.69	91.78	86.56
2019-10-15 00:02:15	43753	1.00156	91.612	88.7	93.72	88.59
2019-10-15 00:32:15	43753	1.0224	90.3239	87.65	92.31	87.45
2019-10-15 00:32:15	43753	1.0224	90.2963	87.57	92.36	87.29
2019-10-15 00:32:14	43753	1.0224	89.5751	86.55	91.61	86.74
2019-10-15 00:32:14	43753	1.0224	90.3992	87.89	92.31	87.61
2019-10-15 00:32:14	43753	1.0224	90.7796	88.07	92.75	87.95
2019-10-15 00:32:14	43753	1.0224	91.0965	88.8	93	88.24
2019-10-15 00:32:14	43753	1.0224	91.6486	88.95	93.54	88.97
2019-10-15 00:32:14	43753	1.0224	90.2639	87.65	92.33	87.21
2019-10-15 00:32:14	43753	1.0224	90.4203	87.58	92.33	87.76
2019-10-15 00:32:14	43753	1.0224	90.4309	87.99	92.37	87.56
2019-10-15 00:32:14	43753	1.0224	91.0688	88.8	93.07	88.01
2019-10-15 00:32:14	43753	1.0224	90.2162	87.64	92.48	86.76
2019-10-15 00:32:14	43753	1.0224	90.7629	88.29	92.75	87.81
2019-10-15 00:32:14	43753	1.0224	90.3474	87.78	92.34	87.42
2019-10-15 00:32:14	43753	1.0224	89.1904	86.32	91.32	86.11
2019-10-15 00:32:14	43753	1.0224	90.7177	88.17	92.62	87.96
2019-10-15 00:32:14	43753	1.0224	90.1047	87.47	92.16	87.08
2019-10-15 00:32:14	43753	1.0224	90.7249	88.23	92.59	88.02
2019-10-15 00:32:14	43753	1.0224	90.56	87.91	92.57	87.63
2019-10-15 00:32:14	43753	1.0224	89.3253	86.67	91.39	86.29
2019-10-15 00:32:14	43753	1.0224	91.1453	88.64	93.14	88.19
2019-10-15 00:32:14	43753	1.0224	90.9642	88.4	92.98	87.99
2019-10-15 00:32:14	43753	1.0224	91.3764	88.8	93.36	88.47
2019-10-15 00:32:14	43753	1.0224	90.4891	87.73	92.52	87.56
2019-10-15 00:32:14	43753	1.0224	90.3604	87.45	92.35	87.57
2019-10-15 00:32:14	43753	1.0224	91.0845	88.42	93.12	88.11
2019-10-15 00:32:14	43753	1.0224	90.4389	87.65	92.45	87.56
2019-10-15 00:32:14	43753	1.0224	91.3016	88.79	93.26	88.42
2019-10-15 00:32:14	43753	1.0224	90.2975	87.57	92.25	87.51
2019-10-15 00:32:14	43753	1.0224	90.3476	87.87	92.44	87.19
2019-10-15 00:32:14	43753	1.0224	90.8481	88.29	92.88	87.84
2019-10-15 00:32:14	43753	1.0224	89.206	86.25	91.34	86.15
2019-10-15 00:32:14	43753	1.0224	89.84	87.16	91.81	87
2019-10-15 00:32:14	43753	1.0224	90.6837	88.04	92.73	87.68
2019-10-15 00:32:14	43753	1.0224	90.4974	87.6	92.59	87.5
2019-10-15 00:32:14	43753	1.0224	89.33	86.42	91.35	86.48
2019-10-15 00:32:14	43753	1.0224	90.7447	87.93	92.83	87.73
2019-10-15 00:32:14	43753	1.0224	88.2946	85.53	90.37	85.28
2019-10-15 00:32:14	43753	1.0224	90.6147	87.62	92.73	87.61
2019-10-15 00:32:14	43753	1.0224	90.1839	87.33	92.2	87.32
2019-10-15 00:32:14	43753	1.0224	90.7713	88.21	92.78	87.81
2019-10-15 00:32:14	43753	1.0224	90.6017	87.81	92.63	87.69
2019-10-15 00:32:14	43753	1.0224	90.0585	87.52	91.99	87.24
2019-10-15 00:32:14	43753	1.0224	89.7633	87.07	91.87	86.66
2019-10-15 00:32:14	43753	1.0224	90.7018	88.01	92.67	87.87
2019-10-15 00:32:14	43753	1.0224	89.9209	87.33	91.93	86.97
2019-10-15 00:32:14	43753	1.0224	89.8478	87	91.88	86.95
2019-10-15 01:02:15	43753	1.04323	101.626	63.18	108.21	103.43
2019-10-15 01:02:15	43753	1.04323	101.552	62.46	108.78	102.34
2019-10-15 01:02:14	43753	1.04323	101.832	61.11	107.65	106.01
2019-10-15 01:02:14	43753	1.04323	100.578	61.37	106.75	103.48
2019-10-15 01:02:14	43753	1.04323	103.157	61.24	109.94	105.9
2019-10-15 01:02:14	43753	1.04323	101.596	62.25	107.53	105.02
2019-10-15 01:02:14	43753	1.04323	102.356	63.26	109.04	104.21
2019-10-15 01:02:14	43753	1.04323	102.264	62.81	108.07	105.98
2019-10-15 01:02:14	43753	1.04323	101.025	60.94	106.96	104.73
2019-10-15 01:02:14	43753	1.04323	100.264	59.41	106.67	103.34
2019-10-15 01:02:14	43753	1.04323	112.881	78.54	119.65	112.75
2019-10-15 01:02:14	43753	1.04323	101.027	62	107.23	103.8
2019-10-15 01:02:14	43753	1.04323	101.858	63.45	107.9	104.71
2019-10-15 01:02:14	43753	1.04323	100.375	57.75	107.04	103.62
2019-10-15 01:02:14	43753	1.04323	99.4968	58.24	106.68	101.2
2019-10-15 01:02:14	43753	1.04323	100.504	59.6	106.44	104.52
2019-10-15 01:02:14	43753	1.04323	99.5456	57.41	106.38	102.27
2019-10-15 01:02:14	43753	1.04323	101.024	60.83	106.98	104.73
2019-10-15 01:02:14	43753	1.04323	104.819	66.48	110.93	107.51
2019-10-15 01:02:14	43753	1.04323	97.5962	57.05	104.88	98.83
2019-10-15 01:02:14	43753	1.04323	101.691	62.54	107.61	105.07
2019-10-15 01:02:14	43753	1.04323	101.542	63.2	108.75	102.08
2019-10-15 01:02:14	43753	1.04323	100.344	60.81	106.41	103.58
2019-10-15 01:02:14	43753	1.04323	99.1144	56.61	105.48	102.9
2019-10-15 01:02:14	43753	1.04323	102.476	65.63	108.63	104.51
2019-10-15 01:02:14	43753	1.04323	101.163	61.8	107.41	103.98
2019-10-15 01:02:14	43753	1.04323	105.165	68.95	112.25	105.13
2019-10-15 01:02:14	43753	1.04323	101.407	60.58	107.64	104.81
2019-10-15 01:02:14	43753	1.04323	100.039	61.03	106.31	102.67
2019-10-15 01:02:14	43753	1.04323	99.7676	63.1	106.82	99.97
2019-10-15 01:02:14	43753	1.04323	101.969	65.12	107.9	104.44
2019-10-15 01:02:14	43753	1.04323	100.571	59.85	107.57	102.43
2019-10-15 01:02:14	43753	1.04323	101.29	63.09	107.42	103.89
2019-10-15 01:02:14	43753	1.04323	101.046	60.15	107.94	103.18
2019-10-15 01:02:14	43753	1.04323	102.29	62.83	109.19	103.86
2019-10-15 01:02:14	43753	1.04323	107.332	68.87	113.83	109.31
2019-10-15 01:02:14	43753	1.04323	99.5077	58.62	105.32	103.76
2019-10-15 01:02:14	43753	1.04323	98.6221	57.49	105.32	101.23
2019-10-15 01:02:14	43753	1.04323	100.961	60.03	107.89	103.04
2019-10-15 01:02:14	43753	1.04323	99.4868	57.72	106.26	102.19
2019-10-15 01:02:14	43753	1.04323	98.8587	58.23	104.83	102.7
2019-10-15 01:02:14	43753	1.04323	98.7566	59.37	105.85	99.92
2019-10-15 01:02:14	43753	1.04323	101.009	61.71	107.17	103.97
2019-10-15 01:02:14	43753	1.04323	105.766	69.27	111.99	107.53
2019-10-15 01:02:14	43753	1.04323	101.456	63.47	107.66	103.83
2019-10-15 01:02:14	43753	1.04323	102.278	61.76	108.1	106.37
2019-10-15 01:02:14	43753	1.04323	97.0765	53.72	103.64	100.8
2019-10-15 01:32:15	43753.1	1.06406	100.872	75.37	106.91	98.79
2019-10-15 01:32:15	43753.1	1.06406	98.3423	73.59	104.57	95.6
2019-10-15 01:32:15	43753.1	1.06406	98.859	74.8	105.23	95.57
2019-10-15 01:32:15	43753.1	1.06406	98.994	75.47	104.83	96.55
2019-10-15 01:32:15	43753.1	1.06406	101.251	75.63	107.78	98.25
2019-10-15 01:32:15	43753.1	1.06406	99.6187	76.37	105.76	96.47
2019-10-15 01:32:15	43753.1	1.06406	99.1834	72.61	105.39	97.18
2019-10-15 01:32:15	43753.1	1.06406	101.037	76.53	107.3	98.13
2019-10-15 01:32:15	43753.1	1.06406	98.8353	74.96	105.25	95.39
2019-10-15 01:32:15	43753.1	1.06406	99.6162	76.4	105.49	96.98
2019-10-15 01:32:15	43753.1	1.06406	100.106	72.7	106.4	98.25
2019-10-15 01:32:15	43753.1	1.06406	99.6557	74	105.72	97.58
2019-10-15 01:32:15	43753.1	1.06406	100.029	76.74	105.97	97.29
2019-10-15 01:32:15	43753.1	1.06406	100.024	76.96	106	97.13
2019-10-15 01:32:15	43753.1	1.06406	102.092	76.5	108.29	99.73
2019-10-15 01:32:15	43753.1	1.06406	99.4246	76.98	105.57	95.96
2019-10-15 01:32:15	43753.1	1.06406	100.483	77.36	106.53	97.47
2019-10-15 01:32:15	43753.1	1.06406	99.4553	77.39	105.42	96.2
2019-10-15 01:32:15	43753.1	1.06406	99.8417	74.21	105.94	97.69
2019-10-15 01:32:15	43753.1	1.06406	100.644	73.84	106.85	98.73
2019-10-15 01:32:15	43753.1	1.06406	100.866	78.53	106.93	97.52
2019-10-15 01:32:15	43753.1	1.06406	99.9842	75.53	106.17	97.21
2019-10-15 01:32:15	43753.1	1.06406	99.8308	76.56	105.85	96.93
2019-10-15 01:32:15	43753.1	1.06406	100.551	73.18	106.77	98.83
2019-10-15 01:32:15	43753.1	1.06406	101.703	76.11	107.81	99.52
2019-10-15 01:32:15	43753.1	1.06406	100.371	77.08	106.41	97.44
2019-10-15 01:32:15	43753.1	1.06406	101.321	76.13	107.45	98.94
2019-10-15 01:32:15	43753.1	1.06406	99.6624	71.78	105.92	98.06
2019-10-15 01:32:15	43753.1	1.06406	99.315	73.37	105.42	97.27
2019-10-15 01:32:15	43753.1	1.06406	100.667	73.6	106.89	98.82
2019-10-15 01:32:15	43753.1	1.06406	99.712	76.88	105.58	96.94
2019-10-15 01:32:15	43753.1	1.06406	101.996	78.8	107.87	99.35
2019-10-15 01:32:15	43753.1	1.06406	99.8839	74.68	105.91	97.71
2019-10-15 01:32:15	43753.1	1.06406	99.0169	74.77	105.24	96.09
2019-10-15 01:32:15	43753.1	1.06406	100.554	75.03	106.81	98.05
2019-10-15 01:32:15	43753.1	1.06406	101.27	74.46	107.46	99.39
2019-10-15 01:32:15	43753.1	1.06406	98.1543	72.81	104.31	95.78
2019-10-15 01:32:15	43753.1	1.06406	100.934	74.98	107.04	98.89
2019-10-15 01:32:15	43753.1	1.06406	99.5412	73.72	105.88	96.99
2019-10-15 01:32:15	43753.1	1.06406	99.4982	72.31	105.71	97.72
2019-10-15 01:32:15	43753.1	1.06406	99.7528	76.47	106.02	96.37
2019-10-15 01:32:15	43753.1	1.06406	99.8308	74.95	106.2	96.86
2019-10-15 01:32:15	43753.1	1.06406	100.187	76.53	106.06	97.72
2019-10-15 01:32:15	43753.1	1.06406	99.5555	73.25	105.67	97.63
2019-10-15 01:32:15	43753.1	1.06406	100.592	75.04	106.67	98.45
2019-10-15 01:32:15	43753.1	1.06406	100.477	77.8	106.73	96.89
2019-10-15 01:32:15	43753.1	1.06406	99.1757	72.46	105.35	97.29
2019-10-15 02:02:15	43753.1	1.0849	101.32	65.07	107.64	102.8
2019-10-15 02:02:15	43753.1	1.0849	102.066	65.85	108.5	103.31
2019-10-15 02:02:14	43753.1	1.0849	100.034	67.35	106.45	99.96
2019-10-15 02:02:14	43753.1	1.0849	102.466	70.94	108.04	103.6
2019-10-15 02:02:14	43753.1	1.0849	98.9388	60.69	105.21	101.28
2019-10-15 02:02:14	43753.1	1.0849	102.782	69.6	109.12	103.05
2019-10-15 02:02:14	43753.1	1.0849	101.598	65.8	107.87	103
2019-10-15 02:02:14	43753.1	1.0849	100.957	68.11	107.33	101.03
2019-10-15 02:02:14	43753.1	1.0849	101.471	66.86	107.63	102.64
2019-10-15 02:02:14	43753.1	1.0849	104.359	72.07	109.85	105.95
2019-10-15 02:02:14	43753.1	1.0849	103.566	72.13	109.47	104.02
2019-10-15 02:02:14	43753.1	1.0849	100.838	65.9	107.16	101.81
2019-10-15 02:02:14	43753.1	1.0849	103.108	69.92	109.39	103.49
2019-10-15 02:02:14	43753.1	1.0849	104.426	70.63	109.96	106.51
2019-10-15 02:02:14	43753.1	1.0849	100.639	66.36	106.89	101.5
2019-10-15 02:02:14	43753.1	1.0849	102.441	71.83	108.93	101.43
2019-10-15 02:02:14	43753.1	1.0849	100.589	63.75	106.34	103.41
2019-10-15 02:02:14	43753.1	1.0849	101.228	70.02	107.77	100.34
2019-10-15 02:02:14	43753.1	1.0849	101.549	68.82	107.92	101.58
2019-10-15 02:02:14	43753.1	1.0849	101.639	68.32	107.82	102.27
2019-10-15 02:02:14	43753.1	1.0849	102.035	70.88	108.56	101.16
2019-10-15 02:02:14	43753.1	1.0849	101.838	68.1	107.81	103.04
2019-10-15 02:02:14	43753.1	1.0849	100.659	65.04	107.07	101.72
2019-10-15 02:02:14	43753.1	1.0849	100.438	65.99	106.35	102.03
2019-10-15 02:02:14	43753.1	1.0849	101.568	69.32	107.87	101.55
2019-10-15 02:02:14	43753.1	1.0849	99.9699	65.89	106.33	100.54
2019-10-15 02:02:14	43753.1	1.0849	99.5418	63.12	105.83	101.15
2019-10-15 02:02:14	43753.1	1.0849	100.353	66.75	106.04	102.06
2019-10-15 02:02:14	43753.1	1.0849	99.649	65.77	106	100.16
2019-10-15 02:02:14	43753.1	1.0849	102.744	70.11	108.88	103.2
2019-10-15 02:02:14	43753.1	1.0849	100.897	68.42	107.37	100.63
2019-10-15 02:02:14	43753.1	1.0849	99.2765	62.72	105.68	100.71
2019-10-15 02:02:14	43753.1	1.0849	99.6988	65.21	105.97	100.6
2019-10-15 02:02:14	43753.1	1.0849	98.9717	61.55	104.93	101.61
2019-10-15 02:02:14	43753.1	1.0849	100.082	63.26	106.54	101.51
2019-10-15 02:02:14	43753.1	1.0849	100.134	66.59	105.74	101.98
2019-10-15 02:02:14	43753.1	1.0849	100.279	67.14	106.72	100.33
2019-10-15 02:02:14	43753.1	1.0849	102.335	69.74	107.96	103.78
2019-10-15 02:02:14	43753.1	1.0849	100.055	64.55	106.4	101.2
2019-10-15 02:02:14	43753.1	1.0849	99.7265	63.16	106.03	101.36
2019-10-15 02:02:14	43753.1	1.0849	100.457	64.14	106.9	101.72
2019-10-15 02:02:14	43753.1	1.0849	103.507	68.75	109.87	104.33
2019-10-15 02:02:14	43753.1	1.0849	102.469	69.62	108.39	103.43
2019-10-15 02:02:14	43753.1	1.0849	100.153	64.76	106.42	101.41
2019-10-15 02:02:14	43753.1	1.0849	100.794	67.87	107.17	100.89
2019-10-15 02:02:14	43753.1	1.0849	98.394	66.35	104.95	97.8
2019-10-15 02:02:14	43753.1	1.0849	101.08	68.69	106.86	102.14
2019-10-15 02:32:15	43753.1	1.10573	100.772	77.75	106.58	98.19
2019-10-15 02:32:15	43753.1	1.10573	98.2412	74.87	104	95.89
2019-10-15 02:32:14	43753.1	1.10573	99.146	75.77	105	96.61
2019-10-15 02:32:14	43753.1	1.10573	100.354	77.16	106.14	97.88
2019-10-15 02:32:14	43753.1	1.10573	100.813	75.07	107.3	97.94
2019-10-15 02:32:14	43753.1	1.10573	100.619	78.15	106.4	97.88
2019-10-15 02:32:14	43753.1	1.10573	100.501	77.37	106.31	97.96
2019-10-15 02:32:14	43753.1	1.10573	99.6656	75.84	105.5	97.34
2019-10-15 02:32:14	43753.1	1.10573	100.277	77.48	106.11	97.56
2019-10-15 02:32:14	43753.1	1.10573	100.475	77.17	106.3	97.97
2019-10-15 02:32:14	43753.1	1.10573	99.8591	77.44	105.64	97.1
2019-10-15 02:32:14	43753.1	1.10573	99.2468	75.56	105.07	96.89
2019-10-15 02:32:14	43753.1	1.10573	99.8519	76.52	105.69	97.33
2019-10-15 02:32:14	43753.1	1.10573	100.205	76.83	106.11	97.57
2019-10-15 02:32:14	43753.1	1.10573	100.083	77.51	105.86	97.39
2019-10-15 02:32:14	43753.1	1.10573	100.4	77.83	106.21	97.64
2019-10-15 02:32:14	43753.1	1.10573	100.091	76.33	106.11	97.38
2019-10-15 02:32:14	43753.1	1.10573	99.903	77.28	105.69	97.21
2019-10-15 02:32:14	43753.1	1.10573	100.303	76.71	106.07	98.02
2019-10-15 02:32:14	43753.1	1.10573	98.4205	75.19	104.34	95.7
2019-10-15 02:32:14	43753.1	1.10573	100.018	77.54	105.79	97.3
2019-10-15 02:32:14	43753.1	1.10573	99.7684	77.21	105.52	97.12
2019-10-15 02:32:14	43753.1	1.10573	99.7477	76.59	105.57	97.19
2019-10-15 02:32:14	43753.1	1.10573	100.534	77.69	106.35	97.87
2019-10-15 02:32:14	43753.1	1.10573	100.628	77.57	106.36	98.21
2019-10-15 02:32:14	43753.1	1.10573	99.3162	76.22	105.08	96.85
2019-10-15 02:32:14	43753.1	1.10573	100.368	77.68	106.15	97.71
2019-10-15 02:32:14	43753.1	1.10573	101.122	78.06	107.01	98.4
2019-10-15 02:32:14	43753.1	1.10573	99.8385	76.6	105.57	97.49
2019-10-15 02:32:14	43753.1	1.10573	99.8187	77.01	105.65	97.11
2019-10-15 02:32:14	43753.1	1.10573	99.7868	76.77	105.52	97.35
2019-10-15 02:32:14	43753.1	1.10573	100.098	77.61	105.84	97.44
2019-10-15 02:32:14	43753.1	1.10573	99.269	75.83	105.04	96.92
2019-10-15 02:32:14	43753.1	1.10573	97.8447	72.77	104.06	95.25
2019-10-15 02:32:14	43753.1	1.10573	100.589	77.75	106.36	98.01
2019-10-15 02:32:14	43753.1	1.10573	99.5186	76.5	105.35	96.89
2019-10-15 02:32:14	43753.1	1.10573	99.7595	76.04	105.56	97.46
2019-10-15 02:32:14	43753.1	1.10573	99.3592	76.37	105.18	96.74
2019-10-15 02:32:14	43753.1	1.10573	101.201	78.61	106.94	98.59
2019-10-15 02:32:14	43753.1	1.10573	100.381	77.66	106.16	97.74
2019-10-15 02:32:14	43753.1	1.10573	100.154	77.26	105.99	97.47
2019-10-15 02:32:14	43753.1	1.10573	99.4787	76.35	105.25	97.01
2019-10-15 02:32:14	43753.1	1.10573	100.586	77.78	106.39	97.93
2019-10-15 02:32:14	43753.1	1.10573	99.7814	76.21	105.61	97.37
2019-10-15 02:32:14	43753.1	1.10573	99.1561	75.98	104.91	96.74
2019-10-15 02:32:14	43753.1	1.10573	98.8543	75.91	104.72	96.13
2019-10-15 02:32:14	43753.1	1.10573	99.4787	76.85	105.29	96.74
2019-10-15 03:02:15	43753.1	1.12656	100.379	75.88	102.79	105.03
2019-10-15 03:02:15	43753.1	1.12656	101.019	80.03	103.28	104.62
2019-10-15 03:02:15	43753.1	1.12656	103.175	80.92	105.39	107.35
2019-10-15 03:02:15	43753.1	1.12656	101.677	80.71	104.02	105.11
2019-10-15 03:02:15	43753.1	1.12656	104.141	77.6	107.15	108.4
2019-10-15 03:02:15	43753.1	1.12656	101.359	79.75	103.66	105.12
2019-10-15 03:02:15	43753.1	1.12656	100.209	75.68	102.62	104.87
2019-10-15 03:02:15	43753.1	1.12656	102.845	81.2	105.11	106.69
2019-10-15 03:02:15	43753.1	1.12656	101.63	79.83	104.02	105.29
2019-10-15 03:02:15	43753.1	1.12656	101.766	79.46	104.12	105.69
2019-10-15 03:02:15	43753.1	1.12656	101.443	83.02	103.75	103.97
2019-10-15 03:02:15	43753.1	1.12656	100.607	76.79	102.92	105.19
2019-10-15 03:02:15	43753.1	1.12656	101.308	78.92	103.75	105.09
2019-10-15 03:02:15	43753.1	1.12656	99.7871	77.11	102.03	104.07
2019-10-15 03:02:15	43753.1	1.12656	101.553	80.63	103.87	105.02
2019-10-15 03:02:15	43753.1	1.12656	100.909	77.5	103.22	105.34
2019-10-15 03:02:15	43753.1	1.12656	100.437	77.95	102.73	104.55
2019-10-15 03:02:15	43753.1	1.12656	101.746	79.19	103.99	105.98
2019-10-15 03:02:15	43753.1	1.12656	102.534	81.38	105.08	105.64
2019-10-15 03:02:15	43753.1	1.12656	101.219	80.08	103.54	104.76
2019-10-15 03:02:15	43753.1	1.12656	101.234	77.92	103.58	105.56
2019-10-15 03:02:15	43753.1	1.12656	100.632	80.38	103.01	103.72
2019-10-15 03:02:15	43753.1	1.12656	100.944	77.89	103.31	105.13
2019-10-15 03:02:15	43753.1	1.12656	103.342	78.19	105.74	108.27
2019-10-15 03:02:15	43753.1	1.12656	103.575	83.38	106	106.55
2019-10-15 03:02:15	43753.1	1.12656	101.004	78.47	103.36	105.01
2019-10-15 03:02:15	43753.1	1.12656	103.044	84.52	105.27	105.77
2019-10-15 03:02:15	43753.1	1.12656	107.925	88.49	110.09	111.12
2019-10-15 03:02:15	43753.1	1.12656	99.8799	77.3	102.09	104.19
2019-10-15 03:02:15	43753.1	1.12656	101.076	81.89	103.35	103.96
2019-10-15 03:02:15	43753.1	1.12656	100.683	77.67	103.05	104.85
2019-10-15 03:02:15	43753.1	1.12656	100.976	80.18	103.33	104.32
2019-10-15 03:02:15	43753.1	1.12656	100.423	75.59	102.88	105.11
2019-10-15 03:02:15	43753.1	1.12656	102.358	80.54	104.79	105.94
2019-10-15 03:02:15	43753.1	1.12656	102.381	83.31	104.59	105.35
2019-10-15 03:02:15	43753.1	1.12656	106.701	90.4	108.72	108.98
2019-10-15 03:02:15	43753.1	1.12656	102.539	81.53	104.88	105.99
2019-10-15 03:02:15	43753.1	1.12656	105.005	90.64	107.26	106.08
2019-10-15 03:02:15	43753.1	1.12656	102.346	82.8	104.62	105.37
2019-10-15 03:02:15	43753.1	1.12656	99.8718	73.5	102.4	105.01
2019-10-15 03:02:15	43753.1	1.12656	102.469	81.05	104.88	105.94
2019-10-15 03:02:15	43753.1	1.12656	102.525	83.17	104.69	105.69
2019-10-15 03:02:15	43753.1	1.12656	100.818	78.48	103.25	104.6
2019-10-15 03:02:15	43753.1	1.12656	100.738	77.74	103.14	104.83
2019-10-15 03:02:15	43753.1	1.12656	101.754	81.68	103.87	105.29
2019-10-15 03:02:15	43753.1	1.12656	101.2	78.01	103.56	105.45
2019-10-15 03:02:15	43753.1	1.12656	101.551	85.26	103.86	103.26
2019-10-15 03:32:15	43753.1	1.1474	102.594	80.71	105.19	105.88
2019-10-15 03:32:15	43753.1	1.1474	102.443	77.51	105.47	106.05
2019-10-15 03:32:14	43753.1	1.1474	101.04	79.58	103.51	104.41
2019-10-15 03:32:14	43753.1	1.1474	101.766	81.66	104.21	104.67
2019-10-15 03:32:14	43753.1	1.1474	101.611	70.12	105.24	106.55
2019-10-15 03:32:14	43753.1	1.1474	101.312	78.22	104.02	104.84
2019-10-15 03:32:14	43753.1	1.1474	102.302	79.74	105.06	105.53
2019-10-15 03:32:14	43753.1	1.1474	103.664	82.69	106.2	106.72
2019-10-15 03:32:14	43753.1	1.1474	101.205	77.24	104.04	104.82
2019-10-15 03:32:14	43753.1	1.1474	101.308	79.33	103.91	104.62
2019-10-15 03:32:14	43753.1	1.1474	102.25	77.59	105.35	105.61
2019-10-15 03:32:14	43753.1	1.1474	101.071	78.61	103.64	104.63
2019-10-15 03:32:14	43753.1	1.1474	101.437	81.86	103.84	104.22
2019-10-15 03:32:14	43753.1	1.1474	101.417	77.05	104.25	105.19
2019-10-15 03:32:14	43753.1	1.1474	101.676	76.54	104.78	105.21
2019-10-15 03:32:14	43753.1	1.1474	100.597	79.1	103.13	103.86
2019-10-15 03:32:14	43753.1	1.1474	100.76	74.22	103.88	104.8
2019-10-15 03:32:14	43753.1	1.1474	100.941	78.72	103.55	104.33
2019-10-15 03:32:14	43753.1	1.1474	101.895	78.42	104.73	105.32
2019-10-15 03:32:14	43753.1	1.1474	101.425	77.22	104.47	104.72
2019-10-15 03:32:14	43753.1	1.1474	100.989	77.38	103.73	104.65
2019-10-15 03:32:14	43753.1	1.1474	101.306	76.77	104.38	104.67
2019-10-15 03:32:14	43753.1	1.1474	101.697	81.72	104.06	104.71
2019-10-15 03:32:14	43753.1	1.1474	101.459	77.08	104.53	104.77
2019-10-15 03:32:14	43753.1	1.1474	101.278	76.31	104.28	104.95
2019-10-15 03:32:14	43753.1	1.1474	101.595	82.18	103.97	104.37
2019-10-15 03:32:14	43753.1	1.1474	102.43	77.23	105.57	105.92
2019-10-15 03:32:14	43753.1	1.1474	101.025	76.27	104.12	104.43
2019-10-15 03:32:14	43753.1	1.1474	101.124	76.07	103.91	105.25
2019-10-15 03:32:14	43753.1	1.1474	102.652	78.52	105.65	106.01
2019-10-15 03:32:14	43753.1	1.1474	101.358	82.02	103.74	104.09
2019-10-15 03:32:14	43753.1	1.1474	101.903	76.2	105.03	105.61
2019-10-15 03:32:14	43753.1	1.1474	101.957	79.57	104.52	105.5
2019-10-15 03:32:14	43753.1	1.1474	101.121	73.61	104.39	105.24
2019-10-15 03:32:14	43753.1	1.1474	101.737	76.42	104.8	105.42
2019-10-15 03:32:14	43753.1	1.1474	100.681	75.71	103.73	104.26
2019-10-15 03:32:14	43753.1	1.1474	102.034	79.8	104.74	105.24
2019-10-15 03:32:14	43753.1	1.1474	101.423	76.52	104.45	105.02
2019-10-15 03:32:14	43753.1	1.1474	101.061	75.47	104.13	104.84
2019-10-15 03:32:14	43753.1	1.1474	101.944	78.26	104.85	105.31
2019-10-15 03:32:14	43753.1	1.1474	102.041	80.24	104.61	105.35
2019-10-15 03:32:14	43753.1	1.1474	101.996	77.29	104.94	105.68
2019-10-15 03:32:14	43753.1	1.1474	101.424	81.59	103.9	104.16
2019-10-15 03:32:14	43753.1	1.1474	102.782	81.78	105.18	106.12
2019-10-15 03:32:14	43753.1	1.1474	100.534	75.5	103.47	104.36
2019-10-15 03:32:14	43753.1	1.1474	100.747	78.29	103.38	104.18
2019-10-15 03:32:14	43753.1	1.1474	101.754	76.47	104.82	105.42
2019-10-15 04:02:15	43753.2	1.16823	62.473	14.96	67.39	71.02
2019-10-15 04:02:15	43753.2	1.16823	77.7047	27.31	84.26	84.14
2019-10-15 04:02:14	43753.2	1.16823	37.7196	3.46	39.6	47.15
2019-10-15 04:02:14	43753.2	1.16823	13.6589	1.16	11.7	22.29
2019-10-15 04:02:14	43753.2	1.16823	34.3902	2.61	35.41	44.56
2019-10-15 04:02:14	43753.2	1.16823	48.0172	7.5	51.51	56.68
2019-10-15 04:02:14	43753.2	1.16823	81.6061	30.94	87.94	88.58
2019-10-15 04:02:14	43753.2	1.16823	46.1653	6.17	49.28	55.37
2019-10-15 04:02:14	43753.2	1.16823	28.4806	1.72	29	37.71
2019-10-15 04:02:14	43753.2	1.16823	23.5397	1.3	23.1	32.92
2019-10-15 04:02:14	43753.2	1.16823	51.0821	8.25	54.81	60.17
2019-10-15 04:02:14	43753.2	1.16823	47.0505	6.82	50.28	56.12
2019-10-15 04:02:14	43753.2	1.16823	52.8002	9.46	56.56	62.02
2019-10-15 04:02:14	43753.2	1.16823	41.1793	4.69	43.78	50.05
2019-10-15 04:02:14	43753.2	1.16823	42.8626	4.99	45.2	52.78
2019-10-15 04:02:14	43753.2	1.16823	26.8402	1.58	27.25	35.71
2019-10-15 04:02:14	43753.2	1.16823	35.5147	2.81	37.4	44.34
2019-10-15 04:02:14	43753.2	1.16823	29.4584	1.91	30.37	38.22
2019-10-15 04:02:14	43753.2	1.16823	54.5028	10.28	58.37	63.85
2019-10-15 04:02:14	43753.2	1.16823	52.1768	9.09	55.6	61.96
2019-10-15 04:02:14	43753.2	1.16823	28.071	1.79	28.66	36.98
2019-10-15 04:02:14	43753.2	1.16823	41.413	4.36	43.56	51.39
2019-10-15 04:02:14	43753.2	1.16823	38.6893	3.66	40.73	48.1
2019-10-15 04:02:14	43753.2	1.16823	51.3453	8.41	54.57	61.46
2019-10-15 04:02:14	43753.2	1.16823	52.0602	8.92	55.46	61.91
2019-10-15 04:02:14	43753.2	1.16823	32.5822	2.36	33.62	42.12
2019-10-15 04:02:14	43753.2	1.16823	46.4595	6.59	48.92	56.9
2019-10-15 04:02:14	43753.2	1.16823	38.5015	3.66	40.15	48.61
2019-10-15 04:02:14	43753.2	1.16823	44.2208	5.55	46.82	53.93
2019-10-15 04:02:14	43753.2	1.16823	40.8982	4.13	42.87	51.11
2019-10-15 04:02:14	43753.2	1.16823	47.5782	6.38	50.44	57.74
2019-10-15 04:02:14	43753.2	1.16823	52.2611	8.72	56.56	60.5
2019-10-15 04:02:14	43753.2	1.16823	42.8333	5	45.25	52.58
2019-10-15 04:02:14	43753.2	1.16823	25.0999	1.36	25.06	34.27
2019-10-15 04:02:14	43753.2	1.16823	61.2935	14.44	65.44	71.1
2019-10-15 04:02:14	43753.2	1.16823	46.392	6.26	49.44	55.78
2019-10-15 04:02:14	43753.2	1.16823	55.1123	10.31	59.24	64.17
2019-10-15 04:02:14	43753.2	1.16823	53.5852	10.11	57.43	62.69
2019-10-15 04:02:14	43753.2	1.16823	66.3655	17.82	70.94	75.98
2019-10-15 04:02:14	43753.2	1.16823	67.1386	17.74	71.82	76.87
2019-10-15 04:02:14	43753.2	1.16823	38.6842	3.67	40.49	48.55
2019-10-15 04:02:14	43753.2	1.16823	80.6196	29.79	86.61	88.33
2019-10-15 04:02:14	43753.2	1.16823	46.8379	6.33	49.57	56.99
2019-10-15 04:02:14	43753.2	1.16823	51.4582	8.93	55.14	60.52
2019-10-15 04:02:14	43753.2	1.16823	45.2501	5.66	48.12	54.78
2019-10-15 04:02:14	43753.2	1.16823	35.7733	2.85	37.67	44.66
2019-10-15 04:02:14	43753.2	1.16823	55.549	11.06	59.41	65.01
2019-10-15 04:32:15	43753.2	1.18906	102.46	62.85	105.63	111.41
2019-10-15 04:32:15	43753.2	1.18906	99.827	56.49	103.61	109
2019-10-15 04:32:15	43753.2	1.18906	103.555	64.53	106.73	112.27
2019-10-15 04:32:15	43753.2	1.18906	106.676	69.72	109.83	114.64
2019-10-15 04:32:15	43753.2	1.18906	104.41	60.97	108.54	112.94
2019-10-15 04:32:15	43753.2	1.18906	102.521	64.92	105.41	111.25
2019-10-15 04:32:15	43753.2	1.18906	99.1068	57.05	102.38	108.79
2019-10-15 04:32:15	43753.2	1.18906	101.237	61.37	104.44	110.22
2019-10-15 04:32:15	43753.2	1.18906	103.191	66.09	106.09	111.71
2019-10-15 04:32:15	43753.2	1.18906	103.506	63.83	106.9	112.04
2019-10-15 04:32:15	43753.2	1.18906	102.135	60.76	106.11	110.18
2019-10-15 04:32:15	43753.2	1.18906	102.252	62.39	105.39	111.36
2019-10-15 04:32:15	43753.2	1.18906	100.9	60.17	104.14	110.14
2019-10-15 04:32:15	43753.2	1.18906	104.481	64.56	107.88	113.1
2019-10-15 04:32:15	43753.2	1.18906	101.192	60.39	104.88	109.58
2019-10-15 04:32:15	43753.2	1.18906	101.691	61.59	104.85	110.85
2019-10-15 04:32:15	43753.2	1.18906	101.904	59.97	105.58	110.75
2019-10-15 04:32:15	43753.2	1.18906	102.219	62.61	105.21	111.52
2019-10-15 04:32:15	43753.2	1.18906	105.879	69.17	108.9	114.01
2019-10-15 04:32:15	43753.2	1.18906	102.988	63.05	106.74	110.92
2019-10-15 04:32:15	43753.2	1.18906	100.002	60.44	103.03	109.21
2019-10-15 04:32:15	43753.2	1.18906	100.569	57.83	104.48	109.26
2019-10-15 04:32:15	43753.2	1.18906	101.824	63.33	104.87	110.59
2019-10-15 04:32:15	43753.2	1.18906	99.975	58.01	103.53	109.07
2019-10-15 04:32:15	43753.2	1.18906	102.997	65.23	106.03	111.51
2019-10-15 04:32:15	43753.2	1.18906	103.67	65.77	106.73	112.18
2019-10-15 04:32:15	43753.2	1.18906	102.278	59.9	106.18	110.85
2019-10-15 04:32:15	43753.2	1.18906	98.0099	54.43	101.75	107.36
2019-10-15 04:32:15	43753.2	1.18906	101.627	63.41	104.6	110.43
2019-10-15 04:32:15	43753.2	1.18906	100.928	59.38	104.79	109.26
2019-10-15 04:32:15	43753.2	1.18906	105.212	67.25	108.29	113.71
2019-10-15 04:32:15	43753.2	1.18906	98.3495	55.71	102.13	107.26
2019-10-15 04:32:15	43753.2	1.18906	100.176	60.05	103.26	109.49
2019-10-15 04:32:15	43753.2	1.18906	100.692	57.63	104.45	109.81
2019-10-15 04:32:15	43753.2	1.18906	100.539	57.36	104.43	109.44
2019-10-15 04:32:15	43753.2	1.18906	102.117	59.86	106	110.68
2019-10-15 04:32:15	43753.2	1.18906	104.029	65.29	107.16	112.72
2019-10-15 04:32:15	43753.2	1.18906	101.978	60	105.92	110.32
2019-10-15 04:32:15	43753.2	1.18906	101.718	58.71	105.61	110.55
2019-10-15 04:32:15	43753.2	1.18906	99.8855	57.27	103.43	109.25
2019-10-15 04:32:15	43753.2	1.18906	102.707	65.16	105.61	111.39
2019-10-15 04:32:15	43753.2	1.18906	101.019	57.73	104.88	110.02
2019-10-15 04:32:15	43753.2	1.18906	100.708	61.37	103.88	109.55
2019-10-15 04:32:15	43753.2	1.18906	102.973	63.67	106.14	111.81
2019-10-15 04:32:15	43753.2	1.18906	103.526	66.33	106.42	112.09
2019-10-15 04:32:15	43753.2	1.18906	102.915	63.26	106.08	111.89
2019-10-15 04:32:15	43753.2	1.18906	101.082	59.16	105.07	109.31
2019-10-15 05:02:15	43753.2	1.2099	99.6417	45.65	107.04	105.8
2019-10-15 05:02:15	43753.2	1.2099	101.484	48.39	108.79	107.48
2019-10-15 05:02:14	43753.2	1.2099	101.046	46.13	108.55	107.35
2019-10-15 05:02:14	43753.2	1.2099	101.71	47.2	109.28	107.73
2019-10-15 05:02:14	43753.2	1.2099	102.801	48.54	110.19	109.08
2019-10-15 05:02:14	43753.2	1.2099	101.729	45.32	109.46	108.16
2019-10-15 05:02:14	43753.2	1.2099	101.834	49.45	108.91	108.01
2019-10-15 05:02:14	43753.2	1.2099	101.672	48.2	108.98	107.81
2019-10-15 05:02:14	43753.2	1.2099	100.335	45.29	107.9	106.57
2019-10-15 05:02:14	43753.2	1.2099	101.246	47.44	108.63	107.36
2019-10-15 05:02:14	43753.2	1.2099	102.679	49.68	110	108.61
2019-10-15 05:02:14	43753.2	1.2099	99.9301	46.48	107.38	105.78
2019-10-15 05:02:14	43753.2	1.2099	100.623	47.58	107.97	106.52
2019-10-15 05:02:14	43753.2	1.2099	101.503	49.1	108.73	107.39
2019-10-15 05:02:14	43753.2	1.2099	102.168	48.93	109.54	108.09
2019-10-15 05:02:14	43753.2	1.2099	102.104	46.2	109.76	108.49
2019-10-15 05:02:14	43753.2	1.2099	103.658	51.68	110.87	109.41
2019-10-15 05:02:14	43753.2	1.2099	101.643	44.8	109.43	108.13
2019-10-15 05:02:14	43753.2	1.2099	101.96	48.57	109.23	108.14
2019-10-15 05:02:14	43753.2	1.2099	103.32	51.2	110.53	109.13
2019-10-15 05:02:14	43753.2	1.2099	101.577	45.33	109.28	108
2019-10-15 05:02:14	43753.2	1.2099	101.772	51.46	108.59	107.66
2019-10-15 05:02:14	43753.2	1.2099	102.373	49.97	109.62	108.22
2019-10-15 05:02:14	43753.2	1.2099	103.575	51.16	110.79	109.49
2019-10-15 05:02:14	43753.2	1.2099	102.38	48.84	109.68	108.56
2019-10-15 05:02:14	43753.2	1.2099	103.269	52.38	110.27	109.02
2019-10-15 05:02:14	43753.2	1.2099	100.976	50.52	107.84	106.83
2019-10-15 05:02:14	43753.2	1.2099	102.104	49.5	109.39	107.95
2019-10-15 05:02:14	43753.2	1.2099	102.591	51.12	109.9	107.96
2019-10-15 05:02:14	43753.2	1.2099	102.74	50.13	110.01	108.62
2019-10-15 05:02:14	43753.2	1.2099	101.844	50.5	108.88	107.7
2019-10-15 05:02:14	43753.2	1.2099	100.728	46.3	108.24	106.83
2019-10-15 05:02:14	43753.2	1.2099	101.665	49.81	108.99	107.15
2019-10-15 05:02:14	43753.2	1.2099	103.267	50.22	110.55	109.29
2019-10-15 05:02:14	43753.2	1.2099	101.474	50.18	108.51	107.31
2019-10-15 05:02:14	43753.2	1.2099	100.774	47.32	108.18	106.71
2019-10-15 05:02:14	43753.2	1.2099	101.711	49.54	108.83	107.72
2019-10-15 05:02:14	43753.2	1.2099	101.379	46.68	108.96	107.45
2019-10-15 05:02:14	43753.2	1.2099	101.444	50.02	108.52	107.25
2019-10-15 05:02:14	43753.2	1.2099	103.076	50.86	110.17	109.15
2019-10-15 05:02:14	43753.2	1.2099	101.218	47.98	108.6	107.12
2019-10-15 05:02:14	43753.2	1.2099	101.826	48	109.24	107.89
2019-10-15 05:02:14	43753.2	1.2099	102.122	48.51	109.61	107.96
2019-10-15 05:02:14	43753.2	1.2099	101.805	48.21	109.25	107.72
2019-10-15 05:02:14	43753.2	1.2099	104.439	51.88	111.73	110.26
2019-10-15 05:02:14	43753.2	1.2099	101.858	45.93	109.52	108.24
2019-10-15 05:02:14	43753.2	1.2099	101.364	47.71	108.79	107.34
2019-10-15 05:32:15	43753.2	1.23073	95.2569	87.82	98.23	92.27
2019-10-15 05:32:15	43753.2	1.23073	95.6887	89.26	98.41	92.81
2019-10-15 05:32:14	43753.2	1.23073	95.562	88.64	98.32	92.8
2019-10-15 05:32:14	43753.2	1.23073	96.8773	90.51	99.27	94.62
2019-10-15 05:32:14	43753.2	1.23073	96.9543	89.93	99.81	94.04
2019-10-15 05:32:14	43753.2	1.23073	94.9218	88.24	97.48	92.46
2019-10-15 05:32:14	43753.2	1.23073	96.4562	89.71	99.34	93.38
2019-10-15 05:32:14	43753.2	1.23073	95.4631	88.17	98.34	92.61
2019-10-15 05:32:14	43753.2	1.23073	95.2915	88.69	97.89	92.72
2019-10-15 05:32:14	43753.2	1.23073	95.6646	88.57	98.58	92.66
2019-10-15 05:32:14	43753.2	1.23073	94.9443	87.8	97.91	91.86
2019-10-15 05:32:14	43753.2	1.23073	96.2935	89.55	99.15	93.27
2019-10-15 05:32:14	43753.2	1.23073	94.7451	87.6	97.64	91.8
2019-10-15 05:32:14	43753.2	1.23073	95.1861	87.98	98.18	92.07
2019-10-15 05:32:14	43753.2	1.23073	94.8883	87.88	97.86	91.74
2019-10-15 05:32:14	43753.2	1.23073	96.3413	90.14	98.78	93.93
2019-10-15 05:32:14	43753.2	1.23073	95.124	87.84	98.02	92.23
2019-10-15 05:32:14	43753.2	1.23073	95.7485	89.35	98.26	93.27
2019-10-15 05:32:14	43753.2	1.23073	96.3247	89.62	98.95	93.74
2019-10-15 05:32:14	43753.2	1.23073	94.9567	87.98	97.84	91.97
2019-10-15 05:32:14	43753.2	1.23073	95.944	89.27	98.4	93.68
2019-10-15 05:32:14	43753.2	1.23073	95.8489	89.68	98.28	93.44
2019-10-15 05:32:14	43753.2	1.23073	94.166	87.14	97.14	91.02
2019-10-15 05:32:14	43753.2	1.23073	94.8681	88.29	97.71	91.81
2019-10-15 05:32:14	43753.2	1.23073	95.7911	89.16	98.39	93.23
2019-10-15 05:32:14	43753.2	1.23073	94.6413	87.57	97.53	91.68
2019-10-15 05:32:14	43753.2	1.23073	95.8148	89.77	98.24	93.37
2019-10-15 05:32:14	43753.2	1.23073	93.8245	87.04	96.72	90.74
2019-10-15 05:32:14	43753.2	1.23073	95.4624	88.99	98.24	92.49
2019-10-15 05:32:14	43753.2	1.23073	95.0145	88.03	98	91.83
2019-10-15 05:32:14	43753.2	1.23073	94.0945	86.77	97.07	91.06
2019-10-15 05:32:14	43753.2	1.23073	94.562	87.08	97.73	91.21
2019-10-15 05:32:14	43753.2	1.23073	95.7612	88.95	98.64	92.72
2019-10-15 05:32:14	43753.2	1.23073	95.7664	88.98	98.49	93.02
2019-10-15 05:32:14	43753.2	1.23073	95.472	89.23	97.97	92.96
2019-10-15 05:32:14	43753.2	1.23073	94.2877	87.4	97.2	91.21
2019-10-15 05:32:14	43753.2	1.23073	95.9648	89.03	98.63	93.39
2019-10-15 05:32:14	43753.2	1.23073	94.6288	87.75	97.55	91.53
2019-10-15 05:32:14	43753.2	1.23073	95.1683	88.97	97.61	92.75
2019-10-15 05:32:14	43753.2	1.23073	95.3562	88.38	98.29	92.27
2019-10-15 05:32:14	43753.2	1.23073	95.3409	88.03	98.48	91.98
2019-10-15 05:32:14	43753.2	1.23073	95.4473	89.43	97.95	92.84
2019-10-15 05:32:14	43753.2	1.23073	95.8548	88.85	98.61	93.13
2019-10-15 05:32:14	43753.2	1.23073	95.4494	88.55	98.38	92.34
2019-10-15 05:32:14	43753.2	1.23073	95.8552	89.51	98.38	93.33
2019-10-15 05:32:14	43753.2	1.23073	96.4078	90.02	98.82	94.12
2019-10-15 05:32:14	43753.2	1.23073	94.375	87.05	97.31	91.42
2019-10-15 06:02:15	43753.3	1.25156	94.9815	89.72	97.4	92.25
2019-10-15 06:02:15	43753.3	1.25156	93.9164	88.56	96.31	91.27
2019-10-15 06:02:15	43753.3	1.25156	93.8717	88.61	96.27	91.18
2019-10-15 06:02:15	43753.3	1.25156	94.1577	89.07	96.52	91.47
2019-10-15 06:02:15	43753.3	1.25156	93.9509	88.11	96.63	90.93
2019-10-15 06:02:15	43753.3	1.25156	93.7278	88.46	96.11	91.07
2019-10-15 06:02:15	43753.3	1.25156	94.3016	88.86	96.74	91.6
2019-10-15 06:02:15	43753.3	1.25156	94.2494	89.02	96.63	91.58
2019-10-15 06:02:15	43753.3	1.25156	93.7089	88.5	96.07	91.07
2019-10-15 06:02:15	43753.3	1.25156	94.125	88.99	96.49	91.45
2019-10-15 06:02:15	43753.3	1.25156	93.6947	88.36	96.18	90.86
2019-10-15 06:02:15	43753.3	1.25156	93.9112	88.52	96.36	91.17
2019-10-15 06:02:15	43753.3	1.25156	93.7211	88.53	96.09	91.06
2019-10-15 06:02:15	43753.3	1.25156	94.1456	88.94	96.54	91.44
2019-10-15 06:02:15	43753.3	1.25156	93.8518	88.59	96.24	91.18
2019-10-15 06:02:15	43753.3	1.25156	93.8862	88.71	96.27	91.19
2019-10-15 06:02:15	43753.3	1.25156	94.5835	89.31	96.99	91.88
2019-10-15 06:02:15	43753.3	1.25156	93.9586	88.8	96.33	91.28
2019-10-15 06:02:15	43753.3	1.25156	94.4105	89.14	96.82	91.7
2019-10-15 06:02:15	43753.3	1.25156	93.6079	88.29	96.01	90.93
2019-10-15 06:02:15	43753.3	1.25156	93.899	88.72	96.29	91.19
2019-10-15 06:02:15	43753.3	1.25156	93.5912	88.17	96	90.94
2019-10-15 06:02:15	43753.3	1.25156	93.8735	88.75	96.21	91.25
2019-10-15 06:02:15	43753.3	1.25156	94.2098	88.81	96.69	91.41
2019-10-15 06:02:15	43753.3	1.25156	94.3685	89.11	96.79	91.63
2019-10-15 06:02:15	43753.3	1.25156	93.6574	88.49	96.03	90.98
2019-10-15 06:02:15	43753.3	1.25156	93.4836	87.88	95.97	90.75
2019-10-15 06:02:15	43753.3	1.25156	94.1717	88.78	96.58	91.51
2019-10-15 06:02:15	43753.3	1.25156	93.2232	87.85	95.7	90.42
2019-10-15 06:02:15	43753.3	1.25156	93.5272	88.08	95.99	90.78
2019-10-15 06:02:15	43753.3	1.25156	93.7639	88.44	96.15	91.12
2019-10-15 06:02:15	43753.3	1.25156	93.8806	88.43	96.31	91.2
2019-10-15 06:02:15	43753.3	1.25156	92.8274	87.3	95.26	90.17
2019-10-15 06:02:15	43753.3	1.25156	93.7203	88.17	96.22	90.94
2019-10-15 06:02:15	43753.3	1.25156	93.6211	88.1	96.09	90.89
2019-10-15 06:02:15	43753.3	1.25156	93.8087	88.24	96.25	91.15
2019-10-15 06:02:15	43753.3	1.25156	94.5902	89.39	96.94	91.97
2019-10-15 06:02:15	43753.3	1.25156	94.2375	88.92	96.67	91.5
2019-10-15 06:02:15	43753.3	1.25156	94.0908	88.67	96.54	91.36
2019-10-15 06:02:15	43753.3	1.25156	94.2411	88.9	96.68	91.5
2019-10-15 06:02:15	43753.3	1.25156	93.6677	88.68	95.99	91.02
2019-10-15 06:02:15	43753.3	1.25156	94.0993	88.66	96.48	91.51
2019-10-15 06:02:15	43753.3	1.25156	93.739	88.56	96.13	91.03
2019-10-15 06:02:15	43753.3	1.25156	94.6271	89.51	97.01	91.91
2019-10-15 06:02:15	43753.3	1.25156	94.3581	89.17	96.73	91.69
2019-10-15 06:02:15	43753.3	1.25156	94.0031	88.83	96.4	91.28
2019-10-15 06:02:15	43753.3	1.25156	93.7009	88.36	96.16	90.92
2019-10-15 06:32:15	43753.3	1.2724	93.9023	89.71	96.24	90.92
2019-10-15 06:32:15	43753.3	1.2724	92.3639	88.08	94.71	89.4
2019-10-15 06:32:14	43753.3	1.2724	92.5921	88.63	94.9	89.58
2019-10-15 06:32:14	43753.3	1.2724	92.7025	88.76	94.91	89.88
2019-10-15 06:32:14	43753.3	1.2724	95.1703	91.4	97.45	92.14
2019-10-15 06:32:14	43753.3	1.2724	93.1034	89.04	95.34	90.27
2019-10-15 06:32:14	43753.3	1.2724	93.9318	89.84	96.27	90.91
2019-10-15 06:32:14	43753.3	1.2724	92.5741	88.21	94.88	89.72
2019-10-15 06:32:14	43753.3	1.2724	93.0271	88.94	95.26	90.21
2019-10-15 06:32:14	43753.3	1.2724	92.751	88.75	95.02	89.83
2019-10-15 06:32:14	43753.3	1.2724	92.8147	88.66	95.08	89.96
2019-10-15 06:32:14	43753.3	1.2724	93.8287	89.71	96.14	90.87
2019-10-15 06:32:14	43753.3	1.2724	92.8476	88.92	95.07	89.99
2019-10-15 06:32:14	43753.3	1.2724	92.9625	89.02	95.17	90.14
2019-10-15 06:32:14	43753.3	1.2724	92.2717	87.87	94.66	89.27
2019-10-15 06:32:14	43753.3	1.2724	92.6155	88.5	94.95	89.61
2019-10-15 06:32:14	43753.3	1.2724	92.9946	89.1	95.26	90.04
2019-10-15 06:32:14	43753.3	1.2724	92.6408	88.59	94.95	89.66
2019-10-15 06:32:14	43753.3	1.2724	93.4061	89.19	95.73	90.46
2019-10-15 06:32:14	43753.3	1.2724	92.4107	88.23	94.73	89.46
2019-10-15 06:32:14	43753.3	1.2724	92.6297	88.41	94.9	89.79
2019-10-15 06:32:14	43753.3	1.2724	92.3185	88.08	94.76	89.15
2019-10-15 06:32:14	43753.3	1.2724	92.939	88.95	95.22	89.99
2019-10-15 06:32:14	43753.3	1.2724	93.7134	89.73	95.97	90.81
2019-10-15 06:32:14	43753.3	1.2724	93.6169	89.45	95.85	90.83
2019-10-15 06:32:14	43753.3	1.2724	92.9429	88.91	95.26	89.94
2019-10-15 06:32:14	43753.3	1.2724	91.8013	87.42	94.16	88.85
2019-10-15 06:32:14	43753.3	1.2724	93.0969	89.04	95.39	90.15
2019-10-15 06:32:14	43753.3	1.2724	93.7738	89.7	96.14	90.69
2019-10-15 06:32:14	43753.3	1.2724	92.2342	87.95	94.55	89.33
2019-10-15 06:32:14	43753.3	1.2724	93.0133	89.08	95.25	90.13
2019-10-15 06:32:14	43753.3	1.2724	92.2975	87.99	94.65	89.33
2019-10-15 06:32:14	43753.3	1.2724	93.82	89.82	96.18	90.72
2019-10-15 06:32:14	43753.3	1.2724	92.5523	88.41	94.87	89.59
2019-10-15 06:32:14	43753.3	1.2724	91.949	87.6	94.29	89.02
2019-10-15 06:32:14	43753.3	1.2724	93.2069	89.07	95.48	90.33
2019-10-15 06:32:14	43753.3	1.2724	93.1456	88.9	95.48	90.19
2019-10-15 06:32:14	43753.3	1.2724	93.3128	89.27	95.54	90.49
2019-10-15 06:32:14	43753.3	1.2724	92.4641	88.26	94.81	89.47
2019-10-15 06:32:14	43753.3	1.2724	92.3914	88.19	94.71	89.45
2019-10-15 06:32:14	43753.3	1.2724	93.8203	89.87	96.13	90.8
2019-10-15 06:32:14	43753.3	1.2724	93.0017	88.88	95.31	90.05
2019-10-15 06:32:14	43753.3	1.2724	92.3706	88.24	94.68	89.42
2019-10-15 06:32:14	43753.3	1.2724	92.8029	88.94	94.99	89.99
2019-10-15 06:32:14	43753.3	1.2724	93.9158	89.88	96.24	90.9
2019-10-15 06:32:14	43753.3	1.2724	93.7207	89.62	96.06	90.7
2019-10-15 06:32:14	43753.3	1.2724	92.6215	88.65	94.88	89.71
2019-10-15 06:32:14	43753.3	1.2724	92.7145	88.58	94.94	89.93
2019-10-15 07:02:15	43753.3	1.29323	98.9546	78.21	105.4	94.25
2019-10-15 07:02:15	43753.3	1.29323	99.8745	79.29	106.36	95.03
2019-10-15 07:02:14	43753.3	1.29323	101.714	81.21	108.03	97.17
2019-10-15 07:02:14	43753.3	1.29323	100.735	80.31	107.17	95.93
2019-10-15 07:02:14	43753.3	1.29323	98.3819	71.6	105.25	95.16
2019-10-15 07:02:14	43753.3	1.29323	102.843	82.62	109.42	97.68
2019-10-15 07:02:14	43753.3	1.29323	97.5253	75.77	103.99	93.17
2019-10-15 07:02:14	43753.3	1.29323	96.4952	75.01	102.79	92.37
2019-10-15 07:02:14	43753.3	1.29323	102.253	81.73	108.92	97.03
2019-10-15 07:02:14	43753.3	1.29323	98.4988	77.5	104.94	93.9
2019-10-15 07:02:14	43753.3	1.29323	98.2933	76.27	104.58	94.39
2019-10-15 07:02:14	43753.3	1.29323	97.3714	76.16	103.84	92.8
2019-10-15 07:02:14	43753.3	1.29323	98.5713	75.05	104.92	95.12
2019-10-15 07:02:14	43753.3	1.29323	99.5997	78.04	106.11	95.08
2019-10-15 07:02:14	43753.3	1.29323	99.611	78.23	105.98	95.3
2019-10-15 07:02:14	43753.3	1.29323	99.1014	77.33	105.45	94.98
2019-10-15 07:02:14	43753.3	1.29323	103.143	80.72	109.67	98.92
2019-10-15 07:02:14	43753.3	1.29323	97.1911	74.86	103.71	92.95
2019-10-15 07:02:14	43753.3	1.29323	101.328	81.02	107.72	96.56
2019-10-15 07:02:14	43753.3	1.29323	100.509	79.18	106.79	96.35
2019-10-15 07:02:14	43753.3	1.29323	101.983	81.51	108.41	97.21
2019-10-15 07:02:14	43753.3	1.29323	99.381	77.48	105.77	95.23
2019-10-15 07:02:14	43753.3	1.29323	100.217	77.06	106.66	96.44
2019-10-15 07:02:14	43753.3	1.29323	98.8217	77.4	105.25	94.41
2019-10-15 07:02:14	43753.3	1.29323	101.532	81.78	107.94	96.52
2019-10-15 07:02:14	43753.3	1.29323	97.6424	72.6	104.1	94.56
2019-10-15 07:02:14	43753.3	1.29323	98.6999	77.11	105.15	94.31
2019-10-15 07:02:14	43753.3	1.29323	99.1083	77.57	105.68	94.46
2019-10-15 07:02:14	43753.3	1.29323	99.0167	77.89	105.39	94.6
2019-10-15 07:02:14	43753.3	1.29323	99.8132	78.13	106.12	95.74
2019-10-15 07:02:14	43753.3	1.29323	98.0526	73.86	104.38	94.9
2019-10-15 07:02:14	43753.3	1.29323	98.9108	77.46	105.38	94.43
2019-10-15 07:02:14	43753.3	1.29323	101.171	81.27	107.49	96.39
2019-10-15 07:02:14	43753.3	1.29323	96.0127	70.19	102.75	92.68
2019-10-15 07:02:14	43753.3	1.29323	98.6788	77.6	105.11	94.13
2019-10-15 07:02:14	43753.3	1.29323	103.719	84.62	110.04	98.63
2019-10-15 07:02:14	43753.3	1.29323	98.2011	77.68	104.54	93.62
2019-10-15 07:02:14	43753.3	1.29323	96.3031	75.05	102.74	91.81
2019-10-15 07:02:14	43753.3	1.29323	96.2139	74.84	102.69	91.69
2019-10-15 07:02:14	43753.3	1.29323	98.2535	76.48	104.68	93.98
2019-10-15 07:02:14	43753.3	1.29323	96.7034	74.37	103.28	92.35
2019-10-15 07:02:14	43753.3	1.29323	99.4836	79.43	105.86	94.65
2019-10-15 07:02:14	43753.3	1.29323	98.6729	76.63	105.06	94.58
2019-10-15 07:02:14	43753.3	1.29323	98.8016	77.61	105.19	94.38
2019-10-15 07:02:14	43753.3	1.29323	98.7841	78.4	105.22	93.96
2019-10-15 07:02:14	43753.3	1.29323	99.9164	77.74	106.26	95.96
2019-10-15 07:02:14	43753.3	1.29323	98.5203	77.6	104.85	94.11
2019-10-15 07:32:15	43753.3	1.31406	93.3658	87.94	95.9	90.47
2019-10-15 07:32:15	43753.3	1.31406	93.9259	88.65	96.38	91.13
2019-10-15 07:32:15	43753.3	1.31406	92.9255	87.32	95.51	90
2019-10-15 07:32:15	43753.3	1.31406	93.2792	87.65	95.86	90.37
2019-10-15 07:32:15	43753.3	1.31406	94.4081	88.97	96.9	91.6
2019-10-15 07:32:15	43753.3	1.31406	93.1298	87.71	95.67	90.22
2019-10-15 07:32:15	43753.3	1.31406	92.683	87.21	95.22	89.8
2019-10-15 07:32:15	43753.3	1.31406	92.7448	87.16	95.33	89.81
2019-10-15 07:32:15	43753.3	1.31406	92.8982	87.26	95.47	90.01
2019-10-15 07:32:15	43753.3	1.31406	93.3091	87.73	95.88	90.4
2019-10-15 07:32:15	43753.3	1.31406	93.0877	87.7	95.59	90.24
2019-10-15 07:32:15	43753.3	1.31406	93.0513	87.67	95.6	90.11
2019-10-15 07:32:15	43753.3	1.31406	93.2551	87.92	95.7	90.5
2019-10-15 07:32:15	43753.3	1.31406	93.2328	87.68	95.77	90.38
2019-10-15 07:32:15	43753.3	1.31406	94.0066	88.74	96.5	91.13
2019-10-15 07:32:15	43753.3	1.31406	92.9752	87.52	95.52	90.07
2019-10-15 07:32:15	43753.3	1.31406	92.817	87.32	95.32	90.01
2019-10-15 07:32:15	43753.3	1.31406	93.2021	87.8	95.74	90.29
2019-10-15 07:32:15	43753.3	1.31406	92.8894	87.46	95.36	90.12
2019-10-15 07:32:15	43753.3	1.31406	93.6092	88.23	96.08	90.82
2019-10-15 07:32:15	43753.3	1.31406	93.1487	87.72	95.68	90.26
2019-10-15 07:32:15	43753.3	1.31406	93.1208	87.55	95.64	90.31
2019-10-15 07:32:15	43753.3	1.31406	93.5421	88.24	96.03	90.69
2019-10-15 07:32:15	43753.3	1.31406	93.064	87.75	95.55	90.22
2019-10-15 07:32:15	43753.3	1.31406	92.7845	87.53	95.3	89.86
2019-10-15 07:32:15	43753.3	1.31406	93.3917	87.96	95.92	90.51
2019-10-15 07:32:15	43753.3	1.31406	93.2385	87.65	95.76	90.43
2019-10-15 07:32:15	43753.3	1.31406	92.8879	87.53	95.41	89.99
2019-10-15 07:32:15	43753.3	1.31406	93.0256	87.72	95.47	90.26
2019-10-15 07:32:15	43753.3	1.31406	93.1998	87.57	95.73	90.39
2019-10-15 07:32:15	43753.3	1.31406	93.2982	87.89	95.82	90.42
2019-10-15 07:32:15	43753.3	1.31406	93.7099	88.26	96.2	90.91
2019-10-15 07:32:15	43753.3	1.31406	92.9802	87.61	95.46	90.17
2019-10-15 07:32:15	43753.3	1.31406	92.5114	87	95.05	89.64
2019-10-15 07:32:15	43753.3	1.31406	93.2197	87.69	95.71	90.45
2019-10-15 07:32:15	43753.3	1.31406	92.6696	87.34	95.08	89.98
2019-10-15 07:32:15	43753.3	1.31406	92.9195	87.52	95.42	90.08
2019-10-15 07:32:15	43753.3	1.31406	92.8951	87.74	95.31	90.13
2019-10-15 07:32:15	43753.3	1.31406	93.992	88.56	96.5	91.15
2019-10-15 07:32:15	43753.3	1.31406	92.7948	87.39	95.35	89.85
2019-10-15 07:32:15	43753.3	1.31406	92.5339	86.99	95.08	89.66
2019-10-15 07:32:15	43753.3	1.31406	93.9993	88.57	96.48	91.21
2019-10-15 07:32:15	43753.3	1.31406	93.023	87.52	95.52	90.23
2019-10-15 07:32:15	43753.3	1.31406	93.3137	87.87	95.83	90.46
2019-10-15 07:32:15	43753.3	1.31406	93.0092	87.74	95.53	90.08
2019-10-15 07:32:15	43753.3	1.31406	93.0654	87.48	95.6	90.23
2019-10-15 07:32:15	43753.3	1.31406	92.867	87.47	95.33	90.1
2019-10-15 08:02:15	43753.3	1.3349	93.3479	87.75	95.82	90.64
2019-10-15 08:02:15	43753.3	1.3349	93.0892	87.48	95.61	90.29
2019-10-15 08:02:14	43753.3	1.3349	92.8276	86.79	95.37	90.15
2019-10-15 08:02:14	43753.3	1.3349	93.4638	87.81	95.96	90.73
2019-10-15 08:02:14	43753.3	1.3349	95.0488	89.08	97.66	92.21
2019-10-15 08:02:14	43753.3	1.3349	92.9889	87.22	95.5	90.27
2019-10-15 08:02:14	43753.3	1.3349	93.0593	87.42	95.53	90.37
2019-10-15 08:02:14	43753.3	1.3349	93.1716	87.24	95.67	90.54
2019-10-15 08:02:14	43753.3	1.3349	92.9769	87.25	95.54	90.14
2019-10-15 08:02:14	43753.3	1.3349	92.8303	87.1	95.36	90.06
2019-10-15 08:02:14	43753.3	1.3349	92.9689	87.28	95.5	90.18
2019-10-15 08:02:14	43753.3	1.3349	94.4428	88.76	96.99	91.62
2019-10-15 08:02:14	43753.3	1.3349	92.6735	86.74	95.27	89.85
2019-10-15 08:02:14	43753.3	1.3349	92.9039	87.28	95.43	90.1
2019-10-15 08:02:14	43753.3	1.3349	93.462	88.08	95.94	90.66
2019-10-15 08:02:14	43753.3	1.3349	93.1977	87.29	95.72	90.51
2019-10-15 08:02:14	43753.3	1.3349	93.4604	87.78	95.96	90.73
2019-10-15 08:02:14	43753.3	1.3349	92.9736	86.93	95.5	90.33
2019-10-15 08:02:14	43753.3	1.3349	94.8726	89.41	97.28	92.24
2019-10-15 08:02:14	43753.3	1.3349	93.1158	87.58	95.59	90.38
2019-10-15 08:02:14	43753.3	1.3349	92.9314	87.05	95.43	90.28
2019-10-15 08:02:14	43753.3	1.3349	92.8634	87.11	95.44	90.01
2019-10-15 08:02:14	43753.3	1.3349	93.1142	87.47	95.68	90.24
2019-10-15 08:02:14	43753.3	1.3349	93.3137	87.79	95.81	90.53
2019-10-15 08:02:14	43753.3	1.3349	93.0696	87.59	95.55	90.3
2019-10-15 08:02:14	43753.3	1.3349	92.8267	87.23	95.41	89.9
2019-10-15 08:02:14	43753.3	1.3349	93.0203	87.42	95.54	90.22
2019-10-15 08:02:14	43753.3	1.3349	92.9511	87.2	95.47	90.21
2019-10-15 08:02:14	43753.3	1.3349	93.2273	87.66	95.79	90.33
2019-10-15 08:02:14	43753.3	1.3349	92.9471	87.32	95.45	90.19
2019-10-15 08:02:14	43753.3	1.3349	93.2038	87.37	95.73	90.48
2019-10-15 08:02:14	43753.3	1.3349	93.326	87.77	95.84	90.52
2019-10-15 08:02:14	43753.3	1.3349	94.0992	88.49	96.62	91.3
2019-10-15 08:02:14	43753.3	1.3349	93.0883	87.14	95.68	90.28
2019-10-15 08:02:14	43753.3	1.3349	92.655	86.94	95.23	89.79
2019-10-15 08:02:14	43753.3	1.3349	93.2822	87.64	95.76	90.58
2019-10-15 08:02:14	43753.3	1.3349	94.6417	88.94	97.08	92.04
2019-10-15 08:02:14	43753.3	1.3349	93.0083	87.37	95.57	90.14
2019-10-15 08:02:14	43753.3	1.3349	92.787	87.24	95.32	89.94
2019-10-15 08:02:14	43753.3	1.3349	92.9049	87.26	95.4	90.17
2019-10-15 08:02:14	43753.3	1.3349	92.8444	87.07	95.39	90.06
2019-10-15 08:02:14	43753.3	1.3349	92.9783	87.39	95.52	90.13
2019-10-15 08:02:14	43753.3	1.3349	93.4066	87.62	95.92	90.69
2019-10-15 08:02:14	43753.3	1.3349	93.2812	87.64	95.85	90.4
2019-10-15 08:02:14	43753.3	1.3349	93.1648	87.58	95.75	90.23
2019-10-15 08:02:14	43753.3	1.3349	93.0003	87.01	95.54	90.31
2019-10-15 08:02:14	43753.3	1.3349	93.2743	87.76	95.82	90.39
2019-10-15 08:32:15	43753.4	1.35573	94.0162	88.88	96.27	91.56
2019-10-15 08:32:15	43753.4	1.35573	94.3076	89.46	96.47	91.92
2019-10-15 08:32:14	43753.4	1.35573	93.8773	88.91	96.17	91.28
2019-10-15 08:32:14	43753.4	1.35573	92.6763	87.73	95	90.01
2019-10-15 08:32:14	43753.4	1.35573	95.084	90.07	97.43	92.4
2019-10-15 08:32:14	43753.4	1.35573	93.7	88.62	95.96	91.21
2019-10-15 08:32:14	43753.4	1.35573	94.3066	89.3	96.52	91.88
2019-10-15 08:32:14	43753.4	1.35573	93.8316	88.74	96.11	91.31
2019-10-15 08:32:14	43753.4	1.35573	93.565	88.45	95.87	91
2019-10-15 08:32:14	43753.4	1.35573	93.9869	89.09	96.23	91.46
2019-10-15 08:32:14	43753.4	1.35573	94.1939	89.27	96.4	91.75
2019-10-15 08:32:14	43753.4	1.35573	92.9272	87.7	95.24	90.39
2019-10-15 08:32:14	43753.4	1.35573	92.9376	87.95	95.27	90.27
2019-10-15 08:32:14	43753.4	1.35573	93.6143	88.75	95.87	91.05
2019-10-15 08:32:14	43753.4	1.35573	94.0559	89.09	96.21	91.73
2019-10-15 08:32:14	43753.4	1.35573	93.7953	88.63	96.09	91.27
2019-10-15 08:32:14	43753.4	1.35573	93.5514	88.72	95.84	90.91
2019-10-15 08:32:14	43753.4	1.35573	93.3741	88.2	95.68	90.83
2019-10-15 08:32:14	43753.4	1.35573	93.7293	88.49	96.02	91.24
2019-10-15 08:32:14	43753.4	1.35573	93.6879	88.51	95.92	91.29
2019-10-15 08:32:14	43753.4	1.35573	93.4165	88.57	95.67	90.85
2019-10-15 08:32:14	43753.4	1.35573	93.8241	88.83	96.1	91.27
2019-10-15 08:32:14	43753.4	1.35573	93.726	88.77	95.97	91.22
2019-10-15 08:32:14	43753.4	1.35573	93.9776	88.95	96.16	91.62
2019-10-15 08:32:14	43753.4	1.35573	93.7784	88.71	96.02	91.32
2019-10-15 08:32:14	43753.4	1.35573	92.3193	87.4	94.68	89.57
2019-10-15 08:32:14	43753.4	1.35573	93.4692	88.51	95.69	91.01
2019-10-15 08:32:14	43753.4	1.35573	93.9699	88.86	96.2	91.55
2019-10-15 08:32:14	43753.4	1.35573	94.2341	89.52	96.44	91.71
2019-10-15 08:32:14	43753.4	1.35573	93.8845	89.01	96.02	91.56
2019-10-15 08:32:14	43753.4	1.35573	92.6928	87.61	94.97	90.17
2019-10-15 08:32:14	43753.4	1.35573	94.3402	89.38	96.47	92.06
2019-10-15 08:32:14	43753.4	1.35573	93.2407	88.22	95.52	90.69
2019-10-15 08:32:14	43753.4	1.35573	93.3252	88.37	95.64	90.68
2019-10-15 08:32:14	43753.4	1.35573	93.8903	88.91	96.08	91.5
2019-10-15 08:32:14	43753.4	1.35573	93.672	88.53	95.94	91.19
2019-10-15 08:32:14	43753.4	1.35573	92.9303	87.62	95.21	90.49
2019-10-15 08:32:14	43753.4	1.35573	93.5985	88.48	95.85	91.14
2019-10-15 08:32:14	43753.4	1.35573	94.1246	89.15	96.29	91.78
2019-10-15 08:32:14	43753.4	1.35573	94.02	88.96	96.22	91.64
2019-10-15 08:32:14	43753.4	1.35573	93.5747	88.43	95.86	91.06
2019-10-15 08:32:14	43753.4	1.35573	94.2712	89.27	96.44	91.93
2019-10-15 08:32:14	43753.4	1.35573	93.0053	88.05	95.31	90.38
2019-10-15 08:32:14	43753.4	1.35573	94.0819	89.04	96.31	91.64
2019-10-15 08:32:14	43753.4	1.35573	92.8852	87.9	95.16	90.33
2019-10-15 08:32:14	43753.4	1.35573	93.6882	88.62	95.95	91.19
2019-10-15 08:32:14	43753.4	1.35573	94.2128	89.28	96.42	91.77
2019-10-15 09:02:15	43753.4	1.37656	92.9792	88.08	95.28	90.34
2019-10-15 09:02:15	43753.4	1.37656	92.8541	88.05	95.2	90.09
2019-10-15 09:02:15	43753.4	1.37656	92.2981	87.6	94.61	89.56
2019-10-15 09:02:15	43753.4	1.37656	93.0002	88.19	95.33	90.27
2019-10-15 09:02:15	43753.4	1.37656	95.4264	90.34	97.91	92.5
2019-10-15 09:02:15	43753.4	1.37656	93.3321	88.61	95.61	90.67
2019-10-15 09:02:15	43753.4	1.37656	93.035	88.36	95.3	90.38
2019-10-15 09:02:15	43753.4	1.37656	92.5732	87.94	94.87	89.84
2019-10-15 09:02:15	43753.4	1.37656	93.2614	88.59	95.58	90.5
2019-10-15 09:02:15	43753.4	1.37656	93.7372	88.98	96.05	91.02
2019-10-15 09:02:15	43753.4	1.37656	93.5456	88.96	95.87	90.74
2019-10-15 09:02:15	43753.4	1.37656	94.0128	89.48	96.3	91.26
2019-10-15 09:02:15	43753.4	1.37656	93.1893	88.42	95.48	90.52
2019-10-15 09:02:15	43753.4	1.37656	93.3689	88.29	95.73	90.68
2019-10-15 09:02:15	43753.4	1.37656	93.1466	88.41	95.45	90.44
2019-10-15 09:02:15	43753.4	1.37656	92.7299	88.07	95.02	90.02
2019-10-15 09:02:15	43753.4	1.37656	93.824	89.12	96.14	91.08
2019-10-15 09:02:15	43753.4	1.37656	92.6791	87.91	94.99	89.97
2019-10-15 09:02:15	43753.4	1.37656	93.5022	88.78	95.77	90.86
2019-10-15 09:02:15	43753.4	1.37656	93.6803	89.1	95.95	90.98
2019-10-15 09:02:15	43753.4	1.37656	93.733	89.12	95.99	91.07
2019-10-15 09:02:15	43753.4	1.37656	92.3242	87.55	94.7	89.49
2019-10-15 09:02:15	43753.4	1.37656	92.6599	87.8	95.04	89.85
2019-10-15 09:02:15	43753.4	1.37656	93.0002	88.37	95.3	90.26
2019-10-15 09:02:15	43753.4	1.37656	93.2404	88.66	95.5	90.56
2019-10-15 09:02:15	43753.4	1.37656	92.0413	87.29	94.35	89.33
2019-10-15 09:02:15	43753.4	1.37656	92.5302	87.75	94.9	89.71
2019-10-15 09:02:15	43753.4	1.37656	93.1152	88.47	95.4	90.41
2019-10-15 09:02:15	43753.4	1.37656	93.8595	89.2	96.19	91.07
2019-10-15 09:02:15	43753.4	1.37656	93.3476	88.7	95.68	90.55
2019-10-15 09:02:15	43753.4	1.37656	92.9826	88.24	95.28	90.29
2019-10-15 09:02:15	43753.4	1.37656	93.2527	88.69	95.51	90.57
2019-10-15 09:02:15	43753.4	1.37656	93.1707	88.55	95.53	90.31
2019-10-15 09:02:15	43753.4	1.37656	92.5181	87.57	94.94	89.66
2019-10-15 09:02:15	43753.4	1.37656	92.6034	87.92	94.91	89.87
2019-10-15 09:02:15	43753.4	1.37656	93.6219	88.92	95.86	91.03
2019-10-15 09:02:15	43753.4	1.37656	93.8089	89.32	96.06	91.11
2019-10-15 09:02:15	43753.4	1.37656	93.76	89.1	96.04	91.07
2019-10-15 09:02:15	43753.4	1.37656	91.7484	86.74	94.07	89.11
2019-10-15 09:02:15	43753.4	1.37656	92.9469	88.34	95.22	90.25
2019-10-15 09:02:15	43753.4	1.37656	92.774	88.17	95.04	90.09
2019-10-15 09:02:15	43753.4	1.37656	92.6516	88.01	94.99	89.84
2019-10-15 09:02:15	43753.4	1.37656	93.3128	88.83	95.58	90.58
2019-10-15 09:02:15	43753.4	1.37656	93.4919	88.82	95.77	90.81
2019-10-15 09:02:15	43753.4	1.37656	93.4744	88.75	95.81	90.7
2019-10-15 09:02:15	43753.4	1.37656	92.7914	88.17	95.09	90.05
2019-10-15 09:02:15	43753.4	1.37656	94.0894	89.53	96.38	91.34
2019-10-15 09:32:15	43753.4	1.3974	93.0267	87.88	95.4	90.34
2019-10-15 09:32:15	43753.4	1.3974	93.0617	87.87	95.38	90.5
2019-10-15 09:32:14	43753.4	1.3974	93.9	89.01	96.23	91.2
2019-10-15 09:32:14	43753.4	1.3974	93.5074	88.34	95.88	90.83
2019-10-15 09:32:14	43753.4	1.3974	93.8482	88.77	96.27	91.04
2019-10-15 09:32:14	43753.4	1.3974	93.1941	88.05	95.54	90.56
2019-10-15 09:32:14	43753.4	1.3974	93.1749	88.06	95.49	90.59
2019-10-15 09:32:14	43753.4	1.3974	93.9497	88.93	96.32	91.22
2019-10-15 09:32:14	43753.4	1.3974	93.4214	88.26	95.8	90.73
2019-10-15 09:32:14	43753.4	1.3974	93.4109	88.25	95.84	90.62
2019-10-15 09:32:14	43753.4	1.3974	93.2474	87.98	95.67	90.51
2019-10-15 09:32:14	43753.4	1.3974	93.2685	88.08	95.61	90.66
2019-10-15 09:32:14	43753.4	1.3974	93.1679	88.13	95.49	90.54
2019-10-15 09:32:14	43753.4	1.3974	93.434	88.32	95.83	90.69
2019-10-15 09:32:14	43753.4	1.3974	93.7616	88.65	96.1	91.13
2019-10-15 09:32:14	43753.4	1.3974	93.5537	88.43	95.87	90.97
2019-10-15 09:32:14	43753.4	1.3974	93.2889	88.06	95.72	90.52
2019-10-15 09:32:14	43753.4	1.3974	92.9059	87.65	95.3	90.22
2019-10-15 09:32:14	43753.4	1.3974	93.2224	88.25	95.59	90.48
2019-10-15 09:32:14	43753.4	1.3974	93.5356	88.48	95.86	90.91
2019-10-15 09:32:14	43753.4	1.3974	93.0696	87.74	95.48	90.38
2019-10-15 09:32:14	43753.4	1.3974	93.8364	88.79	96.19	91.15
2019-10-15 09:32:14	43753.4	1.3974	93.8326	88.83	96.14	91.22
2019-10-15 09:32:14	43753.4	1.3974	93.2888	88.18	95.62	90.67
2019-10-15 09:32:14	43753.4	1.3974	93.2121	88.08	95.57	90.55
2019-10-15 09:32:14	43753.4	1.3974	93.4375	88.55	95.73	90.81
2019-10-15 09:32:14	43753.4	1.3974	93.8387	88.94	96.19	91.1
2019-10-15 09:32:14	43753.4	1.3974	93.2427	87.98	95.55	90.73
2019-10-15 09:32:14	43753.4	1.3974	93.2306	88.01	95.61	90.56
2019-10-15 09:32:14	43753.4	1.3974	93.3531	88.15	95.71	90.72
2019-10-15 09:32:14	43753.4	1.3974	93.2906	88.2	95.66	90.59
2019-10-15 09:32:14	43753.4	1.3974	93.9079	88.72	96.3	91.2
2019-10-15 09:32:14	43753.4	1.3974	93.4818	88.37	95.81	90.87
2019-10-15 09:32:14	43753.4	1.3974	92.5847	87.5	94.95	89.89
2019-10-15 09:32:14	43753.4	1.3974	94.0474	88.98	96.38	91.41
2019-10-15 09:32:14	43753.4	1.3974	93.3318	88.25	95.7	90.63
2019-10-15 09:32:14	43753.4	1.3974	94.0948	89.11	96.41	91.46
2019-10-15 09:32:14	43753.4	1.3974	93.2755	88.04	95.64	90.64
2019-10-15 09:32:14	43753.4	1.3974	92.9038	87.55	95.26	90.33
2019-10-15 09:32:14	43753.4	1.3974	93.345	88.23	95.65	90.78
2019-10-15 09:32:14	43753.4	1.3974	93.6191	88.49	95.98	90.95
2019-10-15 09:32:14	43753.4	1.3974	93.127	88.08	95.43	90.54
2019-10-15 09:32:14	43753.4	1.3974	93.4142	88.5	95.7	90.81
2019-10-15 09:32:14	43753.4	1.3974	92.9381	87.75	95.31	90.27
2019-10-15 09:32:14	43753.4	1.3974	93.4429	88.36	95.71	90.94
2019-10-15 09:32:14	43753.4	1.3974	93.6637	88.44	96.03	91.02
2019-10-15 09:32:14	43753.4	1.3974	93.3627	88.13	95.71	90.76
2019-10-15 10:02:15	43753.4	1.41823	93.138	88.1	95.45	90.53
2019-10-15 10:02:15	43753.4	1.41823	93.6349	88.71	96.02	90.84
2019-10-15 10:02:14	43753.4	1.41823	93.8757	89.05	96.14	91.28
2019-10-15 10:02:14	43753.4	1.41823	93.0956	88.27	95.37	90.48
2019-10-15 10:02:14	43753.4	1.41823	94.8566	90.15	97.2	92.06
2019-10-15 10:02:14	43753.4	1.41823	93.4351	88.48	95.76	90.77
2019-10-15 10:02:14	43753.4	1.41823	93.0447	88.06	95.37	90.39
2019-10-15 10:02:14	43753.4	1.41823	94.0224	89.22	96.26	91.47
2019-10-15 10:02:14	43753.4	1.41823	93.5286	88.67	95.76	91.01
2019-10-15 10:02:14	43753.4	1.41823	93.0961	88.35	95.34	90.51
2019-10-15 10:02:14	43753.4	1.41823	93.5112	88.58	95.86	90.79
2019-10-15 10:02:14	43753.4	1.41823	93.1745	88.37	95.49	90.47
2019-10-15 10:02:14	43753.4	1.41823	93.1582	88.33	95.47	90.47
2019-10-15 10:02:14	43753.4	1.41823	93.0466	88.15	95.32	90.46
2019-10-15 10:02:14	43753.4	1.41823	93.261	88.3	95.59	90.59
2019-10-15 10:02:14	43753.4	1.41823	92.9924	87.99	95.32	90.34
2019-10-15 10:02:14	43753.4	1.41823	93.0627	88.14	95.38	90.4
2019-10-15 10:02:14	43753.4	1.41823	93.0865	88.17	95.43	90.37
2019-10-15 10:02:14	43753.4	1.41823	93.1393	88.29	95.41	90.54
2019-10-15 10:02:14	43753.4	1.41823	93.33	88.21	95.71	90.62
2019-10-15 10:02:14	43753.4	1.41823	93.148	88.19	95.48	90.47
2019-10-15 10:02:14	43753.4	1.41823	93.3747	88.31	95.68	90.79
[truncated: 2,282 more rows]
